# Supplementary material for: A transcriptomic evaluation of the mechanism of programmed cell death of the replaceable bud in Chinese chestnut
Source: Open Life Sci. 2023 Jul 7;18(1):20220635. doi: 10.1515/biol-2022-0635 (PMC10329280; doi:10.1515/biol-2022-0635)
Supplement: Supplementary Table [file biol-2022-0635-sm.xlsx]

## Sheet: Table S1
Table S1 All the identified DEGs(10870) of three comparisons(S20 versus S25, S20 versus S30, and S25 versus S30)
#ID	gene_name	S20_FPKM	S25_FPKM	S30_FPKM	S20_vs_S30_DESeq2_FDR	S20_vs_S30_DESeq2_log2FC	S20_vs_S30_DESeq2_(FDR_0.01_FC_1.5)_regulated	S20_vs_S25_DESeq2_FDR	S20_vs_S25_DESeq2_log2FC	S20_vs_S25_DESeq2_(FDR_0.01_FC_1.5)_regulated	S25_vs_S30_SY_DESeq2_FDR	S25_vs_S30_DESeq2_log2FC	S25_vs_S30_DESeq2_(FDR_0.01_FC_1.5)_regulated	COG_class	COG_class_annotation	GO_annotation	KEGG_annotation	KEGG_pathway_annotation	KOG_class	KOG_class_annotation	Pfam_annotation	Swiss_Prot_annotation	eggNOG_class	eggNOG_class_annotation	NR_annotation	GO_second_level_annotation
EVM0015219	EVM0015219	6.54837	107.059	138.096	1.66064e-70	5.2067	up	2.07376e-48	4.45609	up	0.548489	0.694893	normal	--	--	--	--	--	--	--	--	--	S	Function unknown	PREDICTED: uncharacterized protein LOC108992662 [Juglans regia]	--
EVM0021273	EVM0021273	2.31422	0.500253	0.06449	2.29487e-29	-4.217	down	1.24281e-07	-1.71761	down	0.34543	-1.47965	normal	--	--	Cellular Component: 1,3-beta-D-glucan synthase complex (GO:0000148);; Molecular Function: 1,3-beta-D-glucan synthase activity (GO:0003843);; Biological Process: (1->3)-beta-D-glucan biosynthetic process (GO:0006075);; Cellular Component: integral component of membrane (GO:0016021);;	K11000|0|mdm:103448918|K11000 callose synthase [EC:2.4.1.-] | (RefSeq) putative callose synthase 8	--	[M]	Cell wall/membrane/envelope biogenesis	1,3-beta-glucan synthase component;; 1,3-beta-glucan synthase subunit FKS1, domain-1;; Vta1 like	Putative callose synthase 8 OS=Arabidopsis thaliana OX=3702 GN=CALS8 PE=3 SV=2	S	Function unknown	putative callose synthase 8 isoform X1 [Quercus suber]	cellular component: cell (GO:0005623);; cellular component: membrane (GO:0016020);; cellular component: macromolecular complex (GO:0032991);; cellular component: membrane part (GO:0044425);; cellular component: cell part (GO:0044464);; molecular function: catalytic activity (GO:0003824);; biological process: metabolic process (GO:0008152);; biological process: cellular process (GO:0009987);; biol…
EVM0023163	EVM0023163	8.21353	6.29223	1.17727	1.17422e-06	-2.02626	down	0.798936	0.0932547	normal	0.126794	-1.63305	normal	[J]	Translation, ribosomal structure and biogenesis	Molecular Function: carbon-nitrogen ligase activity, with glutamine as amido-N-donor (GO:0016884);;	K01426|0|mtr:MTR_8g080880|K01426 amidase [EC:3.5.1.4] | (RefSeq) amidase C869.01-like protein, putative	Arginine and proline metabolism (ko00330);; Phenylalanine metabolism (ko00360);; Tryptophan metabolism (ko00380)	[J]	Translation, ribosomal structure and biogenesis	Amidase	Probable amidase At4g34880 OS=Arabidopsis thaliana OX=3702 GN=At4g34880 PE=2 SV=1	J	Translation, ribosomal structure and biogenesis	probable amidase At4g34880 isoform X1 [Quercus suber]	molecular function: catalytic activity (GO:0003824)
EVM0026729	EVM0026729	2.74176	0.84063	0.670525	1.69319e-06	-1.24429	down	2.07702e-05	-1.22232	down	0.999183	0.0141807	normal	--	--	--	--	--	--	--	BRCT domain, a BRCA1 C-terminus domain	--	S	Function unknown	uncharacterized protein LOC112017215 isoform X1 [Quercus suber]	--
EVM0004736	EVM0004736	84.673	15.9136	0.657983	1.13947e-47	-6.04445	down	2.57456e-11	-1.9284	down	9.77619e-07	-3.37884	down	[QV]	Secondary metabolites biosynthesis, transport and catabolism;; Defense mechanisms	Molecular Function: iron ion binding (GO:0005506);; Cellular Component: membrane (GO:0016020);; Molecular Function: flavonoid 3'-monooxygenase activity (GO:0016711);; Molecular Function: heme binding (GO:0020037);; Biological Process: secondary metabolite biosynthetic process (GO:0044550);; Biological Process: oxidation-reduction process (GO:0055114);;	K17961|0|rcu:8286091|K17961 cytochrome P450 family 82 subfamily G polypeptide 1 [EC:1.14.-.-] | (RefSeq) cytochrome P450 82G1	Diterpenoid biosynthesis (ko00904)	[Q]	Secondary metabolites biosynthesis, transport and catabolism	Cytochrome P450	Cytochrome P450 82G1 OS=Arabidopsis thaliana OX=3702 GN=CYP82G1 PE=1 SV=1	Q	Secondary metabolites biosynthesis, transport and catabolism	cytochrome P450 82G1-like [Quercus suber]	molecular function: binding (GO:0005488);; cellular component: membrane (GO:0016020);; molecular function: catalytic activity (GO:0003824);; biological process: metabolic process (GO:0008152);; biological process: single-organism process (GO:0044699)
Castanea_mollissima_newGene_3801	--	4.87506	0	0	2.29174e-05	-6.96007	down	1.11209e-05	-5.63681	down	--	--	--	--	--	--	--	--	--	--	--	--	--	--	hypothetical protein CFP56_39324 [Quercus suber]	--
EVM0031082	EVM0031082	490.69	3.04325	0.285304	2.3763e-135	-9.79037	down	1.09146e-152	-6.80926	down	0.211833	-1.724	normal	--	--	Cellular Component: chloroplast (GO:0009507);;	--	--	--	--	Stress responsive A/B Barrel Domain	Stress-response A/B barrel domain-containing protein At5g22580 OS=Arabidopsis thaliana OX=3702 GN=At5g22580 PE=1 SV=1	S	Function unknown	stress-response A/B barrel domain-containing protein At5g22580 [Quercus suber]	cellular component: cell (GO:0005623);; cellular component: organelle (GO:0043226);; cellular component: cell part (GO:0044464)
EVM0026905	EVM0026905	2.04305	5.74005	9.65422	1.68171e-06	3.093	up	0.00163633	1.86973	up	0.663867	0.923089	normal	--	--	Cellular Component: integral component of membrane (GO:0016021);;	--	--	--	--	--	--	S	Function unknown	uncharacterized protein LOC111995828 isoform X2 [Quercus suber]	cellular component: membrane (GO:0016020);; cellular component: membrane part (GO:0044425)
EVM0006530	EVM0006530	2.87159	21.6078	56.4982	2.42885e-55	5.13642	up	7.15224e-33	3.34858	up	0.0188879	1.60433	normal	[F]	Nucleotide transport and metabolism	Molecular Function: catalytic activity (GO:0003824);; Biological Process: nucleoside metabolic process (GO:0009116);; Cellular Component: integral component of membrane (GO:0016021);;	--	--	--	--	Phosphorylase superfamily	Bark storage protein A OS=Populus deltoides OX=3696 GN=BSPA PE=2 SV=1	F	Nucleotide transport and metabolism	bark storage protein A-like [Quercus suber]	molecular function: catalytic activity (GO:0003824);; biological process: metabolic process (GO:0008152);; biological process: cellular process (GO:0009987);; biological process: single-organism process (GO:0044699);; cellular component: membrane (GO:0016020);; cellular component: membrane part (GO:0044425)
Castanea_mollissima_newGene_3178	--	0.982162	0.237059	0.086488	0.000141345	-2.53961	down	0.0201635	-1.75717	normal	--	--	--	--	--	--	--	--	--	--	--	--	S	Function unknown	--	--
EVM0014890	EVM0014890	34.7782	64.8866	60.7221	4.99932e-36	1.62539	up	1.61117e-21	1.36988	up	0.952061	0.264235	normal	--	--	Molecular Function: diacylglycerol kinase activity (GO:0004143);; Molecular Function: ATP binding (GO:0005524);; Biological Process: protein kinase C-activating G-protein coupled receptor signaling pathway (GO:0007205);; Biological Process: phosphorylation (GO:0016310);;	K00901|0|tcc:TCM_007928|K00901 diacylglycerol kinase (ATP) [EC:2.7.1.107] | (RefSeq) Diacylglycerol kinase 5 isoform 1	Glycerolipid metabolism (ko00561);; Glycerophospholipid metabolism (ko00564);; Phosphatidylinositol signaling system (ko04070)	[IT]	Lipid transport and metabolism;; Signal transduction mechanisms	Diacylglycerol kinase accessory domain;; Diacylglycerol kinase catalytic domain	Diacylglycerol kinase 5 OS=Arabidopsis thaliana OX=3702 GN=DGK5 PE=2 SV=1	I	Lipid transport and metabolism	PREDICTED: diacylglycerol kinase 5 isoform X1 [Juglans regia]	molecular function: catalytic activity (GO:0003824);; biological process: metabolic process (GO:0008152);; biological process: cellular process (GO:0009987);; molecular function: binding (GO:0005488);; biological process: signaling (GO:0023052);; biological process: single-organism process (GO:0044699);; biological process: response to stimulus (GO:0050896);; biological process: biological regula…
EVM0023132	EVM0023132	8.39098	0.464583	0.0898415	1.27497e-28	-5.4683	down	2.15388e-21	-3.59465	down	--	--	--	--	--	Molecular Function: transferase activity, transferring acyl groups other than amino-acyl groups (GO:0016747);;	--	--	--	--	Transferase family	Anthocyanin 5-aromatic acyltransferase OS=Gentiana triflora OX=55190 PE=1 SV=1	S	Function unknown	anthocyanin 5-aromatic acyltransferase-like [Quercus suber]	molecular function: catalytic activity (GO:0003824)
EVM0024257	EVM0024257	6.57674	5.71142	4.58692	0.101172	0.287078	normal	0.266264	0.269979	normal	0.995177	0.0472387	normal	--	--	Biological Process: cell morphogenesis (GO:0000902);;	--	--	--	--	--	Uncharacterized protein At5g41620 OS=Arabidopsis thaliana OX=3702 GN=At5g41620 PE=2 SV=2	S	Function unknown	uncharacterized protein LOC111993924 isoform X1 [Quercus suber]	biological process: cellular process (GO:0009987);; biological process: developmental process (GO:0032502);; biological process: single-organism process (GO:0044699);; biological process: cellular component organization or biogenesis (GO:0071840)
EVM0022148	EVM0022148	2.3518	0.273215	0.097292	3.81825e-14	-3.64716	down	3.97123e-07	-2.52135	down	--	--	--	[O]	Posttranslational modification, protein turnover, chaperones	Molecular Function: ATP binding (GO:0005524);;	K03283|0|thj:104827323|K03283 heat shock 70kDa protein 1/8 | (RefSeq) probable mediator of RNA polymerase II transcription subunit 37c	Spliceosome (ko03040);; Protein processing in endoplasmic reticulum (ko04141);; Endocytosis (ko04144)	[O]	Posttranslational modification, protein turnover, chaperones	Hsp70 protein;; MreB/Mbl protein	Heat shock cognate 70 kDa protein OS=Petunia hybrida OX=4102 GN=HSP70 PE=2 SV=1	O	Posttranslational modification, protein turnover, chaperones	heat shock cognate 70 kDa protein-like isoform X2 [Quercus suber]	molecular function: binding (GO:0005488)
EVM0003803	EVM0003803	17.9242	6.32069	4.75338	5.27443e-07	-1.12034	down	4.6021e-05	-1.02585	down	0.995177	-0.0453413	normal	[T]	Signal transduction mechanisms	Molecular Function: protein serine/threonine kinase activity (GO:0004674);; Molecular Function: ATP binding (GO:0005524);; Cellular Component: nucleus (GO:0005634);; Cellular Component: cytoplasm (GO:0005737);; Biological Process: protein phosphorylation (GO:0006468);; Biological Process: intracellular signal transduction (GO:0035556);;	K14498|0|gra:105791999|K14498 serine/threonine-protein kinase SRK2 [EC:2.7.11.1] | (RefSeq) serine/threonine-protein kinase SAPK3-like	Plant hormone signal transduction (ko04075)	[T]	Signal transduction mechanisms	Protein kinase domain;; Protein tyrosine kinase	Serine/threonine-protein kinase SAPK3 OS=Oryza sativa subsp. japonica OX=39947 GN=SAPK3 PE=1 SV=1	T	Signal transduction mechanisms	serine/threonine-protein kinase SAPK3-like isoform X2 [Quercus suber]	molecular function: catalytic activity (GO:0003824);; biological process: metabolic process (GO:0008152);; biological process: cellular process (GO:0009987);; molecular function: binding (GO:0005488);; cellular component: cell (GO:0005623);; cellular component: organelle (GO:0043226);; cellular component: cell part (GO:0044464);; biological process: signaling (GO:0023052);; biological process: si…
EVM0012175	EVM0012175	11.9346	2.9078	1.09129	4.06393e-36	-2.62658	down	8.45701e-12	-1.54836	down	0.638336	-0.85268	normal	[R]	General function prediction only	--	--	--	[T]	Signal transduction mechanisms	NB-ARC domain;; Leucine rich repeat;; Leucine Rich repeats (2 copies)	Putative disease resistance protein RGA4 OS=Solanum bulbocastanum OX=147425 GN=RGA4 PE=2 SV=1	S	Function unknown	disease resistance protein RGA2-like [Quercus suber]	--
EVM0032316	EVM0032316	0.058734	3.71202	3.45904	2.33601e-22	6.4544	up	0.00537035	4.31842	up	0.974936	0.24615	normal	[T]	Signal transduction mechanisms	Molecular Function: protein serine/threonine kinase activity (GO:0004674);; Molecular Function: ATP binding (GO:0005524);; Biological Process: protein phosphorylation (GO:0006468);; Cellular Component: integral component of membrane (GO:0016021);;	K04733|0|rcu:8274302|K04733 interleukin-1 receptor-associated kinase 4 [EC:2.7.11.1] | (RefSeq) wall-associated receptor kinase-like 1	--	--	--	Protein kinase domain;; Protein tyrosine kinase;; LysM domain	Wall-associated receptor kinase-like 2 OS=Arabidopsis thaliana OX=3702 GN=WAKL2 PE=2 SV=1	T	Signal transduction mechanisms	wall-associated receptor kinase-like 1 [Quercus suber]	molecular function: catalytic activity (GO:0003824);; biological process: metabolic process (GO:0008152);; biological process: cellular process (GO:0009987);; molecular function: binding (GO:0005488);; cellular component: membrane (GO:0016020);; cellular component: membrane part (GO:0044425)
EVM0008528	EVM0008528	7.3888	3.53301	1.76859	9.58211e-05	-1.26415	down	0.174422	-0.574079	normal	0.957921	-0.417953	normal	--	--	--	--	--	--	--	--	--	S	Function unknown	hypothetical protein CFP56_18071 [Quercus suber]	--
EVM0029878	EVM0029878	0.985656	3.03835	4.47121	1.62135e-15	2.99386	up	8.04913e-06	2.03787	up	0.492515	0.846421	normal	--	--	Molecular Function: metal ion binding (GO:0046872);;	K16276|0|vvi:100267228|K16276 zinc finger protein-like protein | (RefSeq) zinc finger protein BRUTUS-like At1g18910	--	[R]	General function prediction only	Zinc-ribbon;; CHY zinc finger;; Hemerythrin HHE cation binding domain;; Ring finger domain	Zinc finger protein BRUTUS-like At1g74770 OS=Arabidopsis thaliana OX=3702 GN=At1g74770 PE=2 SV=1	S	Function unknown	zinc finger protein BRUTUS-like At1g74770 isoform X1 [Quercus suber]	molecular function: binding (GO:0005488)
EVM0022876	EVM0022876	2.66123	0	0	1.31686e-06	-7.67943	down	2.25926e-07	-6.35317	down	--	--	--	[F]	Nucleotide transport and metabolism	Molecular Function: catalytic activity (GO:0003824);;	--	--	--	--	Protein of unknown function (DUF561)	Uncharacterized protein ycf23 OS=Pyropia yezoensis OX=2788 GN=ycf23 PE=3 SV=1	S	Function unknown	uncharacterized protein ycf23-like [Quercus suber]	molecular function: catalytic activity (GO:0003824)
EVM0025138	EVM0025138	8.76008	3.58565	1.79612	3.85925e-08	-1.45359	down	0.0199074	-0.808928	normal	0.952849	-0.4262	normal	--	--	Molecular Function: DNA binding (GO:0003677);; Molecular Function: DNA-directed DNA polymerase activity (GO:0003887);; Cellular Component: cytoplasm (GO:0005737);; Biological Process: DNA-dependent DNA replication (GO:0006261);; Molecular Function: 3'-5' exonuclease activity (GO:0008408);; Molecular Function: 5'-3' exonuclease activity (GO:0008409);; Biological Process: DNA biosynthetic process (…	K02335|8.22871e-44|csv:101212518|K02335 DNA polymerase I [EC:2.7.7.7] | (RefSeq) DNA polymerase I B, chloroplastic/mitochondrial	Purine metabolism (ko00230);; Pyrimidine metabolism (ko00240);; DNA replication (ko03030);; Base excision repair (ko03410);; Nucleotide excision repair (ko03420);; Homologous recombination (ko03440)	[R]	General function prediction only	--	DNA polymerase I B, mitochondrial OS=Oryza sativa subsp. japonica OX=39947 GN=Os08g0175600 PE=3 SV=1	L	Replication, recombination and repair	DNA polymerase I A, chloroplastic/mitochondrial-like [Quercus suber]	molecular function: binding (GO:0005488);; molecular function: catalytic activity (GO:0003824);; biological process: metabolic process (GO:0008152);; biological process: cellular process (GO:0009987);; cellular component: cell (GO:0005623);; cellular component: cell part (GO:0044464)
EVM0021010	EVM0021010	4.63914	1.72161	1.03962	5.30679e-05	-1.30054	down	0.0120903	-0.938003	normal	0.985061	-0.236774	normal	--	--	--	--	--	--	--	Leucine Rich repeats (2 copies)	Disease resistance RPP13-like protein 4 OS=Arabidopsis thaliana OX=3702 GN=RPP13L4 PE=1 SV=2	S	Function unknown	disease resistance RPP13-like protein 4 [Quercus suber]	--
EVM0008978	EVM0008978	14.2029	0.922929	0.547026	1.5124e-57	-3.85964	down	4.30127e-39	-3.43474	down	0.988767	-0.229711	normal	--		Molecular Function: protein kinase activity (GO:0004672);; Molecular Function: ATP binding (GO:0005524);; Biological Process: protein phosphorylation (GO:0006468);; Cellular Component: integral component of membrane (GO:0016021);; Molecular Function: 2-alkenal reductase [NAD(P)] activity (GO:0032440);; Biological Process: oxidation-reduction process (GO:0055114);;	--	--	--	--	Protein kinase domain;; Protein tyrosine kinase;; Leucine Rich repeats (2 copies);; Leucine rich repeat;; Leucine rich repeat N-terminal domain	Inactive leucine-rich repeat receptor-like serine/threonine-protein kinase At1g60630 OS=Arabidopsis thaliana OX=3702 GN=At1g60630 PE=2 SV=1	T	Signal transduction mechanisms	inactive leucine-rich repeat receptor-like serine/threonine-protein kinase At1g60630 [Quercus suber]	molecular function: catalytic activity (GO:0003824);; biological process: metabolic process (GO:0008152);; biological process: cellular process (GO:0009987);; molecular function: binding (GO:0005488);; cellular component: membrane (GO:0016020);; cellular component: membrane part (GO:0044425);; biological process: single-organism process (GO:0044699)
EVM0032632	EVM0032632	83.3579	19.039	6.33494	5.97995e-73	-2.92547	down	1.41122e-32	-1.65531	down	0.17816	-1.10558	normal	--	--	Biological Process: cytoskeleton organization (GO:0007010);; Molecular Function: microtubule binding (GO:0008017);;	--	--	--	--	Microtubule-associated protein 70;; Microtubule-associated protein 70	Microtubule-associated protein 70-1 OS=Arabidopsis thaliana OX=3702 GN=MAP70.1 PE=1 SV=1	S	Function unknown	microtubule-associated protein 70-1-like isoform X2 [Quercus suber]	biological process: cellular process (GO:0009987);; biological process: cellular component organization or biogenesis (GO:0071840);; molecular function: binding (GO:0005488)
EVM0020240	EVM0020240	1.41527	0	0	1.58548e-05	-7.05299	down	6.61214e-06	-5.73655	down	--	--	--	--	--	Molecular Function: transcription factor activity, sequence-specific DNA binding (GO:0003700);; Cellular Component: nucleus (GO:0005634);; Biological Process: regulation of transcription, DNA-templated (GO:0006355);; Molecular Function: sequence-specific DNA binding (GO:0043565);;	K09338|2.96063e-92|rcu:8265803|K09338 homeobox-leucine zipper protein | (RefSeq) homeobox-leucine zipper protein HAT3	--	[K]	Transcription	HD-ZIP protein N terminus;; Homeobox domain;; Homeobox associated leucine zipper;; Homeobox KN domain	Homeobox-leucine zipper protein HAT3 OS=Arabidopsis thaliana OX=3702 GN=HAT3 PE=1 SV=2	K	Transcription	PREDICTED: homeobox-leucine zipper protein HAT3 [Juglans regia]	molecular function: nucleic acid binding transcription factor activity (GO:0001071);; biological process: biological regulation (GO:0065007);; cellular component: cell (GO:0005623);; cellular component: organelle (GO:0043226);; cellular component: cell part (GO:0044464);; molecular function: binding (GO:0005488)
EVM0024246	EVM0024246	0.143368	3.88364	0.347871	--	--	--	0.0567014	3.12523	normal	0.119927	-1.93514	normal	--	--	Cellular Component: cell wall (GO:0005618);; Cellular Component: vacuole (GO:0005773);; Biological Process: carbohydrate metabolic process (GO:0005975);; Molecular Function: cellulase activity (GO:0008810);; Molecular Function: polysaccharide binding (GO:0030247);; Cellular Component: anchored component of plasma membrane (GO:0046658);;	--	--	--	--	Glycosyl hydrolases family 17	Glucan endo-1,3-beta-glucosidase, basic isoform OS=Prunus persica OX=3760 GN=GNS1 PE=3 SV=1	G	Carbohydrate transport and metabolism	glucan endo-1,3-beta-glucosidase, basic isoform-like [Quercus suber]	cellular component: cell (GO:0005623);; cellular component: cell part (GO:0044464);; cellular component: organelle (GO:0043226);; biological process: metabolic process (GO:0008152);; molecular function: catalytic activity (GO:0003824);; molecular function: binding (GO:0005488);; cellular component: membrane (GO:0016020);; cellular component: membrane part (GO:0044425)
EVM0020175	EVM0020175	2.16004	94.8431	336.196	7.52563e-52	8.09642	up	5.1675e-167	5.89987	up	0.0144696	1.91978	normal	[P]	Inorganic ion transport and metabolism	Molecular Function: ATP binding (GO:0005524);; Cellular Component: integral component of plasma membrane (GO:0005887);; Biological Process: ATP biosynthetic process (GO:0006754);; Molecular Function: hydrogen-exporting ATPase activity, phosphorylative mechanism (GO:0008553);; Cellular Component: intracellular membrane-bounded organelle (GO:0043231);; Molecular Function: metal ion binding (GO:0046…	K01535|0|cmo:103492804|K01535 H+-transporting ATPase [EC:3.6.3.6] | (RefSeq) plasma membrane ATPase 4	Oxidative phosphorylation (ko00190)	[P]	Inorganic ion transport and metabolism	E1-E2 ATPase;; haloacid dehalogenase-like hydrolase;; Cation transporter/ATPase, N-terminus;; Cation transport ATPase (P-type);; Transmembrane protein 239 family	Plasma membrane ATPase 4 OS=Nicotiana plumbaginifolia OX=4092 GN=PMA4 PE=2 SV=1	P	Inorganic ion transport and metabolism	plasma membrane atpase 4 [Quercus suber]	molecular function: binding (GO:0005488);; cellular component: cell (GO:0005623);; cellular component: membrane (GO:0016020);; cellular component: membrane part (GO:0044425);; cellular component: cell part (GO:0044464);; biological process: metabolic process (GO:0008152);; biological process: cellular process (GO:0009987);; biological process: single-organism process (GO:0044699);; molecular func…
Castanea_mollissima_newGene_3941	--	0.600759	0.064371	0.027399	9.78147e-05	-3.42692	down	0.00331493	-2.52383	down	--	--	--	--	--	--	--	--	[R]	General function prediction only	zinc-binding in reverse transcriptase;; Reverse transcriptase-like	Uncharacterized mitochondrial protein AtMg00310 OS=Arabidopsis thaliana OX=3702 GN=AtMg00310 PE=4 SV=1	S	Function unknown	uncharacterized protein LOC111987155 [Quercus suber]	--
Castanea_mollissima_newGene_7405	--	8.63806	2.1039	0.440592	2.01506e-09	-3.37406	down	0.0100361	-1.49854	normal	0.819016	-0.823977	normal	--	--	Cellular Component: membrane (GO:0016020);;	--	--	--	--	--	Putative zinc finger protein At1g68190 OS=Arabidopsis thaliana OX=3702 GN=At1g68190 PE=2 SV=1	S	Function unknown	zinc finger protein CONSTANS-LIKE 9 [Quercus suber]	cellular component: membrane (GO:0016020)
EVM0029896	EVM0029896	8.6618	23.5463	18.295	2.87788e-14	1.92258	up	2.82685e-20	1.90409	up	0.995177	0.0424114	normal	--	--	--	--	--	--	--	VQ motif	--	S	Function unknown	probable serine/threonine-protein kinase DDB_G0267686 [Quercus suber]	--
EVM0028689	EVM0028689	15.5806	25.506	18.7989	0.0034712	1.15564	up	1.15103e-07	1.17386	up	0.999659	0.0080517	normal	--	--	Cellular Component: membrane (GO:0016020);;	--	--	--	--	Kelch motif;; Galactose oxidase, central domain;; Kelch motif;; F-box domain	F-box/kelch-repeat protein At1g23390 OS=Arabidopsis thaliana OX=3702 GN=At1g23390 PE=2 SV=1	S	Function unknown	F-box/kelch-repeat protein At1g23390 [Quercus suber]	cellular component: membrane (GO:0016020)
EVM0000473	EVM0000473	4.32826	0.366593	0	2.02532e-06	-7.57194	down	2.03217e-05	-2.87351	down	--	--	--	--	--	--	--	--	--	--	--	--	--	--	hypothetical protein CFP56_37663 [Quercus suber]	--
Castanea_mollissima_newGene_3725	--	8.47085	27.7253	19.5847	0.000109934	1.88484	up	6.52125e-16	2.1614	up	0.988767	-0.179046	normal	--	--	--	--	--	--	--	--	--	--	--	--	--
EVM0032947	EVM0032947	24.5546	5.07753	0.488523	2.90596e-63	-4.79778	down	3.83969e-15	-1.79093	down	0.0244304	-2.19542	normal	--	--	--	--	--	[KB]	Transcription;; Chromatin structure and dynamics	Methyl-CpG binding domain	Methyl-CpG-binding domain-containing protein 7 OS=Arabidopsis thaliana OX=3702 GN=MBD7 PE=1 SV=1	S	Function unknown	methyl-CpG-binding domain-containing protein 7-like [Quercus suber]	--
EVM0029911	EVM0029911	27.7434	10.5147	5.96	5.95185e-14	-1.4325	down	7.08296e-10	-0.92294	down	0.900345	-0.417734	normal	--	--	Cellular Component: nuclear pore (GO:0005643);; Biological Process: transport (GO:0006810);;	K14301|0|jcu:105631364|K14301 nuclear pore complex protein Nup107 | (RefSeq) nuclear pore complex protein NUP107	RNA transport (ko03013)	[YU]	Nuclear structure;; Intracellular trafficking, secretion, and vesicular transport	Nuclear pore protein 84 / 107	Nuclear pore complex protein NUP107 OS=Arabidopsis thaliana OX=3702 GN=NUP107 PE=1 SV=1	U	Intracellular trafficking, secretion, and vesicular transport	nuclear pore complex protein NUP107 [Hevea brasiliensis]	cellular component: cell (GO:0005623);; cellular component: macromolecular complex (GO:0032991);; cellular component: organelle (GO:0043226);; cellular component: organelle part (GO:0044422);; cellular component: cell part (GO:0044464);; biological process: localization (GO:0051179)
EVM0025980	EVM0025980	0.240421	1.11243	1.89	6.06793e-10	3.58823	up	0.0293317	2.29468	normal	0.884823	0.678215	normal	--	--	--	--	--	--	--	Phloem protein 2	F-box protein PP2-B15 OS=Arabidopsis thaliana OX=3702 GN=PP2B15 PE=2 SV=2	S	Function unknown	F-box protein PP2-B15-like [Quercus suber]	--
EVM0014786	EVM0014786	7.66641	10.5586	12.7413	3.92988e-06	1.48411	up	0.00873376	0.920166	up	0.888868	0.50732	normal	--	--	--	--	--	--	--	--	Light-harvesting complex-like protein OHP1, chloroplastic OS=Arabidopsis thaliana OX=3702 GN=OHP1 PE=1 SV=1	S	Function unknown	putative cyclin-d7-1 [Quercus suber]	--
EVM0010099	EVM0010099	28.8025	29.9282	62.0036	1.4563e-05	2.00671	up	0.00213036	0.525025	normal	0.166714	1.29623	normal	[M]	Cell wall/membrane/envelope biogenesis	--	K06119|0|cic:CICLE_v10011473mg|K06119 sulfoquinovosyltransferase [EC:2.4.1.-] | (RefSeq) hypothetical protein	Glycerolipid metabolism (ko00561)	[MOI]	Cell wall/membrane/envelope biogenesis;; Posttranslational modification, protein turnover, chaperones;; Lipid transport and metabolism	Glycosyl transferases group 1;; Glycosyl transferases group 1;; Glycosyltransferase Family 4;; Glycosyl transferase 4-like domain;; Glycosyl transferases group 1;; Glycosyl transferase 4-like	Sulfoquinovosyl transferase SQD2 OS=Arabidopsis thaliana OX=3702 GN=SQD2 PE=1 SV=1	M	Cell wall/membrane/envelope biogenesis	sulfoquinovosyl transferase SQD2-like [Quercus suber]	--
EVM0024490	EVM0024490	3.87428	0.482072	0.439657	1.4616e-11	-2.2823	down	7.44937e-08	-2.45832	down	--	--	--	--	--	Molecular Function: DNA binding (GO:0003677);; Cellular Component: nucleus (GO:0005634);; Biological Process: regulation of transcription, DNA-templated (GO:0006355);; Cellular Component: integral component of membrane (GO:0016021);;	--	--	--	--	No apical meristem (NAM) protein	NAC domain-containing protein 37 OS=Arabidopsis thaliana OX=3702 GN=NAC037 PE=1 SV=1	S	Function unknown	NAC domain-containing protein 37-like [Quercus suber]	molecular function: binding (GO:0005488);; cellular component: cell (GO:0005623);; cellular component: organelle (GO:0043226);; cellular component: cell part (GO:0044464);; biological process: biological regulation (GO:0065007);; cellular component: membrane (GO:0016020);; cellular component: membrane part (GO:0044425)
EVM0010215	EVM0010215	43.9586	61.2041	54.2534	4.07661e-07	1.14849	up	1.26039e-07	0.948232	up	0.97161	0.209628	normal	[J]	Translation, ribosomal structure and biogenesis	Biological Process: MAPK cascade (GO:0000165);; Molecular Function: MAP kinase activity (GO:0004707);; Molecular Function: ATP binding (GO:0005524);; Cellular Component: intracellular (GO:0005622);;	K14512|0|aip:107631166|K14512 mitogen-activated protein kinase 6 [EC:2.7.11.24] | (RefSeq) mitogen-activated protein kinase homolog MMK1	Plant hormone signal transduction (ko04075)	[T]	Signal transduction mechanisms	Protein kinase domain;; Protein tyrosine kinase	Mitogen-activated protein kinase homolog NTF4 OS=Nicotiana tabacum OX=4097 GN=NTF4 PE=2 SV=1	T	Signal transduction mechanisms	mitogen-activated protein kinase like d5 [Quercus suber]	biological process: metabolic process (GO:0008152);; biological process: cellular process (GO:0009987);; biological process: signaling (GO:0023052);; biological process: single-organism process (GO:0044699);; biological process: response to stimulus (GO:0050896);; biological process: biological regulation (GO:0065007);; molecular function: catalytic activity (GO:0003824);; molecular function: sig…
EVM0005179	EVM0005179	10.2999	3.20469	1.52949	9.59541e-12	-1.90178	down	0.000237085	-1.19386	down	0.944278	-0.46722	normal	[I]	Lipid transport and metabolism	Cellular Component: cytoplasm (GO:0005737);; Biological Process: fatty acid biosynthetic process (GO:0006633);; Molecular Function: hydro-lyase activity (GO:0016836);;	K02372|3.39035e-111|egr:104419917|K02372 3-hydroxyacyl-[acyl-carrier-protein] dehydratase [EC:4.2.1.59] | (RefSeq) 3-hydroxyacyl-[acyl-carrier-protein] dehydratase FabZ	Fatty acid biosynthesis (ko00061);; Biotin metabolism (ko00780);; Fatty acid metabolism (ko01212)	--	--	FabA-like domain;; MaoC like domain	--	I	Lipid transport and metabolism	uncharacterized protein LOC112005067 [Quercus suber]	cellular component: cell (GO:0005623);; cellular component: cell part (GO:0044464);; biological process: metabolic process (GO:0008152);; biological process: cellular process (GO:0009987);; biological process: single-organism process (GO:0044699);; molecular function: catalytic activity (GO:0003824)
EVM0002734	EVM0002734	1.90709	0.31977	0.0781205	1.07472e-08	-3.66518	down	0.000935739	-1.98928	down	--	--	--	--	--	--	--	--	--	--	--	Membrane protein of ER body-like protein OS=Arabidopsis thaliana OX=3702 GN=MEBL PE=2 SV=1	S	Function unknown	isoform 3 of membrane protein of er body 1 [Quercus suber]	--
EVM0021732	EVM0021732	4.92296	1.62906	0.69845	3.92965e-07	-2.00905	down	0.00530312	-1.1074	down	0.944842	-0.495569	normal	--	--	Molecular Function: calcium ion binding (GO:0005509);; Cellular Component: chloroplast thylakoid membrane (GO:0009535);; Cellular Component: photosystem II oxygen evolving complex (GO:0009654);; Biological Process: photosynthesis (GO:0015979);; Cellular Component: extrinsic component of membrane (GO:0019898);; Cellular Component: thylakoid lumen (GO:0031977);;	--	--	--	--	PsbP	PsbP domain-containing protein 3, chloroplastic OS=Arabidopsis thaliana OX=3702 GN=PPD3 PE=1 SV=2	S	Function unknown	psbP domain-containing protein 3, chloroplastic [Quercus suber]	molecular function: binding (GO:0005488);; cellular component: cell (GO:0005623);; cellular component: membrane (GO:0016020);; cellular component: organelle (GO:0043226);; cellular component: organelle part (GO:0044422);; cellular component: cell part (GO:0044464);; cellular component: macromolecular complex (GO:0032991);; cellular component: membrane part (GO:0044425);; biological process: metab…
EVM0021314	EVM0021314	24.5789	59.01	69.9274	4.45132e-11	2.38261	up	8.26191e-25	1.72858	up	0.755812	0.608254	normal	[E]	Amino acid transport and metabolism	Molecular Function: transaminase activity (GO:0008483);; Biological Process: biosynthetic process (GO:0009058);; Molecular Function: pyridoxal phosphate binding (GO:0030170);;	K00814|0|pper:PRUPE_ppa003850mg|K00814 alanine transaminase [EC:2.6.1.2] | (RefSeq) hypothetical protein	Arginine biosynthesis (ko00220);; Alanine, aspartate and glutamate metabolism (ko00250);; Carbon fixation in photosynthetic organisms (ko00710);; Carbon metabolism (ko01200);; 2-Oxocarboxylic acid metabolism (ko01210);; Biosynthesis of amino acids (ko01230)	[E]	Amino acid transport and metabolism	Aminotransferase class I and II	Alanine aminotransferase 2, mitochondrial OS=Arabidopsis thaliana OX=3702 GN=ALAAT2 PE=1 SV=1	E	Amino acid transport and metabolism	alanine aminotransferase 2, mitochondrial [Quercus suber]	molecular function: catalytic activity (GO:0003824);; biological process: metabolic process (GO:0008152);; molecular function: binding (GO:0005488)
EVM0001057	EVM0001057	1.17573	8.89221	11.3885	1.58458e-30	4.10556	up	2.59124e-19	3.33098	up	0.708398	0.679445	normal	[O]	Posttranslational modification, protein turnover, chaperones	Cellular Component: nucleus (GO:0005634);; Biological Process: intracellular signal transduction (GO:0035556);;	K17609|0|vvi:100257684|K17609 nucleoredoxin [EC:1.8.1.8] | (RefSeq) probable nucleoredoxin 3	--	[R]	General function prediction only	Thioredoxin-like;; AhpC/TSA family;; Thioredoxin;; Thioredoxin-like domain;; Thioredoxin-like;; C1 domain	Probable nucleoredoxin 3 OS=Arabidopsis thaliana OX=3702 GN=At4g31240 PE=2 SV=1	O	Posttranslational modification, protein turnover, chaperones	probable nucleoredoxin 3 [Quercus suber]	cellular component: cell (GO:0005623);; cellular component: organelle (GO:0043226);; cellular component: cell part (GO:0044464);; biological process: cellular process (GO:0009987);; biological process: signaling (GO:0023052);; biological process: single-organism process (GO:0044699);; biological process: response to stimulus (GO:0050896);; biological process: biological regulation (GO:0065007)
EVM0032457	EVM0032457	25.7792	38.2925	68.6219	0.000134892	2.3319	up	1.34922e-10	1.03994	up	0.442472	1.08028	normal	--	--	--	--	--	--	--	Thaumatin family	Thaumatin-like protein 1 OS=Pyrus pyrifolia OX=3767 GN=TL1 PE=1 SV=1	S	Function unknown	thaumatin-like protein 1b [Quercus suber]	--
EVM0030380	EVM0030380	11.5504	12.8526	15.0707	8.83193e-08	1.22689	up	0.00304749	0.623094	up	0.777313	0.565878	normal	[M]	Cell wall/membrane/envelope biogenesis	Molecular Function: phospholipid binding (GO:0005543);; Molecular Function: phospholipid transporter activity (GO:0005548);; Cellular Component: chloroplast inner membrane (GO:0009706);; Cellular Component: chloroplast outer membrane (GO:0009707);; Biological Process: phospholipid transport (GO:0015914);; Cellular Component: ATP-binding cassette (ABC) transporter complex (GO:0043190);;	--	--	--	--	Permease MlaE	Protein TRIGALACTOSYLDIACYLGLYCEROL 1, chloroplastic OS=Arabidopsis thaliana OX=3702 GN=TGD1 PE=1 SV=1	Q	Secondary metabolites biosynthesis, transport and catabolism	protein TRIGALACTOSYLDIACYLGLYCEROL 1, chloroplastic isoform X2 [Quercus suber]	molecular function: binding (GO:0005488);; molecular function: transporter activity (GO:0005215);; biological process: single-organism process (GO:0044699);; biological process: localization (GO:0051179);; cellular component: cell (GO:0005623);; cellular component: membrane (GO:0016020);; cellular component: organelle (GO:0043226);; cellular component: organelle part (GO:0044422);; cellular compo…
EVM0013996	EVM0013996	3.18931	1.19087	0.365928	1.07214e-08	-2.23472	down	0.0378571	-0.918601	normal	0.853367	-0.756603	normal	--	--	Molecular Function: DNA binding (GO:0003677);;	K09422|6.27526e-172|vvi:100256309|K09422 myb proto-oncogene protein, plant | (RefSeq) myb-like protein B	--	[K]	Transcription	Myb-like DNA-binding domain;; Myb-like DNA-binding domain	Transcription factor MYB1 OS=Arabidopsis thaliana OX=3702 GN=MYB1 PE=2 SV=1	K	Transcription	LOW QUALITY PROTEIN: transcription factor MYB1-like [Quercus suber]	molecular function: binding (GO:0005488)
EVM0009813	EVM0009813	46.6919	379.646	241.753	2.64095e-28	3.16287	up	4.17238e-33	3.46993	up	0.950103	-0.261796	normal	--	--	Cellular Component: membrane (GO:0016020);;	--	--	--	--	--	--	S	Function unknown	vegetative cell wall protein gp1-like [Quercus suber]	cellular component: membrane (GO:0016020)
EVM0028424	EVM0028424	6.62992	4.56776	0.619094	1.51968e-06	-2.65362	down	0.896409	-0.0563526	normal	0.0296395	-2.01471	normal	[L]	Replication, recombination and repair	--	K10706|0|pmum:103327482|K10706 senataxin [EC:3.6.4.-] | (RefSeq) helicase sen1-like	--	[A]	RNA processing and modification	AAA domain;; AAA domain;; AAA domain;; AAA domain;; Viral (Superfamily 1) RNA helicase	Probable helicase MAGATAMA 3 OS=Arabidopsis thaliana OX=3702 GN=MAA3 PE=2 SV=1	L	Replication, recombination and repair	hypothetical protein PRUPE_1G202500 [Prunus persica]	--
EVM0031191	EVM0031191	22.5134	7.32853	5.05834	3.77889e-06	-1.3248	down	0.00088427	-1.13102	down	0.993553	-0.119722	normal	--	--	Cellular Component: nucleus (GO:0005634);; Biological Process: regulation of transcription, DNA-templated (GO:0006355);; Biological Process: auxin-activated signaling pathway (GO:0009734);;	K14484|6.14562e-128|pmum:103323939|K14484 auxin-responsive protein IAA | (RefSeq) auxin-responsive protein IAA14	Plant hormone signal transduction (ko04075)	--	--	AUX/IAA family	Auxin-responsive protein IAA7 OS=Arabidopsis thaliana OX=3702 GN=IAA7 PE=1 SV=1	K	Transcription	auxin-responsive protein IAA14-like [Quercus suber]	cellular component: cell (GO:0005623);; cellular component: organelle (GO:0043226);; cellular component: cell part (GO:0044464);; biological process: biological regulation (GO:0065007);; biological process: cellular process (GO:0009987);; biological process: signaling (GO:0023052);; biological process: single-organism process (GO:0044699);; biological process: response to stimulus (GO:0050896)
EVM0011242	EVM0011242	8.93844	11.6826	5.21967	0.996109	-0.00184805	normal	0.0196155	0.843208	normal	0.838768	-0.647894	normal	--	--	Cellular Component: cytoplasm (GO:0005737);; Molecular Function: glycolipid transporter activity (GO:0017089);; Biological Process: glycolipid transport (GO:0046836);; Molecular Function: glycolipid binding (GO:0051861);;	--	--	[S]	Function unknown	Glycolipid transfer protein (GLTP)	Accelerated cell death 11 OS=Arabidopsis thaliana OX=3702 GN=ACD11 PE=1 SV=1	U	Intracellular trafficking, secretion, and vesicular transport	accelerated cell death 11 [Quercus suber]	cellular component: cell (GO:0005623);; cellular component: cell part (GO:0044464);; molecular function: transporter activity (GO:0005215);; biological process: single-organism process (GO:0044699);; biological process: localization (GO:0051179);; molecular function: binding (GO:0005488)
EVM0026029	EVM0026029	1.6442	1.16266	0.863659	0.792083	-0.100696	normal	0.961049	-0.0265866	normal	0.996815	-0.0275802	normal	--	--	Biological Process: carbohydrate metabolic process (GO:0005975);; Molecular Function: lyase activity (GO:0016829);; Molecular Function: carbohydrate binding (GO:0030246);;	K18195|0|tcc:TCM_046891|K18195 rhamnogalacturonan endolyase [EC:4.2.2.23] | (RefSeq) Rhamnogalacturonate lyase family protein	--	--	--	Rhamnogalacturonate lyase family;; Polysaccharide lyase family 4, domain III;; Polysaccharide lyase family 4, domain II	--	S	Function unknown	probable rhamnogalacturonate lyase B [Quercus suber]	biological process: metabolic process (GO:0008152);; molecular function: catalytic activity (GO:0003824);; molecular function: binding (GO:0005488)
EVM0025975	EVM0025975	5.48849	7.33702	6.32073	0.00111957	1.06954	up	0.00135715	0.887138	up	0.985492	0.182203	normal	--	--	--	--	--	--	--	Domain of unknown function (DUF296)	AT-hook motif nuclear-localized protein 29 OS=Arabidopsis thaliana OX=3702 GN=AHL29 PE=1 SV=1	S	Function unknown	AT-hook motif nuclear-localized protein 27-like [Quercus suber]	--
EVM0015324	EVM0015324	14.0668	5.5673	2.42315	4.44081e-17	-1.74147	down	6.28568e-05	-0.857025	down	0.740888	-0.712089	normal	[J]	Translation, ribosomal structure and biogenesis	Molecular Function: GTP binding (GO:0005525);; Cellular Component: cytoplasm (GO:0005737);; Molecular Function: ribosome binding (GO:0043022);;	K03665|0|cit:102627252|K03665 GTPase | (RefSeq) GTPase HflX	--	[R]	General function prediction only	GTP-binding GTPase N-terminal;; GTP-binding GTPase Middle Region;; 50S ribosome-binding GTPase;; RsgA GTPase;; Dynamin family;; Ferrous iron transport protein B;; ADP-ribosylation factor family;; CobW/HypB/UreG, nucleotide-binding domain	GTP-binding protein At3g49725, chloroplastic OS=Arabidopsis thaliana OX=3702 GN=At3g49725 PE=2 SV=2	S	Function unknown	uncharacterized protein LOC112015138 [Quercus suber]	molecular function: binding (GO:0005488);; cellular component: cell (GO:0005623);; cellular component: cell part (GO:0044464)
EVM0022402	EVM0022402	17.9296	10.3872	5.81274	0.029395	-0.770674	normal	0.552703	-0.296938	normal	0.982718	-0.272313	normal	--	--	--	--	--	[K]	Transcription	--	Transcription factor E2FA OS=Arabidopsis thaliana OX=3702 GN=E2FA PE=1 SV=1	K	Transcription	transcription factor e2fa [Quercus suber]	--
EVM0030954	EVM0030954	1.33026	0.183911	0.06356	0.00173395	-3.14618	down	0.0167716	-2.08244	normal	--	--	--	--	--	--	--	--	--	--	--	--	--	--	hypothetical protein CFP56_29158 [Quercus suber]	--
Castanea_mollissima_newGene_6040	--	1.39418	0.218747	0.11991	0.000252958	-2.48313	down	1.86726e-05	-2.34964	down	0.996815	-0.0321979	normal	--	--	--	--	--	--	--	--	--	--	--	--	--
EVM0009414	EVM0009414	9.04119	22.8261	8.7296	0.00772002	0.725328	up	3.97246e-14	1.80232	up	0.357764	-0.929043	normal	[N]	Cell motility	Cellular Component: integral component of membrane (GO:0016021);; Molecular Function: cellulose synthase (UDP-forming) activity (GO:0016760);; Biological Process: cellulose biosynthetic process (GO:0030244);; Biological Process: cell wall organization (GO:0071555);;	--	--	--	--	Cellulose synthase;; Glycosyl transferase family group 2	Cellulose synthase-like protein G3 OS=Arabidopsis thaliana OX=3702 GN=CSLG3 PE=2 SV=2	M	Cell wall/membrane/envelope biogenesis	cellulose synthase-like protein G3 isoform X1 [Quercus suber]	cellular component: membrane (GO:0016020);; cellular component: membrane part (GO:0044425);; molecular function: catalytic activity (GO:0003824);; biological process: metabolic process (GO:0008152);; biological process: cellular process (GO:0009987);; biological process: single-organism process (GO:0044699);; biological process: cellular component organization or biogenesis (GO:0071840)
EVM0002883	EVM0002883	0.380688	57.1602	80.532	3.79313e-58	8.50441	up	5.16539e-181	7.62395	up	0.604315	0.823451	normal	[K]	Transcription	Molecular Function: phosphoprotein phosphatase activity (GO:0004721);; Biological Process: protein dephosphorylation (GO:0006470);;	--	--	[R]	General function prediction only	Leucine rich repeat;; Leucine Rich repeats (2 copies);; Leucine Rich Repeat	Plant intracellular Ras-group-related LRR protein 3 OS=Arabidopsis thaliana OX=3702 GN=PIRL3 PE=2 SV=1	S	Function unknown	plant intracellular Ras-group-related LRR protein 3 [Quercus suber]	molecular function: catalytic activity (GO:0003824);; biological process: metabolic process (GO:0008152);; biological process: cellular process (GO:0009987)
EVM0000052	EVM0000052	10.3141	5.26463	2.08426	1.09552e-08	-1.53382	down	0.0122276	-0.494625	normal	0.612191	-0.84191	normal	[K]	Transcription	Biological Process: activation of MAPKK activity (GO:0000186);; Molecular Function: MAP kinase kinase kinase activity (GO:0004709);; Molecular Function: ATP binding (GO:0005524);; Cellular Component: intracellular (GO:0005622);; Cellular Component: integral component of membrane (GO:0016021);; Molecular Function: 2-alkenal reductase [NAD(P)] activity (GO:0032440);; Biological Process: oxidation-r…	--	--	--	--	Protein kinase domain;; Protein tyrosine kinase;; Leucine rich repeat;; Leucine Rich repeats (2 copies);; Leucine rich repeat N-terminal domain;; Leucine Rich Repeat	Probable leucine-rich repeat receptor-like protein kinase At5g49770 OS=Arabidopsis thaliana OX=3702 GN=At5g49770 PE=2 SV=1	S	Function unknown	probable leucine-rich repeat receptor-like protein kinase At5g49770 isoform X2 [Quercus suber]	biological process: biological regulation (GO:0065007);; molecular function: catalytic activity (GO:0003824);; molecular function: signal transducer activity (GO:0004871);; biological process: metabolic process (GO:0008152);; biological process: cellular process (GO:0009987);; biological process: signaling (GO:0023052);; biological process: single-organism process (GO:0044699);; biological proces…
EVM0001195	EVM0001195	2.01373	0.744943	0.378714	2.0959e-05	-1.59745	down	0.0323439	-0.935158	normal	0.97014	-0.362721	normal	[M]	Cell wall/membrane/envelope biogenesis	Cellular Component: integral component of membrane (GO:0016021);; Molecular Function: transferase activity (GO:0016740);;	--	--	--	--	Glycosyl transferases group 1;; Glycosyl transferases group 1;; Glycosyl transferases group 1	--	M	Cell wall/membrane/envelope biogenesis	uncharacterized protein LOC112017932 [Quercus suber]	cellular component: membrane (GO:0016020);; cellular component: membrane part (GO:0044425);; molecular function: catalytic activity (GO:0003824)
EVM0004789	EVM0004789	2.39552	1.02764	0.314072	1.83237e-06	-2.12192	down	0.10877	-0.737893	normal	0.872202	-0.725506	normal	[K]	Transcription	--	--	--	[T]	Signal transduction mechanisms	Leucine rich repeat;; Leucine Rich repeats (2 copies)	Putative disease resistance RPP13-like protein 1 OS=Arabidopsis thaliana OX=3702 GN=RPPL1 PE=3 SV=1	S	Function unknown	putative disease resistance rpp13-like protein 1 [Quercus suber]	--
EVM0010022	EVM0010022	77.8966	130.803	206.772	3.88617e-09	2.29307	up	1.69914e-18	1.21751	up	0.364791	0.973695	normal	--	--	Molecular Function: structural constituent of ribosome (GO:0003735);; Biological Process: translation (GO:0006412);; Biological Process: transport (GO:0006810);; Cellular Component: membrane (GO:0016020);;	K05863|7.42956e-122|adu:107462656|K05863 solute carrier family 25 (mitochondrial adenine nucleotide translocator), member 4/5/6/31 | (RefSeq) ADP,ATP carrier protein 1, mitochondrial-like	--	[C]	Energy production and conversion	Mitochondrial carrier protein;; Translin family	ADP,ATP carrier protein 1, mitochondrial OS=Gossypium hirsutum OX=3635 GN=ANT1 PE=2 SV=1	U	Intracellular trafficking, secretion, and vesicular transport	PREDICTED: ADP,ATP carrier protein 1, mitochondrial [Juglans regia]	molecular function: structural molecule activity (GO:0005198);; biological process: metabolic process (GO:0008152);; biological process: cellular process (GO:0009987);; biological process: localization (GO:0051179);; cellular component: membrane (GO:0016020)
EVM0002005	EVM0002005	1.71517	8.47502	11.107	2.4034e-21	3.54203	up	3.12982e-17	2.73853	up	0.670639	0.715863	normal	[QV]	Secondary metabolites biosynthesis, transport and catabolism;; Defense mechanisms	Molecular Function: monooxygenase activity (GO:0004497);; Molecular Function: iron ion binding (GO:0005506);; Molecular Function: oxidoreductase activity, acting on paired donors, with incorporation or reduction of molecular oxygen (GO:0016705);; Molecular Function: heme binding (GO:0020037);; Biological Process: oxidation-reduction process (GO:0055114);;	K15639|0|pper:PRUPE_ppa004328mg|K15639 PHYB activation tagged suppressor 1 [EC:1.14.-.-] | (RefSeq) hypothetical protein	Brassinosteroid biosynthesis (ko00905)	[QI]	Secondary metabolites biosynthesis, transport and catabolism;; Lipid transport and metabolism	Cytochrome P450	Cytochrome P450 CYP749A22 OS=Panax ginseng OX=4054 PE=2 SV=1	Q	Secondary metabolites biosynthesis, transport and catabolism	cytochrome P450 CYP749A22-like [Quercus suber]	molecular function: catalytic activity (GO:0003824);; biological process: metabolic process (GO:0008152);; biological process: single-organism process (GO:0044699);; molecular function: binding (GO:0005488)
EVM0012323	EVM0012323	12.8299	53.002	64.9172	2.69107e-45	3.10225	up	3.86227e-54	2.51212	up	0.737286	0.572449	normal	[G]	Carbohydrate transport and metabolism	Molecular Function: ATP binding (GO:0005524);;	--	--	[O]	Posttranslational modification, protein turnover, chaperones	ATPase family associated with various cellular activities (AAA)	Ribulose bisphosphate carboxylase/oxygenase activase 1, chloroplastic OS=Larrea tridentata OX=66636 GN=RCA1 PE=1 SV=1	O	Posttranslational modification, protein turnover, chaperones	ribulose bisphosphate carboxylase/oxygenase activase, chloroplastic-like [Quercus suber]	molecular function: binding (GO:0005488)
EVM0007376	EVM0007376	2.27508	15.1374	3.47923	0.00142423	1.36049	up	8.16001e-17	3.15907	up	0.0728069	-1.52508	normal	--	--	Molecular Function: transferase activity, transferring acyl groups other than amino-acyl groups (GO:0016747);;	--	--	--	--	Transferase family	Shikimate O-hydroxycinnamoyltransferase OS=Arabidopsis thaliana OX=3702 GN=HST PE=1 SV=1	S	Function unknown	shikimate O-hydroxycinnamoyltransferase-like [Quercus suber]	molecular function: catalytic activity (GO:0003824)
EVM0004780	EVM0004780	20.3643	37.5628	6.84743	0.0604795	-0.823138	normal	1.61838e-05	1.34976	up	0.0123741	-1.84491	normal	--	--	--	--	--	--	--	No apical meristem (NAM) protein	Protein NTM1-like 9 OS=Arabidopsis thaliana OX=3702 GN=NTL9 PE=1 SV=1	--	--	NAC domain-containing protein 96-like [Quercus suber]	--
EVM0003362	EVM0003362	12.2461	1.33402	0.143964	3.3685e-44	-5.52684	down	2.02165e-25	-2.69706	down	0.321659	-1.54083	normal	--	--	Cellular Component: nucleus (GO:0005634);; Cellular Component: integral component of membrane (GO:0016021);;	K06627|0|pop:POPTR_0002s08020g|K06627 cyclin A | (RefSeq) hypothetical protein	--	[D]	Cell cycle control, cell division, chromosome partitioning	Cyclin, N-terminal domain;; Cyclin, C-terminal domain	Cyclin-A1-1 OS=Arabidopsis thaliana OX=3702 GN=CYCA1-1 PE=1 SV=1	D	Cell cycle control, cell division, chromosome partitioning	LOW QUALITY PROTEIN: cyclin-A1-1-like [Quercus suber]	cellular component: cell (GO:0005623);; cellular component: organelle (GO:0043226);; cellular component: cell part (GO:0044464);; cellular component: membrane (GO:0016020);; cellular component: membrane part (GO:0044425)
EVM0021011	EVM0021011	6.37297	1.5283	0.698434	2.49884e-13	-2.37586	down	2.5485e-05	-1.5586	down	0.932476	-0.516125	normal	[R]	General function prediction only	Biological Process: response to acid chemical (GO:0001101);; Biological Process: response to stress (GO:0006950);; Biological Process: response to oxygen-containing compound (GO:1901700);;	--	--	[S]	Function unknown	--	WD-40 repeat-containing protein MSI2 OS=Arabidopsis thaliana OX=3702 GN=MSI2 PE=2 SV=1	S	Function unknown	WD repeat-containing protein 76 isoform X1 [Quercus suber]	biological process: response to stimulus (GO:0050896)
EVM0010288	EVM0010288	0.643406	1.49831	0.756549	0.0390051	0.998992	normal	0.0112063	1.6091	normal	0.962695	-0.39964	normal	--	--	--	K09422|2.87615e-113|jcu:105631135|K09422 myb proto-oncogene protein, plant | (RefSeq) myb-related protein 308	--	[K]	Transcription	Myb-like DNA-binding domain;; Myb-like DNA-binding domain	Transcription factor MYB86 OS=Arabidopsis thaliana OX=3702 GN=MYB86 PE=2 SV=1	K	Transcription	transcription factor MYB41-like [Quercus suber]	--
EVM0024157	EVM0024157	114.798	197.933	188.886	1.1789e-13	1.55967	up	1.36031e-18	1.25421	up	0.932257	0.308164	normal	[E]	Amino acid transport and metabolism	Molecular Function: aminopeptidase activity (GO:0004177);; Cellular Component: cytoplasm (GO:0005737);; Biological Process: proteolysis (GO:0006508);; Molecular Function: metalloexopeptidase activity (GO:0008235);; Molecular Function: manganese ion binding (GO:0030145);;	K01255|0|pper:PRUPE_ppa003434mg|K01255 leucyl aminopeptidase [EC:3.4.11.1] | (RefSeq) hypothetical protein	Glutathione metabolism (ko00480)	[R]	General function prediction only	Cytosol aminopeptidase family, catalytic domain;; Cytosol aminopeptidase family, N-terminal domain	Leucine aminopeptidase 2, chloroplastic OS=Arabidopsis thaliana OX=3702 GN=LAP2 PE=2 SV=2	E	Amino acid transport and metabolism	leucine aminopeptidase 1-like [Quercus suber]	molecular function: catalytic activity (GO:0003824);; biological process: metabolic process (GO:0008152);; cellular component: cell (GO:0005623);; cellular component: cell part (GO:0044464);; molecular function: binding (GO:0005488)
EVM0025108	EVM0025108	14.9699	29.2986	24.0001	3.29412e-22	1.50214	up	6.38606e-13	1.43555	up	0.993553	0.0883681	normal	--	--	Molecular Function: metal ion binding (GO:0046872);;	--	--	[O]	Posttranslational modification, protein turnover, chaperones	Ring finger domain;; Zinc finger, C3HC4 type (RING finger);; RING-H2 zinc finger domain;; Zinc finger, C3HC4 type (RING finger);; RING-type zinc-finger;; zinc-RING finger domain;; Anaphase-promoting complex subunit 11 RING-H2 finger;; RING-like zinc finger	Probable E3 ubiquitin-protein ligase RHB1A OS=Arabidopsis thaliana OX=3702 GN=RHB1A PE=2 SV=1	O	Posttranslational modification, protein turnover, chaperones	probable E3 ubiquitin-protein ligase RHB1A [Quercus suber]	molecular function: binding (GO:0005488)
EVM0007988	EVM0007988	63.8903	5.25536	0.741565	7.36357e-166	-5.59582	down	1.90918e-73	-3.11946	down	0.0223438	-1.97496	normal	--	--	--	--	--	--	--	PLAC8 family	Protein MID1-COMPLEMENTING ACTIVITY 1 OS=Arabidopsis thaliana OX=3702 GN=MCA1 PE=1 SV=1	S	Function unknown	protein MID1-COMPLEMENTING ACTIVITY 1 [Quercus suber]	--
EVM0013223	EVM0013223	1.03025	0.918488	0.142161	0.00177754	-2.04819	down	0.558976	0.306236	normal	0.459741	-1.33243	normal	[K]	Transcription	--	--	--	--	--	Protein kinase domain;; Protein tyrosine kinase;; Leucine Rich repeats (2 copies);; Leucine rich repeat;; Leucine Rich Repeat;; Leucine Rich repeat	MDIS1-interacting receptor like kinase 2 OS=Arabidopsis thaliana OX=3702 GN=MIK2 PE=1 SV=3	S	Function unknown	MDIS1-interacting receptor like kinase 2-like [Quercus suber]	--
EVM0000853	EVM0000853	11.2204	15.282	15.5252	3.8401e-08	1.31525	up	1.16667e-05	0.917174	up	0.909779	0.385415	normal	[HT]	Coenzyme transport and metabolism;; Signal transduction mechanisms	Molecular Function: protein kinase activity (GO:0004672);; Molecular Function: ATP binding (GO:0005524);; Biological Process: protein phosphorylation (GO:0006468);;	K08869|0|tcc:TCM_042518|K08869 aarF domain-containing kinase | (RefSeq) ABC2	--	[R]	General function prediction only	ABC1 family	Putative ABC1 protein At2g40090 OS=Arabidopsis thaliana OX=3702 GN=At2g40090 PE=2 SV=2	S	Function unknown	putative ABC1 protein At2g40090 [Quercus suber]	molecular function: catalytic activity (GO:0003824);; biological process: metabolic process (GO:0008152);; biological process: cellular process (GO:0009987);; molecular function: binding (GO:0005488)
EVM0022187	EVM0022187	8.0973	2.64924	0.851962	5.04141e-10	-2.37672	down	0.00530312	-1.12004	down	0.79942	-0.821114	normal	[T]	Signal transduction mechanisms	Biological Process: response to stress (GO:0006950);;	--	--	--	--	Universal stress protein family	Universal stress protein A-like protein OS=Arabidopsis thaliana OX=3702 GN=At3g01520 PE=1 SV=2	T	Signal transduction mechanisms	PREDICTED: uncharacterized protein LOC109011906 isoform X2 [Juglans regia]	biological process: response to stimulus (GO:0050896)
EVM0003177	EVM0003177	304.953	1236.3	991.375	5.28831e-49	2.53433	up	1.48491e-82	2.48948	up	0.993851	0.0711221	normal	--	--	Cellular Component: integral component of membrane (GO:0016021);;	--	--	--	--	Late embryogenesis abundant protein	NDR1/HIN1-like protein 1 OS=Arabidopsis thaliana OX=3702 GN=NHL1 PE=2 SV=1	S	Function unknown	NDR1/HIN1-like protein 1 [Quercus suber]	cellular component: membrane (GO:0016020);; cellular component: membrane part (GO:0044425)
EVM0016471	EVM0016471	18.3747	0.563992	0.172878	2.80729e-37	-5.80287	down	2.07587e-33	-4.4321	down	--	--	--	--	--	Biological Process: phloem or xylem histogenesis (GO:0010087);; Biological Process: leaf vascular tissue pattern formation (GO:0010305);; Biological Process: cotyledon vascular tissue pattern formation (GO:0010588);; Cellular Component: integral component of membrane (GO:0016021);;	--	--	--	--	Protein of unknown function (DUF1218)	--	S	Function unknown	uncharacterized protein LOC111983972 [Quercus suber]	biological process: developmental process (GO:0032502);; biological process: multicellular organismal process (GO:0032501);; biological process: single-organism process (GO:0044699);; biological process: reproduction (GO:0000003);; biological process: reproductive process (GO:0022414);; cellular component: membrane (GO:0016020);; cellular component: membrane part (GO:0044425)
EVM0015635	EVM0015635	0.752561	0.065392	0	1.77085e-05	-7.01973	down	0.000194641	-2.80926	down	--	--	--	[M]	Cell wall/membrane/envelope biogenesis	Molecular Function: kinase activity (GO:0016301);;	--	--	[T]	Signal transduction mechanisms	Carbohydrate-binding protein of the ER;; Protein tyrosine kinase;; Protein kinase domain;; Di-glucose binding within endoplasmic reticulum	Receptor-like protein kinase FERONIA OS=Arabidopsis thaliana OX=3702 GN=FER PE=1 SV=1	T	Signal transduction mechanisms	receptor-like protein kinase FERONIA [Quercus suber]	molecular function: catalytic activity (GO:0003824)
EVM0009864	EVM0009864	12.2173	71.3104	237.535	3.00322e-21	5.14066	up	2.21803e-25	2.992	up	0.0210901	1.84524	normal	--	--	Cellular Component: nucleus (GO:0005634);;	--	--	--	--	Protein of unknown function (DUF1997)	--	S	Function unknown	uncharacterized protein LOC111998635 [Quercus suber]	cellular component: cell (GO:0005623);; cellular component: organelle (GO:0043226);; cellular component: cell part (GO:0044464)
EVM0009524	EVM0009524	17.0569	6.51941	4.39046	5.69723e-15	-1.15517	down	1.00269e-07	-0.910308	down	0.982718	-0.181334	normal	[R]	General function prediction only	Molecular Function: GTP binding (GO:0005525);; Cellular Component: nucleolus (GO:0005730);; Biological Process: ribosome biogenesis (GO:0042254);;	K06943|0|tcc:TCM_025126|K06943 nucleolar GTP-binding protein | (RefSeq) Nucleolar GTP-binding protein	Ribosome biogenesis in eukaryotes (ko03008)	[R]	General function prediction only	NOGCT (NUC087) domain;; Nucleolar GTP-binding protein 1 (NOG1);; 50S ribosome-binding GTPase;; Ferrous iron transport protein B	Nucleolar GTP-binding protein 1 OS=Arabidopsis thaliana OX=3702 GN=At1g50920 PE=2 SV=1	S	Function unknown	nucleolar GTP-binding protein 1-like [Quercus suber]	molecular function: binding (GO:0005488);; cellular component: cell (GO:0005623);; cellular component: organelle (GO:0043226);; cellular component: organelle part (GO:0044422);; cellular component: cell part (GO:0044464);; biological process: cellular component organization or biogenesis (GO:0071840)
EVM0027961	EVM0027961	15.5299	19.2338	25.9229	1.41158e-07	1.60386	up	0.000218516	0.780169	up	0.548489	0.761895	normal	[U]	Intracellular trafficking, secretion, and vesicular transport	Molecular Function: protein kinase activity (GO:0004672);; Molecular Function: ATP binding (GO:0005524);; Biological Process: protein phosphorylation (GO:0006468);;	K14500|0|vvi:100256923|K14500 BR-signaling kinase [EC:2.7.11.1] | (RefSeq) probable serine/threonine-protein kinase At5g41260	--	--	--	Protein tyrosine kinase;; Protein kinase domain	Serine/threonine-protein kinase BSK5 OS=Arabidopsis thaliana OX=3702 GN=BSK5 PE=1 SV=1	T	Signal transduction mechanisms	probable serine/threonine-protein kinase BSK3 [Quercus suber]	molecular function: catalytic activity (GO:0003824);; biological process: metabolic process (GO:0008152);; biological process: cellular process (GO:0009987);; molecular function: binding (GO:0005488)
EVM0007177	EVM0007177	57.9328	180.78	107.106	0.00140001	1.62812	up	0.0366698	1.92764	normal	0.911093	-0.372673	normal	--	--	Cellular Component: extracellular region (GO:0005576);; Cellular Component: cell wall (GO:0005618);; Biological Process: plant-type cell wall organization (GO:0009664);; Cellular Component: membrane (GO:0016020);;	--	--	--	--	Pollen allergen;; Lytic transglycolase	Expansin-A8 OS=Arabidopsis thaliana OX=3702 GN=EXPA8 PE=2 SV=1	G	Carbohydrate transport and metabolism	expansin-A8-like [Quercus suber]	cellular component: extracellular region (GO:0005576);; cellular component: cell (GO:0005623);; cellular component: cell part (GO:0044464);; biological process: cellular process (GO:0009987);; biological process: cellular component organization or biogenesis (GO:0071840);; cellular component: membrane (GO:0016020)
EVM0003874	EVM0003874	24.2879	29.0316	33.7875	1.29176e-10	1.31361	up	3.60145e-05	0.727444	up	0.731972	0.562477	normal	--	--	Molecular Function: transcription factor activity, sequence-specific DNA binding (GO:0003700);; Molecular Function: sequence-specific DNA binding (GO:0043565);; Biological Process: positive regulation of transcription, DNA-templated (GO:0045893);;	--	--	--	--	WRKY DNA -binding domain	Probable WRKY transcription factor 20 OS=Arabidopsis thaliana OX=3702 GN=WRKY20 PE=2 SV=1	K	Transcription	probable WRKY transcription factor 20 isoform X1 [Quercus suber]	molecular function: nucleic acid binding transcription factor activity (GO:0001071);; biological process: biological regulation (GO:0065007);; molecular function: binding (GO:0005488)
EVM0012113	EVM0012113	22.0268	5.85896	3.70975	1.94989e-17	-1.7743	down	1.05488e-11	-1.42665	down	0.975857	-0.253684	normal	--	--	Molecular Function: DNA binding (GO:0003677);;	--	--	[R]	General function prediction only	Telomeric single stranded DNA binding POT1/CDC13	Protection of telomeres protein 1b OS=Arabidopsis thaliana OX=3702 GN=POT1B PE=1 SV=1	S	Function unknown	protection of telomeres protein 1b-like isoform X1 [Quercus suber]	molecular function: binding (GO:0005488)
EVM0009441	EVM0009441	7.89055	55.7843	73.5019	2.55435e-69	4.05197	up	1.36548e-55	3.28044	up	0.507255	0.728148	normal	--	--	Biological Process: proteasome-mediated ubiquitin-dependent protein catabolic process (GO:0043161);; Molecular Function: ubiquitin protein ligase activity (GO:0061630);;	--	--	[O]	Posttranslational modification, protein turnover, chaperones	Ring finger domain;; RING-like zinc finger;; RING-H2 zinc finger domain;; Zinc finger, C3HC4 type (RING finger);; Zinc finger, C3HC4 type (RING finger);; Anaphase-promoting complex subunit 11 RING-H2 finger	RING-H2 finger protein ATL54 OS=Arabidopsis thaliana OX=3702 GN=ATL54 PE=2 SV=2	O	Posttranslational modification, protein turnover, chaperones	RING-H2 finger protein ATL54-like [Quercus suber]	biological process: metabolic process (GO:0008152);; biological process: cellular process (GO:0009987);; molecular function: catalytic activity (GO:0003824)
EVM0030357	EVM0030357	147.141	6.4242	1.50553	2.07112e-147	-5.80869	down	4.41715e-125	-4.03051	down	0.149312	-1.44222	normal	--	--	--	K15404|0|pper:PRUPE_ppa002893mg|K15404 aldehyde decarbonylase [EC:4.1.99.5] | (RefSeq) hypothetical protein	Cutin, suberine and wax biosynthesis (ko00073)	--	--	WAX2 C-terminal domain;; Fatty acid hydroxylase superfamily	Protein ECERIFERUM 1 OS=Arabidopsis thaliana OX=3702 GN=CER1 PE=1 SV=1	S	Function unknown	protein ECERIFERUM 1-like isoform X1 [Quercus suber]	--
Castanea_mollissima_newGene_617	--	138.856	33.7243	4.53342	2.4047e-19	-4.10659	down	0.0641333	-1.48357	normal	0.00522001	-2.11848	down	--	--	--	--	--	--	--	--	--	--	--	hypothetical protein CFP56_55491 [Quercus suber]	--
EVM0028359	EVM0028359	7.29939	0.304016	0.131173	1.69506e-37	-4.85621	down	8.37963e-28	-4.02487	down	--	--	--	--	--	--	--	--	--	--	PHD - plant homeodomain finger protein	Protein VERNALIZATION INSENSITIVE 3 OS=Arabidopsis thaliana OX=3702 GN=VIN3 PE=1 SV=2	S	Function unknown	protein vernalization insensitive 3 [Quercus suber]	--
Castanea_mollissima_newGene_2806	--	2.91906	8.1578	10.5757	2.87654e-24	2.46492	up	3.15246e-05	1.76075	up	0.823158	0.601951	normal	--	--	--	--	--	--	--	--	--	--	--	putative ribonuclease h protein [Quercus suber]	--
EVM0022990	EVM0022990	130.509	45.2373	19.6256	1.35768e-13	-1.96714	down	1.546e-10	-1.05375	down	0.516877	-0.781149	normal	--	--	Cellular Component: vacuolar membrane (GO:0005774);; Cellular Component: plasma membrane (GO:0005886);; Cellular Component: plasmodesma (GO:0009506);; Cellular Component: chloroplast envelope (GO:0009941);; Cellular Component: integral component of membrane (GO:0016021);;	--	--	[R]	General function prediction only	Calcium-dependent channel, 7TM region, putative phosphate;; Cytosolic domain of 10TM putative phosphate transporter;; Late exocytosis, associated with Golgi transport	CSC1-like protein ERD4 OS=Arabidopsis thaliana OX=3702 GN=ERD4 PE=2 SV=1	S	Function unknown	CSC1-like protein ERD4 [Quercus suber]	cellular component: cell (GO:0005623);; cellular component: membrane (GO:0016020);; cellular component: organelle (GO:0043226);; cellular component: organelle part (GO:0044422);; cellular component: cell part (GO:0044464);; cellular component: cell junction (GO:0030054);; cellular component: membrane part (GO:0044425)
EVM0001462	EVM0001462	0.22612	0.023332	0.0060495	4.00353e-06	-4.01808	down	0.00160564	-2.47042	down	--	--	--	--	--	Molecular Function: mechanically-gated ion channel activity (GO:0008381);; Cellular Component: integral component of membrane (GO:0016021);; Biological Process: ion transmembrane transport (GO:0034220);;	--	--	[S]	Function unknown	Piezo non-specific cation channel, R-Ras-binding domain	Piezo-type mechanosensitive ion channel homolog OS=Arabidopsis thaliana OX=3702 GN=At2g48060/At2g48040/At2g48050 PE=2 SV=1	S	Function unknown	piezo-type mechanosensitive ion channel homolog isoform X2 [Quercus suber]	molecular function: transporter activity (GO:0005215);; biological process: localization (GO:0051179);; cellular component: membrane (GO:0016020);; cellular component: membrane part (GO:0044425)
EVM0015249	EVM0015249	0.795861	0.418927	0.168061	0.000888902	-1.4016	down	0.452377	-0.422437	normal	0.931087	-0.544547	normal	--	--	--	--	--	--	--	TIR domain;; NB-ARC domain;; TIR domain	Disease resistance-like protein DSC1 OS=Arabidopsis thaliana OX=3702 GN=DSC1 PE=1 SV=1	S	Function unknown	TMV resistance protein N-like [Quercus suber]	--
EVM0008914	EVM0008914	4.31532	9.32299	7.60666	6.52681e-13	1.63214	up	9.30204e-07	1.57082	up	0.994485	0.0744783	normal	[O]	Posttranslational modification, protein turnover, chaperones	Molecular Function: glutathione transferase activity (GO:0004364);; Cellular Component: cytoplasm (GO:0005737);; Cellular Component: plasma membrane (GO:0005886);; Biological Process: glutathione metabolic process (GO:0006749);;	--	--	[S]	Function unknown	Glutathione S-transferase, N-terminal domain;; Glutathione S-transferase, N-terminal domain;; Glutathione S-transferase, N-terminal domain;; Glutathione S-transferase, C-terminal domain;; Glutathione S-transferase, C-terminal domain;; Glutathione S-transferase, C-terminal domain	Glutathione S-transferase TCHQD OS=Arabidopsis thaliana OX=3702 GN=TCHQD PE=2 SV=1	U	Intracellular trafficking, secretion, and vesicular transport	glutathione S-transferase TCHQD [Quercus suber]	molecular function: catalytic activity (GO:0003824);; cellular component: cell (GO:0005623);; cellular component: cell part (GO:0044464);; cellular component: membrane (GO:0016020);; biological process: metabolic process (GO:0008152);; biological process: cellular process (GO:0009987)
EVM0033206	EVM0033206	3.83414	0.013185	0.124441	1.2097e-06	-4.01777	down	2.60033e-09	-5.99475	down	--	--	--	[K]	Transcription	Molecular Function: kinase activity (GO:0016301);; Biological Process: phosphorylation (GO:0016310);; Molecular Function: 2-alkenal reductase [NAD(P)] activity (GO:0032440);; Biological Process: oxidation-reduction process (GO:0055114);;	--	--	[R]	General function prediction only	Leucine rich repeat;; Leucine Rich repeats (2 copies);; Leucine Rich Repeat;; Leucine Rich repeat	Protein TOO MANY MOUTHS OS=Arabidopsis thaliana OX=3702 GN=TMM PE=1 SV=1	S	Function unknown	leucine-rich repeat receptor-like serine/threonine-protein kinase BAM1 [Quercus suber]	molecular function: catalytic activity (GO:0003824);; biological process: metabolic process (GO:0008152);; biological process: cellular process (GO:0009987);; biological process: single-organism process (GO:0044699)
EVM0032647	EVM0032647	18.7115	30.4038	37.4125	6.33427e-14	1.84922	up	2.84608e-11	1.1691	up	0.663867	0.640603	normal	--	--	Molecular Function: structural constituent of ribosome (GO:0003735);; Biological Process: translation (GO:0006412);; Cellular Component: integral component of membrane (GO:0016021);; Biological Process: transmembrane transport (GO:0055085);;	--	--	[C]	Energy production and conversion	Mitochondrial carrier protein	Peroxisomal adenine nucleotide carrier 1 OS=Arabidopsis thaliana OX=3702 GN=PNC1 PE=1 SV=1	S	Function unknown	peroxisomal adenine nucleotide carrier 1-like [Quercus suber]	molecular function: structural molecule activity (GO:0005198);; biological process: metabolic process (GO:0008152);; biological process: cellular process (GO:0009987);; cellular component: membrane (GO:0016020);; cellular component: membrane part (GO:0044425);; biological process: localization (GO:0051179)
EVM0016036	EVM0016036	2.0375	2.08804	2.11686	0.0919366	0.936535	normal	0.458096	0.504009	normal	0.976107	0.307742	normal	--	--	Cellular Component: membrane (GO:0016020);;	--	--	--	--	Late embryogenesis abundant protein	Late embryogenesis abundant protein At1g64065 OS=Arabidopsis thaliana OX=3702 GN=At1g64065 PE=2 SV=1	S	Function unknown	late embryogenesis abundant protein At1g64065-like [Quercus suber]	cellular component: membrane (GO:0016020)
EVM0027853	EVM0027853	8.36051	133.29	104.855	1.0557e-30	4.41513	up	1.3162e-21	4.34965	up	0.996071	0.0334047	normal	--	--	--	K01611|6.24423e-18|vvi:104877289|K01611 S-adenosylmethionine decarboxylase [EC:4.1.1.50] | (RefSeq) S-adenosylmethionine decarboxylase proenzyme	--	--	--	S-adenosyl-l-methionine decarboxylase leader peptide	--	S	Function unknown	unnamed protein product, partial [Vitis vinifera]	--
EVM0015577	EVM0015577	22.9146	0.042142	0.0237135	4.62889e-23	-8.66142	down	6.90779e-24	-7.85497	down	--	--	--	--	--	--	--	--	--	--	Myb/SANT-like DNA-binding domain	Trihelix transcription factor ASR3 OS=Arabidopsis thaliana OX=3702 GN=ASR3 PE=1 SV=1	S	Function unknown	uncharacterized protein LOC111997125 isoform X1 [Quercus suber]	--
EVM0009242	EVM0009242	172.862	248.756	160.963	2.68006e-05	0.686309	up	3.15437e-10	0.993045	up	0.95754	-0.245808	normal	--	--	Cellular Component: mitochondrion (GO:0005739);; Cellular Component: integral component of membrane (GO:0016021);; Biological Process: negative regulation of ATPase activity (GO:0032780);; Molecular Function: ATPase inhibitor activity (GO:0042030);;	--	--	--	--	Mitochondrial ATPase inhibitor, IATP	--	S	Function unknown	uncharacterized protein At2g27730, mitochondrial [Quercus suber]	cellular component: cell (GO:0005623);; cellular component: organelle (GO:0043226);; cellular component: cell part (GO:0044464);; cellular component: membrane (GO:0016020);; cellular component: membrane part (GO:0044425);; biological process: biological regulation (GO:0065007);; molecular function: molecular function regulator (GO:0098772)
EVM0011307	EVM0011307	512.155	21.9237	2.96512	1.42593e-256	-6.60998	down	7.56853e-109	-4.05955	down	0.000425411	-2.2088	down	[IR]	Lipid transport and metabolism;; General function prediction only	Molecular Function: hydrolase activity, acting on ester bonds (GO:0016788);;	--	--	--	--	GDSL-like Lipase/Acylhydrolase	GDSL esterase/lipase At5g33370 OS=Arabidopsis thaliana OX=3702 GN=At5g33370 PE=2 SV=1	S	Function unknown	GDSL esterase/lipase At5g33370-like [Quercus suber]	molecular function: catalytic activity (GO:0003824)
EVM0031158	EVM0031158	6.86042	4.12391	1.19608	3.4294e-10	-1.71776	down	0.426428	-0.252579	normal	0.324213	-1.18039	normal	[K]	Transcription	--	--	--	[R]	General function prediction only	Leucine rich repeat;; Leucine Rich repeats (2 copies);; Leucine Rich Repeat;; Leucine rich repeat N-terminal domain;; Leucine Rich repeat	Receptor-like protein EIX2 OS=Solanum lycopersicum OX=4081 GN=EIX2 PE=1 SV=2	S	Function unknown	receptor-like protein 12 [Quercus suber]	--
EVM0014262	EVM0014262	6.26135	21.6211	32.963	1.11359e-07	3.29006	up	1.0286e-15	2.24059	up	0.657034	0.875593	normal	--	--	--	--	--	--	--	zinc-finger of the FCS-type, C2-C2	Protein MARD1 OS=Arabidopsis thaliana OX=3702 GN=MARD1 PE=2 SV=2	S	Function unknown	uncharacterized protein LOC112033329 [Quercus suber]	--
EVM0031921	EVM0031921	7.42539	10.6808	8.11299	8.22755e-05	0.909812	up	0.000149079	0.993208	up	0.995177	-0.0414799	normal	--	--	Cellular Component: integral component of membrane (GO:0016021);;	--	--	[S]	Function unknown	Uncharacterized conserved domain (SAYSvFN)	--	S	Function unknown	uncharacterized protein LOC112005466 [Quercus suber]	cellular component: membrane (GO:0016020);; cellular component: membrane part (GO:0044425)
EVM0008845	EVM0008845	45.6498	6.63281	0.906045	4.81118e-79	-4.85782	down	2.3802e-38	-2.3017	down	0.0210901	-2.02535	normal	--	--	Cellular Component: nucleus (GO:0005634);;	K14505|8.30684e-175|pper:PRUPE_ppa007350mg|K14505 cyclin D3, plant | (RefSeq) hypothetical protein	Plant hormone signal transduction (ko04075)	[D]	Cell cycle control, cell division, chromosome partitioning	Cyclin, N-terminal domain;; Cyclin, C-terminal domain	Cyclin-D3-2 OS=Arabidopsis thaliana OX=3702 GN=CYCD3-2 PE=1 SV=1	D	Cell cycle control, cell division, chromosome partitioning	cyclin-D3-2-like [Quercus suber]	cellular component: cell (GO:0005623);; cellular component: organelle (GO:0043226);; cellular component: cell part (GO:0044464)
EVM0003943	EVM0003943	1.67398	0.677117	0.33795	0.000236808	-1.43933	down	0.102009	-0.800058	normal	0.968949	-0.367056	normal	--	--	Molecular Function: zinc ion binding (GO:0008270);;	--	--	[R]	General function prediction only	PPR repeat family;; PPR repeat;; PPR repeat;; Pentatricopeptide repeat domain;; Pentacotripeptide-repeat region of PRORP;; DYW family of nucleic acid deaminases	Pentatricopeptide repeat-containing protein At4g39530 OS=Arabidopsis thaliana OX=3702 GN=PCMP-E52 PE=3 SV=1	S	Function unknown	pentatricopeptide repeat-containing protein At2g13600-like [Quercus suber]	molecular function: binding (GO:0005488)
EVM0011080	EVM0011080	2.25715	0.971872	0.403292	0.000196256	-1.70221	down	0.138766	-0.732995	normal	0.93476	-0.53488	normal	--	--	--	--	--	--	--	--	--	S	Function unknown	hypothetical protein CFP56_57370 [Quercus suber]	--
EVM0024658	EVM0024658	2.35593	0.90487	0.490308	5.32638e-06	-1.45228	down	0.0361111	-0.88512	normal	0.974936	-0.329079	normal	--	--	Molecular Function: calcium ion binding (GO:0005509);; Molecular Function: calcium-dependent phospholipid binding (GO:0005544);; Cellular Component: plasma membrane (GO:0005886);;	--	--	--	--	C2 domain;; Plant phosphoribosyltransferase C-terminal	FT-interacting protein 1 OS=Arabidopsis thaliana OX=3702 GN=FTIP1 PE=1 SV=1	S	Function unknown	FT-interacting protein 1-like [Quercus suber]	molecular function: binding (GO:0005488);; cellular component: cell (GO:0005623);; cellular component: membrane (GO:0016020);; cellular component: cell part (GO:0044464)
EVM0025804	EVM0025804	14.0493	110.76	184.279	1.41865e-167	4.51745	up	3.66004e-64	3.4328	up	0.167514	1.01766	normal	--	--	--	--	--	--	--	Domain of unknown function (DUF569);; Fascin domain	--	S	Function unknown	uncharacterized protein LOC111995812 [Quercus suber]	--
EVM0000379	EVM0000379	14.7056	145.09	266.728	4.78953e-67	5.01258	up	7.8804e-46	3.75386	up	0.0920803	1.16962	normal	[G]	Carbohydrate transport and metabolism	Biological Process: biosynthetic process (GO:0009058);; Cellular Component: integral component of membrane (GO:0016021);; Molecular Function: strictosidine synthase activity (GO:0016844);;	--	--	[R]	General function prediction only	Strictosidine synthase;; SMP-30/Gluconolaconase/LRE-like region;; NHL repeat	Protein STRICTOSIDINE SYNTHASE-LIKE 5 OS=Arabidopsis thaliana OX=3702 GN=SSL5 PE=2 SV=1	G	Carbohydrate transport and metabolism	protein STRICTOSIDINE SYNTHASE-LIKE 5-like isoform X2 [Quercus suber]	biological process: metabolic process (GO:0008152);; cellular component: membrane (GO:0016020);; cellular component: membrane part (GO:0044425);; molecular function: catalytic activity (GO:0003824)
Castanea_mollissima_newGene_5443	--	7.17684	1.7841	0.99297	6.27389e-10	-2.06448	down	6.10082e-07	-1.56247	down	0.957759	-0.358986	normal	--	--	--	--	--	[R]	General function prediction only	--	Preprotein translocase subunit SCY2, chloroplastic OS=Arabidopsis thaliana OX=3702 GN=SCY2 PE=2 SV=1	S	Function unknown	uncharacterized protein LOC111987155 [Quercus suber]	--
Castanea_mollissima_newGene_2104	--	3.32187	1.05385	0.436367	1.07482e-06	-1.94956	down	0.0213244	-1.02344	normal	0.936044	-0.521772	normal	--	--	--	--	--	--	--	--	--	--	--	--	--
EVM0008734	EVM0008734	26.5059	100.057	81.0714	2.753e-52	2.43077	up	6.47921e-38	2.38321	up	0.994034	0.0712027	normal	--	--	Cellular Component: cytosol (GO:0005829);; Molecular Function: zinc ion binding (GO:0008270);; Cellular Component: integral component of membrane (GO:0016021);;	--	--	[O]	Posttranslational modification, protein turnover, chaperones	--	E3 ubiquitin-protein ligase AIRP2 OS=Arabidopsis thaliana OX=3702 GN=AIRP2 PE=1 SV=1	S	Function unknown	uncharacterized protein LOC112006362 [Quercus suber]	cellular component: cell (GO:0005623);; cellular component: cell part (GO:0044464);; molecular function: binding (GO:0005488);; cellular component: membrane (GO:0016020);; cellular component: membrane part (GO:0044425)
EVM0001805	EVM0001805	41.9246	65.0385	82.0542	1.73789e-12	1.82459	up	2.60477e-16	1.10369	up	0.605948	0.680608	normal	[T]	Signal transduction mechanisms	Molecular Function: phosphoprotein phosphatase activity (GO:0004721);; Biological Process: protein dephosphorylation (GO:0006470);; Molecular Function: metal ion binding (GO:0046872);;	K06269|7.07334e-179|mdm:103433904|K06269 serine/threonine-protein phosphatase PP1 catalytic subunit [EC:3.1.3.16] | (RefSeq) serine/threonine-protein phosphatase PP1	mRNA surveillance pathway (ko03015)	[TR]	Signal transduction mechanisms;; General function prediction only	Calcineurin-like phosphoesterase	Serine/threonine-protein phosphatase PP1 isozyme 8 OS=Arabidopsis thaliana OX=3702 GN=TOPP8 PE=1 SV=3	T	Signal transduction mechanisms	serine/threonine-protein phosphatase PP1 isoform X1 [Quercus suber]	molecular function: catalytic activity (GO:0003824);; biological process: metabolic process (GO:0008152);; biological process: cellular process (GO:0009987);; molecular function: binding (GO:0005488)
EVM0022614	EVM0022614	9.74782	0.883139	0.352648	1.5623e-37	-3.97064	down	4.06016e-32	-2.96227	down	0.904848	-0.629338	normal	[T]	Signal transduction mechanisms	Molecular Function: lysophospholipase activity (GO:0004622);; Molecular Function: voltage-gated potassium channel activity (GO:0005249);; Cellular Component: integral component of membrane (GO:0016021);; Biological Process: potassium ion transmembrane transport (GO:0071805);;	--	--	[PT]	Inorganic ion transport and metabolism;; Signal transduction mechanisms	Ankyrin repeats (many copies);; Ankyrin repeats (3 copies);; KHA, dimerisation domain of potassium ion channel;; Ion transport protein;; Ankyrin repeat;; Ankyrin repeats (many copies);; Ankyrin repeat;; Cyclic nucleotide-binding domain;; Ion channel	Potassium channel SKOR OS=Arabidopsis thaliana OX=3702 GN=SKOR PE=1 SV=1	U	Intracellular trafficking, secretion, and vesicular transport	potassium channel skor [Quercus suber]	molecular function: catalytic activity (GO:0003824);; molecular function: transporter activity (GO:0005215);; biological process: cellular process (GO:0009987);; biological process: single-organism process (GO:0044699);; biological process: localization (GO:0051179);; biological process: biological regulation (GO:0065007);; cellular component: membrane (GO:0016020);; cellular component: membrane …
EVM0000898	EVM0000898	18.5497	6.2778	2.84575	3.34528e-09	-1.93823	down	4.39964e-06	-1.08332	down	0.788847	-0.674706	normal	[QV]	Secondary metabolites biosynthesis, transport and catabolism;; Defense mechanisms	Molecular Function: iron ion binding (GO:0005506);; Molecular Function: heme binding (GO:0020037);; Biological Process: oxidation-reduction process (GO:0055114);; Molecular Function: aromatase activity (GO:0070330);;	--	--	[QI]	Secondary metabolites biosynthesis, transport and catabolism;; Lipid transport and metabolism	Cytochrome P450	Cytochrome P450 97B2, chloroplastic OS=Glycine max OX=3847 GN=CYP97B2 PE=2 SV=1	Q	Secondary metabolites biosynthesis, transport and catabolism	cytochrome P450 97B2, chloroplastic [Quercus suber]	molecular function: binding (GO:0005488);; biological process: metabolic process (GO:0008152);; biological process: single-organism process (GO:0044699);; molecular function: catalytic activity (GO:0003824)
EVM0014057	EVM0014057	5.9126	5.90035	8.64569	4.25706e-07	1.37978	up	0.188301	0.458882	normal	0.549042	0.826404	normal	--	--	Biological Process: embryo development ending in seed dormancy (GO:0009793);; Biological Process: regulation of seed germination (GO:0010029);; Biological Process: maintenance of seed dormancy by absisic acid (GO:0098755);;	--	--	--	--	GRAM domain	GEM-like protein 5 OS=Arabidopsis thaliana OX=3702 GN=At5g13200 PE=1 SV=1	S	Function unknown	GEM-like protein 5 [Quercus suber]	biological process: reproduction (GO:0000003);; biological process: reproductive process (GO:0022414);; biological process: multicellular organismal process (GO:0032501);; biological process: developmental process (GO:0032502);; biological process: single-organism process (GO:0044699);; biological process: biological regulation (GO:0065007)
EVM0008084	EVM0008084	13.872	33.578	33.414	2.43269e-23	2.09896	up	7.93098e-18	1.73859	up	0.913237	0.354871	normal	--	--	Cellular Component: integral component of membrane (GO:0016021);; Biological Process: transmembrane transport (GO:0055085);;	--	--	[S]	Function unknown	Membrane transport protein	Protein PIN-LIKES 2 OS=Arabidopsis thaliana OX=3702 GN=PILS2 PE=2 SV=1	S	Function unknown	protein PIN-LIKES 2 [Quercus suber]	cellular component: membrane (GO:0016020);; cellular component: membrane part (GO:0044425);; biological process: localization (GO:0051179)
EVM0005797	EVM0005797	21.963	52.0366	57.7355	8.50296e-23	2.23904	up	2.93179e-28	1.71237	up	0.797734	0.507213	normal	[U]	Intracellular trafficking, secretion, and vesicular transport	Molecular Function: protein kinase activity (GO:0004672);; Molecular Function: ATP binding (GO:0005524);; Biological Process: protein phosphorylation (GO:0006468);;	--	--	[T]	Signal transduction mechanisms	Protein tyrosine kinase;; Protein kinase domain	Probable serine/threonine-protein kinase PIX7 OS=Arabidopsis thaliana OX=3702 GN=PIX7 PE=1 SV=1	T	Signal transduction mechanisms	probable serine/threonine-protein kinase PBL1 [Quercus suber]	molecular function: catalytic activity (GO:0003824);; biological process: metabolic process (GO:0008152);; biological process: cellular process (GO:0009987);; molecular function: binding (GO:0005488)
EVM0028585	EVM0028585	2.26953	0	0	8.8489e-05	-6.58021	down	6.9386e-05	-5.24455	down	--	--	--	--	--	Cellular Component: nucleosome (GO:0000786);; Molecular Function: DNA binding (GO:0003677);; Cellular Component: nucleus (GO:0005634);; Molecular Function: protein heterodimerization activity (GO:0046982);;	K11252|1.98393e-43|pmum:103327455|K11252 histone H2B | (RefSeq) histone H2B.2	--	[B]	Chromatin structure and dynamics	Core histone H2A/H2B/H3/H4	Histone H2B.5 OS=Triticum aestivum OX=4565 PE=1 SV=3	B	Chromatin structure and dynamics	late histone H2B.L4-like [Quercus suber]	cellular component: cell (GO:0005623);; cellular component: macromolecular complex (GO:0032991);; cellular component: organelle (GO:0043226);; cellular component: organelle part (GO:0044422);; cellular component: cell part (GO:0044464);; molecular function: binding (GO:0005488)
EVM0031042	EVM0031042	57.7822	21.8574	7.29205	8.5235e-28	-2.17845	down	2.40948e-05	-0.92968	down	0.184548	-1.08926	normal	[E]	Amino acid transport and metabolism	Molecular Function: leukotriene-A4 hydrolase activity (GO:0004463);; Cellular Component: cytosol (GO:0005829);; Cellular Component: plasma membrane (GO:0005886);; Biological Process: proteolysis (GO:0006508);; Molecular Function: zinc ion binding (GO:0008270);; Molecular Function: peptide binding (GO:0042277);; Biological Process: peptide catabolic process (GO:0043171);; Molecular Function: metal…	--	--	[IOVE]	Lipid transport and metabolism;; Posttranslational modification, protein turnover, chaperones;; Defense mechanisms;; Amino acid transport and metabolism	Peptidase family M1 domain;; Leukotriene A4 hydrolase, C-terminal	Leukotriene A-4 hydrolase homolog OS=Arabidopsis thaliana OX=3702 GN=LKHA4 PE=2 SV=1	E	Amino acid transport and metabolism	leukotriene A-4 hydrolase homolog [Quercus suber]	molecular function: catalytic activity (GO:0003824);; cellular component: cell (GO:0005623);; cellular component: cell part (GO:0044464);; cellular component: membrane (GO:0016020);; biological process: metabolic process (GO:0008152);; molecular function: binding (GO:0005488);; biological process: cellular process (GO:0009987)
EVM0010264	EVM0010264	0.327493	0.709381	1.88806	6.07646e-08	3.26881	up	0.185703	1.3899	normal	0.452023	1.23611	normal	--	--	--	--	--	--	--	Protein of unknown function (DUF629)	--	--	--	hypothetical protein CFP56_26660 [Quercus suber]	--
EVM0012364	EVM0012364	0.481109	6.31068	16.485	0.0037666	4.87337	up	0.196299	2.1753	normal	0.0305775	1.57312	normal	[QV]	Secondary metabolites biosynthesis, transport and catabolism;; Defense mechanisms	Molecular Function: monooxygenase activity (GO:0004497);; Biological Process: sterol metabolic process (GO:0016125);; Molecular Function: metal ion binding (GO:0046872);;	K01723|0|vvi:100264033|K01723 hydroperoxide dehydratase [EC:4.2.1.92] | (RefSeq) allene oxide synthase 3-like	alpha-Linolenic acid metabolism (ko00592)	--	--	Cytochrome P450	Allene oxide synthase 3 OS=Solanum lycopersicum OX=4081 GN=AOS3 PE=1 SV=1	Q	Secondary metabolites biosynthesis, transport and catabolism	allene oxide synthase 3-like, partial [Quercus suber]	molecular function: catalytic activity (GO:0003824);; biological process: metabolic process (GO:0008152);; biological process: single-organism process (GO:0044699);; molecular function: binding (GO:0005488)
EVM0001133	EVM0001133	51.9436	83.5787	113.988	3.81079e-18	1.97892	up	2.07289e-11	1.15832	up	0.44097	0.777526	normal	[T]	Signal transduction mechanisms	Molecular Function: protein serine/threonine kinase activity (GO:0004674);; Molecular Function: ATP binding (GO:0005524);; Cellular Component: nucleus (GO:0005634);; Cellular Component: cytosol (GO:0005829);; Cellular Component: plasma membrane (GO:0005886);; Biological Process: protein phosphorylation (GO:0006468);; Biological Process: response to nutrient (GO:0007584);; Biological Process: resp…	--	--	[T]	Signal transduction mechanisms	Protein kinase domain;; Protein tyrosine kinase;; NAF domain;; Kinase-like	CBL-interacting serine/threonine-protein kinase 23 OS=Arabidopsis thaliana OX=3702 GN=CIPK23 PE=1 SV=1	T	Signal transduction mechanisms	cbl-interacting serine/threonine-protein kinase 23 [Quercus suber]	molecular function: catalytic activity (GO:0003824);; biological process: metabolic process (GO:0008152);; biological process: cellular process (GO:0009987);; molecular function: binding (GO:0005488);; cellular component: cell (GO:0005623);; cellular component: organelle (GO:0043226);; cellular component: cell part (GO:0044464);; cellular component: membrane (GO:0016020);; biological process: res…
EVM0031532	EVM0031532	8.53754	10.9685	14.7978	0.000594964	1.52161	up	0.0408474	0.830302	normal	0.763749	0.640757	normal	[G]	Carbohydrate transport and metabolism	Biological Process: starch catabolic process (GO:0005983);; Cellular Component: chloroplast (GO:0009507);; Molecular Function: beta-amylase activity (GO:0016161);;	K01177|0|vvi:100254897|K01177 beta-amylase [EC:3.2.1.2] | (RefSeq) inactive beta-amylase 4, chloroplastic	Starch and sucrose metabolism (ko00500)	--	--	Glycosyl hydrolase family 14	Inactive beta-amylase 4, chloroplastic OS=Arabidopsis thaliana OX=3702 GN=BAM4 PE=2 SV=1	O	Posttranslational modification, protein turnover, chaperones	inactive beta-amylase 4, chloroplastic isoform X1 [Quercus suber]	biological process: metabolic process (GO:0008152);; biological process: cellular process (GO:0009987);; cellular component: cell (GO:0005623);; cellular component: organelle (GO:0043226);; cellular component: cell part (GO:0044464);; molecular function: catalytic activity (GO:0003824)
EVM0020726	EVM0020726	125.332	299.233	269.904	2.93318e-20	1.91679	up	3.08305e-15	1.71512	up	0.965715	0.213867	normal	[E]	Amino acid transport and metabolism	Molecular Function: cystathionine gamma-synthase activity (GO:0003962);; Molecular Function: lyase activity (GO:0016829);; Molecular Function: pyridoxal phosphate binding (GO:0030170);;	K01761|0|tcc:TCM_015649|K01761 methionine-gamma-lyase [EC:4.4.1.11] | (RefSeq) Methionine gamma-lyase	Cysteine and methionine metabolism (ko00270);; Selenocompound metabolism (ko00450)	[E]	Amino acid transport and metabolism	Cys/Met metabolism PLP-dependent enzyme;; Aminotransferase class I and II;; Aminotransferase class-V	Methionine gamma-lyase OS=Arabidopsis thaliana OX=3702 GN=MGL PE=1 SV=1	E	Amino acid transport and metabolism	methionine gamma-lyase [Quercus suber]	molecular function: catalytic activity (GO:0003824);; molecular function: binding (GO:0005488)
EVM0012054	EVM0012054	0.308113	0.65966	0.20042	--	--	--	0.100028	1.45419	normal	0.891244	-0.682545	normal	[T]	Signal transduction mechanisms	--	--	--	--	--	Protein tyrosine kinase;; Protein kinase domain;; D-mannose binding lectin;; S-locus glycoprotein domain;; PAN-like domain	G-type lectin S-receptor-like serine/threonine-protein kinase RKS1 OS=Arabidopsis thaliana OX=3702 GN=RKS1 PE=3 SV=3	T	Signal transduction mechanisms	G-type lectin S-receptor-like serine/threonine-protein kinase RKS1 [Quercus suber]	--
EVM0029222	EVM0029222	58.2855	166.438	13.6878	1.30869e-05	-1.23188	down	1.88105e-16	1.98006	up	4.17422e-09	-2.90519	down	[M]	Cell wall/membrane/envelope biogenesis	Biological Process: negative regulation of flavonoid biosynthetic process (GO:0009964);; Molecular Function: anthocyanidin reductase activity (GO:0033729);; Molecular Function: coenzyme binding (GO:0050662);; Biological Process: oxidation-reduction process (GO:0055114);;	K21102|0|vvi:100232981|K21102 anthocyanidin reductase [(2S)-flavan-3-ol-forming] [EC:1.3.1.112] | (RefSeq) ANR, VvANR, ban; anthocyanidin reductase	Flavonoid biosynthesis (ko00941)	[V]	Defense mechanisms	NAD dependent epimerase/dehydratase family;; 3-beta hydroxysteroid dehydrogenase/isomerase family;; Male sterility protein;; NAD(P)H-binding;; GDP-mannose 4,6 dehydratase;; NmrA-like family	Anthocyanidin reductase ((2S)-flavan-3-ol-forming) OS=Vitis vinifera OX=29760 GN=ANR PE=3 SV=1	M	Cell wall/membrane/envelope biogenesis	anthocyanidin reductase ((2S)-flavan-3-ol-forming) [Quercus suber]	biological process: biological regulation (GO:0065007);; molecular function: catalytic activity (GO:0003824);; biological process: metabolic process (GO:0008152);; biological process: single-organism process (GO:0044699);; molecular function: binding (GO:0005488)
EVM0027829	EVM0027829	3.14454	0.338706	0.046393	5.62825e-17	-5.12834	down	3.68973e-08	-2.66574	down	--	--	--	--	--	Molecular Function: chromatin binding (GO:0003682);; Molecular Function: ATP binding (GO:0005524);; Molecular Function: zinc ion binding (GO:0008270);;	K02603|0|pop:POPTR_0009s05910g|K02603 origin recognition complex subunit 1 | (RefSeq) POPTRDRAFT_1087966; origin recognition complex 1 family protein	--	[L]	Replication, recombination and repair	ATPase family associated with various cellular activities (AAA);; PHD-finger;; AAA domain;; BAH domain	Origin of replication complex subunit 1A OS=Arabidopsis thaliana OX=3702 GN=ORC1A PE=1 SV=1	L	Replication, recombination and repair	origin of replication complex subunit 1B-like [Quercus suber]	molecular function: binding (GO:0005488)
EVM0007217	EVM0007217	3.14526	0.260648	0.018258	3.0019e-11	-6.21801	down	1.38671e-08	-2.97133	down	--	--	--	--	--	Molecular Function: DNA binding (GO:0003677);; Cellular Component: nucleus (GO:0005634);; Biological Process: regulation of transcription, DNA-templated (GO:0006355);;	--	--	--	--	B3 DNA binding domain	B3 domain-containing protein Os05g0481400 OS=Oryza sativa subsp. japonica OX=39947 GN=Os05g0481400 PE=2 SV=1	K	Transcription	putative B3 domain-containing protein At5g58280 [Quercus suber]	molecular function: binding (GO:0005488);; cellular component: cell (GO:0005623);; cellular component: organelle (GO:0043226);; cellular component: cell part (GO:0044464);; biological process: biological regulation (GO:0065007)
EVM0030924	EVM0030924	36.8957	6.53034	3.81261	7.5133e-26	-2.49107	down	6.48976e-29	-2.01749	down	0.945011	-0.364778	normal	--	--	--	--	--	--	--	tify domain;; Divergent CCT motif	Protein TIFY 4B OS=Arabidopsis thaliana OX=3702 GN=TIFY4B PE=1 SV=1	S	Function unknown	protein TIFY 4B-like isoform X1 [Quercus suber]	--
EVM0000670	EVM0000670	4.21367	0.601345	0.451736	4.92467e-20	-2.37961	down	1.68406e-12	-2.29268	down	0.999108	-0.0181806	normal	[G]	Carbohydrate transport and metabolism	Molecular Function: beta-galactosidase activity (GO:0004565);; Cellular Component: cell wall (GO:0005618);; Cellular Component: vacuole (GO:0005773);; Biological Process: carbohydrate metabolic process (GO:0005975);; Molecular Function: carbohydrate binding (GO:0030246);;	--	--	[G]	Carbohydrate transport and metabolism	Glycosyl hydrolases family 35;; Galactose binding lectin domain;; Beta-galactosidase	Beta-galactosidase 8 OS=Arabidopsis thaliana OX=3702 GN=BGAL8 PE=2 SV=2	G	Carbohydrate transport and metabolism	beta-galactosidase 8-like [Prunus avium]	molecular function: catalytic activity (GO:0003824);; cellular component: cell (GO:0005623);; cellular component: cell part (GO:0044464);; cellular component: organelle (GO:0043226);; biological process: metabolic process (GO:0008152);; molecular function: binding (GO:0005488)
Castanea_mollissima_newGene_2458	--	1.79999	0.626447	0.312631	0.00118155	-1.56775	down	0.0307743	-1.35681	normal	--	--	--	--	--	--	--	--	--	--	--	--	--	--	uncharacterized protein LOC112006613 [Quercus suber]	--
EVM0018639	EVM0018639	1.10466	1.71122	1.59947	0.00152304	1.30939	up	0.108732	1.05936	normal	0.991644	0.172767	normal	[K]	Transcription	--	--	--	[R]	General function prediction only	Leucine rich repeat;; Leucine Rich repeats (2 copies);; Leucine Rich Repeat;; Leucine Rich repeat	Receptor-like protein EIX2 OS=Solanum lycopersicum OX=4081 GN=EIX2 PE=1 SV=2	S	Function unknown	receptor-like protein EIX2 [Quercus suber]	--
EVM0012746	EVM0012746	97.7704	29.1937	15.2505	1.68025e-14	-1.91017	down	6.06653e-19	-1.26698	down	0.823158	-0.532483	normal	[K]	Transcription	Molecular Function: RNA polymerase II activity (GO:0001055);; Molecular Function: DNA binding (GO:0003677);; Cellular Component: DNA-directed RNA polymerase II, core complex (GO:0005665);; Biological Process: transcription from RNA polymerase II promoter (GO:0006366);; Molecular Function: protein dimerization activity (GO:0046983);;	K03011|0|pop:POPTR_0009s10050g|K03011 DNA-directed RNA polymerase II subunit RPB3 | (RefSeq) POPTRDRAFT_1087179; DNA-directed RNA polymerase II 36 kDa polypeptide B family protein	Purine metabolism (ko00230);; Pyrimidine metabolism (ko00240);; RNA polymerase (ko03020)	[K]	Transcription	RNA polymerase Rpb3/RpoA insert domain;; RNA polymerase Rpb3/Rpb11 dimerisation domain	DNA-directed RNA polymerases II, IV and V subunit 3 OS=Arabidopsis thaliana OX=3702 GN=NRPB3 PE=1 SV=1	K	Transcription	RNA polymerase II [Quercus suber]	molecular function: catalytic activity (GO:0003824);; biological process: metabolic process (GO:0008152);; biological process: cellular process (GO:0009987);; molecular function: binding (GO:0005488);; cellular component: cell (GO:0005623);; cellular component: membrane-enclosed lumen (GO:0031974);; cellular component: macromolecular complex (GO:0032991);; cellular component: organelle (GO:004322…
EVM0026788	EVM0026788	16.3245	26.2919	24.713	2.56542e-13	1.42051	up	1.58148e-06	1.15615	up	0.957921	0.265001	normal	--	--	--	--	--	--	--	Phloem protein 2	Protein PHLOEM PROTEIN 2-LIKE A1 OS=Arabidopsis thaliana OX=3702 GN=PP2A1 PE=2 SV=1	S	Function unknown	uncharacterized protein PHLOEM PROTEIN 2-LIKE A4-like [Quercus suber]	--
EVM0029465	EVM0029465	5.39497	2.14405	1.25002	1.22922e-08	-1.3102	down	0.000961606	-0.84753	down	0.95478	-0.348486	normal	[K]	Transcription	--	--	--	--	--	TIR domain;; NB-ARC domain;; TIR domain;; Leucine rich repeat;; Leucine Rich repeats (2 copies)	TMV resistance protein N OS=Nicotiana glutinosa OX=35889 GN=N PE=1 SV=1	S	Function unknown	TMV resistance protein N-like [Quercus suber]	--
EVM0008590	EVM0008590	7.51585	37.398	55.1906	1.27118e-32	3.73182	up	7.9526e-41	2.77525	up	0.404453	0.882392	normal	[C]	Energy production and conversion	Molecular Function: fatty-acyl-CoA binding (GO:0000062);; Molecular Function: acyl-CoA dehydrogenase activity (GO:0003995);; Molecular Function: copper ion binding (GO:0005507);; Cellular Component: mitochondrion (GO:0005739);; Molecular Function: electron carrier activity (GO:0009055);; Biological Process: fatty acid beta-oxidation using acyl-CoA dehydrogenase (GO:0033539);; Molecular Function: …	K03522|0|jcu:105632900|K03522 electron transfer flavoprotein alpha subunit | (RefSeq) electron transfer flavoprotein subunit alpha, mitochondrial-like	--	[C]	Energy production and conversion	Electron transfer flavoprotein domain;; Electron transfer flavoprotein FAD-binding domain	Electron transfer flavoprotein subunit alpha, mitochondrial OS=Arabidopsis thaliana OX=3702 GN=ETFA PE=1 SV=1	C	Energy production and conversion	electron transfer flavoprotein subunit alpha, mitochondrial isoform X2 [Quercus suber]	molecular function: binding (GO:0005488);; molecular function: catalytic activity (GO:0003824);; biological process: metabolic process (GO:0008152);; biological process: single-organism process (GO:0044699);; cellular component: cell (GO:0005623);; cellular component: organelle (GO:0043226);; cellular component: cell part (GO:0044464);; molecular function: electron carrier activity (GO:0009055);;…
Castanea_mollissima_newGene_6751	--	4.46303	0	0	1.00293e-07	-8.22739	down	5.78781e-09	-6.90893	down	--	--	--	--	--	Molecular Function: UDP-glucosyltransferase activity (GO:0035251);; Biological Process: (-)-secologanin biosynthetic process (GO:1900994);;	--	--	[GC]	Carbohydrate transport and metabolism;; Energy production and conversion	--	7-deoxyloganetic acid glucosyltransferase OS=Catharanthus roseus OX=4058 GN=UGT709C2 PE=1 SV=1	S	Function unknown	7-deoxyloganetic acid glucosyltransferase-like [Quercus suber]	molecular function: catalytic activity (GO:0003824);; biological process: metabolic process (GO:0008152);; biological process: cellular process (GO:0009987);; biological process: single-organism process (GO:0044699)
EVM0001109	EVM0001109	15.0688	7.49944	2.97183	9.10057e-09	-1.5478	down	0.0630973	-0.525116	normal	0.730566	-0.789902	normal	[Q]	Secondary metabolites biosynthesis, transport and catabolism	Molecular Function: carboxymethylenebutenolidase activity (GO:0008806);;	K01061|7.7317e-135|rcu:8261481|K01061 carboxymethylenebutenolidase [EC:3.1.1.45] | (RefSeq) endo-1,3;1,4-beta-D-glucanase	--	[R]	General function prediction only	Dienelactone hydrolase family	Endo-1,3;1,4-beta-D-glucanase OS=Zea mays OX=4577 PE=1 SV=1	Q	Secondary metabolites biosynthesis, transport and catabolism	endo-1,3;1,4-beta-D-glucanase-like [Quercus suber]	molecular function: catalytic activity (GO:0003824)
EVM0004675	EVM0004675	14.4136	3.87995	1.87923	2.71948e-05	-1.99297	down	4.56327e-06	-1.40119	down	0.935672	-0.447689	normal	[Q]	Secondary metabolites biosynthesis, transport and catabolism	Biological Process: fatty acid biosynthetic process (GO:0006633);; Cellular Component: integral component of membrane (GO:0016021);; Molecular Function: transferase activity, transferring acyl groups other than amino-acyl groups (GO:0016747);;	K15397|0|tcc:TCM_020755|K15397 3-ketoacyl-CoA synthase [EC:2.3.1.199] | (RefSeq) 3-ketoacyl-CoA synthase	Fatty acid elongation (ko00062)	--	--	FAE1/Type III polyketide synthase-like protein;; 3-Oxoacyl-[acyl-carrier-protein (ACP)] synthase III C terminal;; Chalcone and stilbene synthases, C-terminal domain	3-ketoacyl-CoA synthase 11 OS=Arabidopsis thaliana OX=3702 GN=KCS11 PE=1 SV=1	I	Lipid transport and metabolism	3-ketoacyl-CoA synthase 11-like [Quercus suber]	biological process: metabolic process (GO:0008152);; biological process: cellular process (GO:0009987);; biological process: single-organism process (GO:0044699);; cellular component: membrane (GO:0016020);; cellular component: membrane part (GO:0044425);; molecular function: catalytic activity (GO:0003824)
EVM0006834	EVM0006834	2.40029	0.077351	0	9.32706e-07	-7.73738	down	3.77064e-08	-4.05508	down	--	--	--	--	--	--	--	--	--	--	--	--	S	Function unknown	hypothetical protein CFP56_23228 [Quercus suber]	--
EVM0026406	EVM0026406	0.0973563	0.646121	2.78253	0.0274327	4.24962	normal	--	--	--	0.302085	1.51315	normal	--	--	Cellular Component: membrane (GO:0016020);;	--	--	--	--	Domain of unknown function (DUF588)	CASP-like protein 4D1 OS=Ricinus communis OX=3988 GN=RCOM_1206790 PE=3 SV=1	S	Function unknown	CASP-like protein 4D1 [Quercus suber]	cellular component: membrane (GO:0016020)
EVM0008658	EVM0008658	0.778827	1.46694	0.796091	0.0370238	0.791565	normal	0.00352138	1.3508	up	0.95478	-0.40159	normal	--		Molecular Function: nucleotide binding (GO:0000166);; Molecular Function: protein kinase activity (GO:0004672);; Cellular Component: membrane (GO:0016020);; Biological Process: phosphorylation (GO:0016310);;	--	--	--	--	Protein tyrosine kinase;; Protein kinase domain;; Leucine Rich repeats (2 copies);; Leucine rich repeat;; Leucine rich repeat N-terminal domain;; Leucine Rich Repeat	Receptor-like kinase TMK4 OS=Arabidopsis thaliana OX=3702 GN=TMK4 PE=1 SV=1	T	Signal transduction mechanisms	receptor-like kinase TMK4 [Quercus suber]	molecular function: binding (GO:0005488);; molecular function: catalytic activity (GO:0003824);; biological process: metabolic process (GO:0008152);; biological process: cellular process (GO:0009987);; cellular component: membrane (GO:0016020)
EVM0020582	EVM0020582	11.0572	15.5914	2.918	0.212461	-0.918963	normal	0.093599	0.954998	normal	0.224067	-1.46509	normal	[Q]	Secondary metabolites biosynthesis, transport and catabolism	--	--	--	[QR]	Secondary metabolites biosynthesis, transport and catabolism;; General function prediction only	non-haem dioxygenase in morphine synthesis N-terminal;; 2OG-Fe(II) oxygenase superfamily	Protein DMR6-LIKE OXYGENASE 2 OS=Arabidopsis thaliana OX=3702 GN=DLO2 PE=2 SV=1	S	Function unknown	protein DMR6-LIKE OXYGENASE 2-like [Quercus suber]	--
EVM0028711	EVM0028711	1.27697	40.9994	138.934	7.85727e-211	7.54645	up	2.42037e-77	5.40697	up	0.000162774	1.96266	up	--	--	Molecular Function: hydrolase activity, hydrolyzing O-glycosyl compounds (GO:0004553);; Biological Process: carbohydrate metabolic process (GO:0005975);; Molecular Function: polysaccharide binding (GO:0030247);; Cellular Component: anchored component of plasma membrane (GO:0046658);;	--	--	--	--	Glycosyl hydrolases family 17	Glucan endo-1,3-beta-glucosidase OS=Vitis vinifera OX=29760 GN=VIT_06s0061g00120 PE=1 SV=2	G	Carbohydrate transport and metabolism	glucan endo-1,3-beta-glucosidase-like [Quercus suber]	molecular function: catalytic activity (GO:0003824);; biological process: metabolic process (GO:0008152);; molecular function: binding (GO:0005488);; cellular component: cell (GO:0005623);; cellular component: membrane (GO:0016020);; cellular component: membrane part (GO:0044425);; cellular component: cell part (GO:0044464)
EVM0002593	EVM0002593	14.206	1.68484	0.156324	3.21374e-23	-5.64668	down	2.92294e-18	-2.57279	down	0.227075	-1.70296	normal	--	--	Cellular Component: integral component of membrane (GO:0016021);; Biological Process: transmembrane transport (GO:0055085);;	--	--	[S]	Function unknown	Membrane transport protein	Protein PIN-LIKES 1 OS=Arabidopsis thaliana OX=3702 GN=PILS1 PE=2 SV=1	S	Function unknown	protein PIN-LIKES 3-like isoform X1 [Quercus suber]	cellular component: membrane (GO:0016020);; cellular component: membrane part (GO:0044425);; biological process: localization (GO:0051179)
EVM0020818	EVM0020818	9.32795	1.04627	0.0145175	9.55598e-09	-6.5388	down	4.03418e-06	-2.52935	down	--	--	--	--	--	--	K10523|6.29463e-41|aly:ARALYDRAFT_921072|K10523 speckle-type POZ protein | (RefSeq) hypothetical protein	--	[DR]	Cell cycle control, cell division, chromosome partitioning;; General function prediction only	--	BTB/POZ and MATH domain-containing protein 2 OS=Arabidopsis thaliana OX=3702 GN=BPM2 PE=1 SV=1	S	Function unknown	BTB/POZ and MATH domain-containing protein 4-like [Quercus suber]	--
EVM0022576	EVM0022576	30.5184	45.1639	36.8802	1.17257e-06	1.08667	up	0.000138648	1.02482	up	0.993851	0.0826987	normal	[C]	Energy production and conversion	Biological Process: ATP synthesis coupled proton transport (GO:0015986);; Cellular Component: proton-transporting ATP synthase complex, catalytic core F(1) (GO:0045261);; Molecular Function: proton-transporting ATP synthase activity, rotational mechanism (GO:0046933);; Molecular Function: proton-transporting ATPase activity, rotational mechanism (GO:0046961);;	K02134|8.21169e-93|gra:105765046|K02134 F-type H+-transporting ATPase subunit delta | (RefSeq) ATP synthase subunit delta', mitochondrial-like	Oxidative phosphorylation (ko00190)	[C]	Energy production and conversion	ATP synthase, Delta/Epsilon chain, beta-sandwich domain	ATP synthase subunit delta&apos;, mitochondrial OS=Arabidopsis thaliana OX=3702 GN=At5g47030 PE=1 SV=1	C	Energy production and conversion	PREDICTED: ATP synthase subunit delta&apos;, mitochondrial-like [Juglans regia]	biological process: metabolic process (GO:0008152);; biological process: cellular process (GO:0009987);; biological process: single-organism process (GO:0044699);; biological process: localization (GO:0051179);; cellular component: cell (GO:0005623);; cellular component: membrane (GO:0016020);; cellular component: macromolecular complex (GO:0032991);; cellular component: membrane part (GO:0044425…
EVM0024108	EVM0024108	21.5559	7.62584	3.11011	7.86083e-14	-1.98672	down	0.000591163	-1.01703	down	0.730566	-0.76157	normal	--	--	--	K17262|2.36046e-148|jcu:105645097|K17262 tubulin-folding cofactor B | (RefSeq) tubulin-folding cofactor B-like	--	[O]	Posttranslational modification, protein turnover, chaperones	Ubiquitin-like domain;; CAP-Gly domain	Tubulin-folding cofactor B OS=Arabidopsis thaliana OX=3702 GN=TFCB PE=1 SV=1	O	Posttranslational modification, protein turnover, chaperones	tubulin-folding cofactor B [Quercus suber]	--
EVM0005256	EVM0005256	1.32599	34.7379	63.5857	1.42544e-22	6.35136	up	1.54494e-05	4.57806	up	0.22057	1.15415	normal	[T]	Signal transduction mechanisms	--	K04733|0|tcc:TCM_034261|K04733 interleukin-1 receptor-associated kinase 4 [EC:2.7.11.1] | (RefSeq) Kinase protein with adenine nucleotide alpha hydrolases-like domain, putative	--	[T]	Signal transduction mechanisms	Protein kinase domain;; Protein tyrosine kinase	Proline-rich receptor-like protein kinase PERK8 OS=Arabidopsis thaliana OX=3702 GN=PERK8 PE=1 SV=1	T	Signal transduction mechanisms	phytosulfokine receptor 1-like [Quercus suber]	--
EVM0027080	EVM0027080	8.99481	34.5472	40.5204	8.60653e-24	3.02838	up	6.06853e-31	2.40504	up	0.74902	0.585939	normal	[R]	General function prediction only	Biological Process: metabolic process (GO:0008152);; Cellular Component: integral component of membrane (GO:0016021);; Molecular Function: hippurate hydrolase activity (GO:0047980);;	K14664|0|gra:105772726|K14664 IAA-amino acid hydrolase [EC:3.5.1.-] | (RefSeq) IAA-amino acid hydrolase ILR1-like 6	--	--	--	Peptidase family M20/M25/M40;; Peptidase dimerisation domain	IAA-amino acid hydrolase ILR1-like 6 OS=Arabidopsis thaliana OX=3702 GN=ILL6 PE=1 SV=2	E	Amino acid transport and metabolism	IAA-amino acid hydrolase ILR1-like 6 [Quercus suber]	biological process: metabolic process (GO:0008152);; cellular component: membrane (GO:0016020);; cellular component: membrane part (GO:0044425);; molecular function: catalytic activity (GO:0003824)
EVM0033351	EVM0033351	8.77672	2.4968	1.7573	2.02923e-05	-1.54134	down	0.000228837	-1.31694	down	0.993848	-0.125393	normal	--	--	Cellular Component: chloroplast thylakoid membrane (GO:0009535);; Cellular Component: integral component of membrane (GO:0016021);;	--	--	--	--	Protein of unknown function (DUF3082)	--	S	Function unknown	uncharacterized protein LOC112013416 [Quercus suber]	cellular component: cell (GO:0005623);; cellular component: membrane (GO:0016020);; cellular component: organelle (GO:0043226);; cellular component: organelle part (GO:0044422);; cellular component: cell part (GO:0044464);; cellular component: membrane part (GO:0044425)
EVM0019667	EVM0019667	13.5902	48.6135	44.3959	2.70699e-30	2.47627	up	3.97721e-41	2.30418	up	0.976128	0.192888	normal	[S]	Function unknown	Cellular Component: integral component of membrane (GO:0016021);; Biological Process: transmembrane transport (GO:0055085);;	--	--	--	--	OPT oligopeptide transporter protein	Probable metal-nicotianamine transporter YSL7 OS=Arabidopsis thaliana OX=3702 GN=YSL7 PE=2 SV=1	S	Function unknown	probable metal-nicotianamine transporter YSL7 isoform X1 [Quercus suber]	cellular component: membrane (GO:0016020);; cellular component: membrane part (GO:0044425);; biological process: localization (GO:0051179)
Castanea_mollissima_newGene_919	--	2.93003	1.34901	0.558415	8.21541e-06	-1.7873	down	0.0442413	-0.773848	normal	0.897915	-0.639422	normal	--	--	--	--	--	--	--	Leucine Rich repeats (2 copies)	Protein SUPPRESSOR OF npr1-1, CONSTITUTIVE 1 OS=Arabidopsis thaliana OX=3702 GN=SNC1 PE=1 SV=5	L	Replication, recombination and repair	uncharacterized protein LOC112017855 [Quercus suber]	--
Castanea_mollissima_newGene_5475	--	0.692306	0.084749	0.094191	1.65403e-06	-2.01129	down	1.10173e-05	-2.43437	down	--	--	--	--	--	Molecular Function: DNA binding (GO:0003677);; Molecular Function: RNA binding (GO:0003723);; Molecular Function: RNA-directed DNA polymerase activity (GO:0003964);; Biological Process: RNA-dependent DNA biosynthetic process (GO:0006278);; Biological Process: DNA recombination (GO:0006310);;	--	--	[R]	General function prediction only	Reverse transcriptase (RNA-dependent DNA polymerase);; Reverse transcriptase (RNA-dependent DNA polymerase);; Retrotransposon gag protein	RNA-directed DNA polymerase homolog OS=Oenothera berteroana OX=3950 PE=4 SV=1	L	Replication, recombination and repair	PREDICTED: uncharacterized protein LOC108983648 [Juglans regia]	molecular function: binding (GO:0005488);; molecular function: catalytic activity (GO:0003824);; biological process: metabolic process (GO:0008152);; biological process: cellular process (GO:0009987)
EVM0003788	EVM0003788	5.74232	7.15242	9.57006	4.90353e-09	1.58202	up	0.00312218	0.781744	up	0.597785	0.736395	normal	[HT]	Coenzyme transport and metabolism;; Signal transduction mechanisms	Cellular Component: integral component of membrane (GO:0016021);; Molecular Function: kinase activity (GO:0016301);; Biological Process: phosphorylation (GO:0016310);;	K08869|0|jcu:105649445|K08869 aarF domain-containing kinase | (RefSeq) probable serine/threonine-protein kinase abkC	--	[R]	General function prediction only	ABC1 family	Protein ACTIVITY OF BC1 COMPLEX KINASE 7, chloroplastic OS=Arabidopsis thaliana OX=3702 GN=ABC1K7 PE=1 SV=1	S	Function unknown	probable serine/threonine-protein kinase abkC [Quercus suber]	cellular component: membrane (GO:0016020);; cellular component: membrane part (GO:0044425);; molecular function: catalytic activity (GO:0003824);; biological process: metabolic process (GO:0008152);; biological process: cellular process (GO:0009987)
EVM0029995	EVM0029995	21.1099	62.2886	104.939	5.41439e-23	3.17496	up	7.67376e-29	2.02616	up	0.226354	1.05706	normal	[EH]	Amino acid transport and metabolism;; Coenzyme transport and metabolism	Cellular Component: cell (GO:0005623);; Biological Process: sulfate reduction (GO:0019419);; Molecular Function: adenylyl-sulfate reductase (glutathione) activity (GO:0033741);; Biological Process: cell redox homeostasis (GO:0045454);;	K05907|0|pmum:103324412|K05907 adenylyl-sulfate reductase (glutathione) [EC:1.8.4.9] | (RefSeq) 5'-adenylylsulfate reductase 3, chloroplastic-like	Sulfur metabolism (ko00920)	[E]	Amino acid transport and metabolism	Phosphoadenosine phosphosulfate reductase family;; Thioredoxin	5&apos;-adenylylsulfate reductase 3, chloroplastic OS=Arabidopsis thaliana OX=3702 GN=APR3 PE=2 SV=2	P	Inorganic ion transport and metabolism	5&apos;-adenylylsulfate reductase 3, chloroplastic-like [Quercus suber]	cellular component: cell (GO:0005623);; biological process: metabolic process (GO:0008152);; biological process: cellular process (GO:0009987);; biological process: single-organism process (GO:0044699);; molecular function: catalytic activity (GO:0003824);; biological process: biological regulation (GO:0065007)
EVM0002398	EVM0002398	12.364	0.942836	0.059415	1.83967e-32	-6.61697	down	2.28727e-27	-3.19615	down	0.396143	-1.39494	normal	--	--	Molecular Function: zinc ion binding (GO:0008270);; Cellular Component: integral component of membrane (GO:0016021);;	--	--	[A]	RNA processing and modification	RING-variant domain	--	O	Posttranslational modification, protein turnover, chaperones	uncharacterized protein LOC112012124 [Quercus suber]	molecular function: binding (GO:0005488);; cellular component: membrane (GO:0016020);; cellular component: membrane part (GO:0044425)
EVM0028594	EVM0028594	0.140927	0.388226	4.66475	1.08116e-10	5.71286	up	--	--	--	0.00966179	2.51875	up	[E]	Amino acid transport and metabolism	Molecular Function: 1-aminocyclopropane-1-carboxylate synthase activity (GO:0016847);; Molecular Function: pyridoxal phosphate binding (GO:0030170);; Biological Process: 1-aminocyclopropane-1-carboxylate biosynthetic process (GO:0042218);;	K20772|0|mdm:103439201|K20772 1-aminocyclopropane-1-carboxylate synthase 1/2/6 [EC:4.4.1.14] | (RefSeq) MdACS-5B; 1-aminocyclopropane-1-carboxylate synthase	Cysteine and methionine metabolism (ko00270)	[T]	Signal transduction mechanisms	Aminotransferase class I and II	1-aminocyclopropane-1-carboxylate synthase OS=Glycine max OX=3847 GN=ACS1 PE=2 SV=1	E	Amino acid transport and metabolism	1-aminocyclopropane-1-carboxylate synthase-like [Quercus suber]	molecular function: catalytic activity (GO:0003824);; molecular function: binding (GO:0005488);; biological process: metabolic process (GO:0008152);; biological process: cellular process (GO:0009987);; biological process: single-organism process (GO:0044699)
EVM0028037	EVM0028037	11.6706	0.952225	0.362148	4.60325e-46	-4.15035	down	2.08464e-26	-3.10395	down	0.919394	-0.585592	normal	--		Molecular Function: protein serine/threonine kinase activity (GO:0004674);; Molecular Function: ATP binding (GO:0005524);; Biological Process: protein phosphorylation (GO:0006468);; Cellular Component: integral component of membrane (GO:0016021);;	K04733|0|pmum:103344671|K04733 interleukin-1 receptor-associated kinase 4 [EC:2.7.11.1] | (RefSeq) serine/threonine-protein kinase CDL1	--	[T]	Signal transduction mechanisms	Protein tyrosine kinase;; Protein kinase domain	Probable serine/threonine-protein kinase PBL7 OS=Arabidopsis thaliana OX=3702 GN=PBL7 PE=1 SV=1	T	Signal transduction mechanisms	probable serine/threonine-protein kinase PBL7 [Quercus suber]	molecular function: catalytic activity (GO:0003824);; biological process: metabolic process (GO:0008152);; biological process: cellular process (GO:0009987);; molecular function: binding (GO:0005488);; cellular component: membrane (GO:0016020);; cellular component: membrane part (GO:0044425)
EVM0010098	EVM0010098	11.0084	0.321966	0.302381	2.70641e-30	-4.25632	down	8.15729e-45	-4.53654	down	0.991644	0.181992	normal	[K]	Transcription	Molecular Function: protein kinase activity (GO:0004672);; Molecular Function: ATP binding (GO:0005524);; Cellular Component: plasma membrane (GO:0005886);; Biological Process: protein phosphorylation (GO:0006468);; Cellular Component: integral component of membrane (GO:0016021);;	--	--	--	--	Protein kinase domain;; Protein tyrosine kinase;; Leucine rich repeat;; Leucine rich repeat N-terminal domain;; Leucine Rich repeats (2 copies);; Protein tyrosine kinase;; Protein kinase domain	Probable inactive receptor kinase At4g23740 OS=Arabidopsis thaliana OX=3702 GN=At4g23740 PE=2 SV=1	S	Function unknown	probable inactive receptor kinase At4g23740 [Quercus suber]	molecular function: catalytic activity (GO:0003824);; biological process: metabolic process (GO:0008152);; biological process: cellular process (GO:0009987);; molecular function: binding (GO:0005488);; cellular component: cell (GO:0005623);; cellular component: membrane (GO:0016020);; cellular component: cell part (GO:0044464);; cellular component: membrane part (GO:0044425)
EVM0002961	EVM0002961	14.7227	5.19735	1.67628	8.59157e-15	-2.36418	down	4.03857e-05	-1.02589	down	0.446754	-1.06268	normal	--	--	Cellular Component: membrane (GO:0016020);;	K14315|0|pper:PRUPE_ppa003866mg|K14315 nucleoporin NDC1 | (RefSeq) hypothetical protein	RNA transport (ko03013)	--	--	Nucleoporin protein Ndc1-Nup	--	S	Function unknown	uncharacterized protein LOC112032599 [Quercus suber]	cellular component: membrane (GO:0016020)
EVM0017023	EVM0017023	1.81031	2.75252	2.31965	2.72729e-08	1.15634	up	0.0007475	1.06722	up	0.993778	0.100376	normal	--	--	--	--	--	[S]	Function unknown	Chromosome segregation during meiosis;; Domain of unknown function (DUF4210)	--	S	Function unknown	uncharacterized protein LOC112019729 [Quercus suber]	--
EVM0014063	EVM0014063	9.22072	0.966354	0.06856	6.16206e-12	-5.85128	down	7.35795e-07	-2.68174	down	--	--	--	--	--	Molecular Function: zinc ion binding (GO:0008270);; Cellular Component: integral component of membrane (GO:0016021);; Biological Process: protein ubiquitination (GO:0016567);; Biological Process: proteasome-mediated ubiquitin-dependent protein catabolic process (GO:0043161);; Molecular Function: ubiquitin protein ligase activity (GO:0061630);;	--	--	[O]	Posttranslational modification, protein turnover, chaperones	Ring finger domain;; RING-H2 zinc finger domain;; RING-like zinc finger;; RING-type zinc-finger;; Anaphase-promoting complex subunit 11 RING-H2 finger;; Zinc finger, C3HC4 type (RING finger)	Putative RING-H2 finger protein ATL69 OS=Arabidopsis thaliana OX=3702 GN=ATL69 PE=3 SV=1	O	Posttranslational modification, protein turnover, chaperones	putative ring-h2 finger protein atl69 [Quercus suber]	molecular function: binding (GO:0005488);; cellular component: membrane (GO:0016020);; cellular component: membrane part (GO:0044425);; biological process: metabolic process (GO:0008152);; biological process: cellular process (GO:0009987);; molecular function: catalytic activity (GO:0003824)
EVM0025889	EVM0025889	0.944858	0.07875	0	4.63934e-05	-6.76456	down	0.00110671	-2.71122	down	--	--	--	[DPM]	Cell cycle control, cell division, chromosome partitioning;; Inorganic ion transport and metabolism;; Cell wall/membrane/envelope biogenesis	Molecular Function: copper ion binding (GO:0005507);; Biological Process: lignin biosynthetic process (GO:0009809);; Molecular Function: oxidoreductase activity, oxidizing metal ions (GO:0016722);; Biological Process: lignin catabolic process (GO:0046274);; Cellular Component: apoplast (GO:0048046);; Molecular Function: hydroquinone:oxygen oxidoreductase activity (GO:0052716);; Biological Process…	K05909|0|vvi:100251850|K05909 laccase [EC:1.10.3.2] | (RefSeq) laccase-17	--	[Q]	Secondary metabolites biosynthesis, transport and catabolism	Multicopper oxidase;; Multicopper oxidase;; Multicopper oxidase	Laccase-17 OS=Arabidopsis thaliana OX=3702 GN=LAC17 PE=2 SV=1	Q	Secondary metabolites biosynthesis, transport and catabolism	laccase-17-like [Quercus suber]	molecular function: binding (GO:0005488);; biological process: metabolic process (GO:0008152);; biological process: cellular process (GO:0009987);; biological process: single-organism process (GO:0044699);; molecular function: catalytic activity (GO:0003824);; cellular component: extracellular region (GO:0005576)
Castanea_mollissima_newGene_2078	--	3.73064	0.409829	0.446468	8.40993e-06	-2.17596	down	8.84475e-05	-2.55888	down	--	--	--	--	--	Molecular Function: calcium ion binding (GO:0005509);; Cellular Component: mitochondrion (GO:0005739);; Cellular Component: integral component of membrane (GO:0016021);; Molecular Function: ribosome binding (GO:0043022);;	K17800|3.96867e-68|vvi:100257815|K17800 LETM1 and EF-hand domain-containing protein 1, mitochondrial | (RefSeq) LETM1 and EF-hand domain-containing protein 1, mitochondrial	--	--	--	EF-hand domain pair	--	S	Function unknown	mitochondrial proton/calcium exchanger protein-like isoform X1 [Quercus suber]	molecular function: binding (GO:0005488);; cellular component: cell (GO:0005623);; cellular component: organelle (GO:0043226);; cellular component: cell part (GO:0044464);; cellular component: membrane (GO:0016020);; cellular component: membrane part (GO:0044425)
EVM0000785	EVM0000785	66.5927	83.8227	90.1269	5.80226e-12	1.27272	up	6.98585e-09	0.801997	up	0.824924	0.460196	normal	[G]	Carbohydrate transport and metabolism	Molecular Function: magnesium ion binding (GO:0000287);; Biological Process: carbohydrate metabolic process (GO:0005975);; Molecular Function: intramolecular transferase activity, phosphotransferases (GO:0016868);;	K01835|0|cic:CICLE_v10014721mg|K01835 phosphoglucomutase [EC:5.4.2.2] | (RefSeq) hypothetical protein	Glycolysis / Gluconeogenesis (ko00010);; Pentose phosphate pathway (ko00030);; Galactose metabolism (ko00052);; Purine metabolism (ko00230);; Starch and sucrose metabolism (ko00500);; Amino sugar and nucleotide sugar metabolism (ko00520)	[G]	Carbohydrate transport and metabolism	Phosphoglucomutase/phosphomannomutase, alpha/beta/alpha domain I;; Phosphoglucomutase/phosphomannomutase, alpha/beta/alpha domain III;; Phosphoglucomutase/phosphomannomutase, alpha/beta/alpha domain II;; Phosphoglucomutase/phosphomannomutase, C-terminal domain	Phosphoglucomutase, cytoplasmic OS=Populus tremula OX=113636 GN=PGM1 PE=2 SV=1	G	Carbohydrate transport and metabolism	phosphoglucomutase, cytoplasmic [Quercus suber]	molecular function: binding (GO:0005488);; biological process: metabolic process (GO:0008152);; molecular function: catalytic activity (GO:0003824)
EVM0019417	EVM0019417	5.43031	7.87338	8.00255	9.43239e-05	1.32606	up	0.0197966	0.984186	normal	0.955789	0.318173	normal	--	--	Cellular Component: chloroplast (GO:0009507);; Biological Process: cytochrome b6f complex assembly (GO:0010190);; Cellular Component: integral component of membrane (GO:0016021);;	--	--	--	--	Cofactor assembly of complex C subunit B	Protein COFACTOR ASSEMBLY OF COMPLEX C SUBUNIT B CCB1, chloroplastic OS=Arabidopsis thaliana OX=3702 GN=CCB1 PE=1 SV=1	S	Function unknown	protein COFACTOR ASSEMBLY OF COMPLEX C SUBUNIT B CCB1, chloroplastic [Quercus suber]	cellular component: cell (GO:0005623);; cellular component: organelle (GO:0043226);; cellular component: cell part (GO:0044464);; biological process: cellular process (GO:0009987);; biological process: cellular component organization or biogenesis (GO:0071840);; cellular component: membrane (GO:0016020);; cellular component: membrane part (GO:0044425)
EVM0024070	EVM0024070	3.76412	46.9633	44.9207	1.23448e-25	4.27234	up	9.63755e-26	4.03111	up	0.970928	0.230776	normal	[L]	Replication, recombination and repair	--	--	--	--	--	SOUL heme-binding protein	--	S	Function unknown	heme-binding protein 2 [Quercus suber]	--
EVM0022591	EVM0022591	0.427767	4.35974	8.73164	1.77895e-26	5.12651	up	5.15788e-10	3.67159	up	0.130016	1.24377	normal	[T]	Signal transduction mechanisms	Cellular Component: membrane (GO:0016020);; Molecular Function: kinase activity (GO:0016301);; Biological Process: phosphorylation (GO:0016310);;	--	--	--	--	Protein tyrosine kinase;; Protein kinase domain;; D-mannose binding lectin;; S-locus glycoprotein domain;; PAN-like domain	G-type lectin S-receptor-like serine/threonine-protein kinase CES101 OS=Arabidopsis thaliana OX=3702 GN=CES101 PE=2 SV=2	T	Signal transduction mechanisms	G-type lectin S-receptor-like serine/threonine-protein kinase CES101 [Quercus suber]	cellular component: membrane (GO:0016020);; molecular function: catalytic activity (GO:0003824);; biological process: metabolic process (GO:0008152);; biological process: cellular process (GO:0009987)
EVM0002795	EVM0002795	53.3809	25.5489	12.0895	1.62418e-11	-1.36295	down	0.000215408	-0.590455	down	0.6535	-0.657854	normal	--	--	Biological Process: defense response (GO:0006952);; Biological Process: cytoskeleton organization (GO:0007010);; Molecular Function: microtubule binding (GO:0008017);; Biological Process: response to biotic stimulus (GO:0009607);;	--	--	--	--	Microtubule-associated protein 70;; Microtubule-associated protein 70	Microtubule-associated protein 70-2 OS=Arabidopsis thaliana OX=3702 GN=MAP70.2 PE=1 SV=1	S	Function unknown	microtubule-associated protein 70-2-like [Quercus suber]	biological process: response to stimulus (GO:0050896);; biological process: cellular process (GO:0009987);; biological process: cellular component organization or biogenesis (GO:0071840);; molecular function: binding (GO:0005488)
EVM0026731	EVM0026731	0.738621	0.152967	0.0224005	4.19219e-06	-4.01748	down	0.0242929	-1.64631	normal	--	--	--	--	--	--	--	--	--	--	Sieve element occlusion N-terminus;; Sieve element occlusion C-terminus	Protein SIEVE ELEMENT OCCLUSION B OS=Arabidopsis thaliana OX=3702 GN=SEOB PE=1 SV=1	S	Function unknown	protein sieve element occlusion b [Quercus suber]	--
EVM0024794	EVM0024794	10.0127	5.04095	0.300525	1.69833e-25	-4.23486	down	0.104813	-0.50685	normal	0.0041957	-2.65294	down	[IR]	Lipid transport and metabolism;; General function prediction only	Cellular Component: membrane (GO:0016020);; Molecular Function: hydrolase activity, acting on ester bonds (GO:0016788);;	K21026|3.89611e-127|pper:PRUPE_ppa019092mg|K21026 acetylajmaline esterase [EC:3.1.1.80] | (RefSeq) hypothetical protein	--	--	--	GDSL-like Lipase/Acylhydrolase	GDSL esterase/lipase At1g28580 OS=Arabidopsis thaliana OX=3702 GN=At1g28580 PE=2 SV=1	S	Function unknown	GDSL esterase/lipase At1g28570-like [Quercus suber]	cellular component: membrane (GO:0016020);; molecular function: catalytic activity (GO:0003824)
EVM0029086	EVM0029086	18.693	29.3675	47.7953	9.70652e-14	2.21783	up	2.70614e-12	1.12146	up	0.264833	1.00923	normal	--	--	Biological Process: ubiquitin-dependent protein catabolic process (GO:0006511);;	--	--	[O]	Posttranslational modification, protein turnover, chaperones	Ubiquitin fusion degradation protein UFD1	--	O	Posttranslational modification, protein turnover, chaperones	LOW QUALITY PROTEIN: uncharacterized protein LOC111999186 [Quercus suber]	biological process: metabolic process (GO:0008152);; biological process: cellular process (GO:0009987)
EVM0028462	EVM0028462	13.627	0.32923	0.110994	2.88286e-40	-5.92982	down	1.47566e-37	-4.78453	down	--	--	--	[L]	Replication, recombination and repair	Molecular Function: hydrolase activity (GO:0016787);; Molecular Function: organic cyclic compound binding (GO:0097159);; Molecular Function: heterocyclic compound binding (GO:1901363);;	K11594|0|tcc:TCM_038054|K11594 ATP-dependent RNA helicase DDX3X [EC:3.6.4.13] | (RefSeq) P-loop containing nucleoside triphosphate hydrolases superfamily protein	--	[A]	RNA processing and modification	DEAD/DEAH box helicase;; Helicase conserved C-terminal domain	DEAD-box ATP-dependent RNA helicase 37 OS=Oryza sativa subsp. japonica OX=39947 GN=PL10A PE=2 SV=1	L	Replication, recombination and repair	dead-box atp-dependent rna helicase 37 [Quercus suber]	molecular function: catalytic activity (GO:0003824);; molecular function: binding (GO:0005488)
EVM0002369	EVM0002369	13.8196	34.4563	27.4262	7.90161e-38	1.80227	up	1.20558e-23	1.78343	up	0.995177	0.04609	normal	[T]	Signal transduction mechanisms	Molecular Function: protein serine/threonine kinase activity (GO:0004674);; Molecular Function: ATP binding (GO:0005524);; Biological Process: protein phosphorylation (GO:0006468);;	--	--	[T]	Signal transduction mechanisms	Protein tyrosine kinase;; Protein kinase domain;; Kinase-like	Serine/threonine-protein kinase STY13 OS=Arabidopsis thaliana OX=3702 GN=STY13 PE=1 SV=2	T	Signal transduction mechanisms	serine/threonine-protein kinase STY13-like isoform X2 [Quercus suber]	molecular function: catalytic activity (GO:0003824);; biological process: metabolic process (GO:0008152);; biological process: cellular process (GO:0009987);; molecular function: binding (GO:0005488)
Castanea_mollissima_newGene_7852	--	1.62789	0.088856	0	0.000114956	-6.49694	down	0.000841152	-3.21165	down	--	--	--	--	--	Cellular Component: integral component of membrane (GO:0016021);; Molecular Function: kinase activity (GO:0016301);; Biological Process: phosphorylation (GO:0016310);; Biological Process: cell division (GO:0051301);;	K13525|2.66624e-55|mtr:MTR_0041s0130|K13525 transitional endoplasmic reticulum ATPase | (RefSeq) cell division control-like protein	Protein processing in endoplasmic reticulum (ko04141)	[O]	Posttranslational modification, protein turnover, chaperones	Cell division protein 48 (CDC48), N-terminal domain	Cell division cycle protein 48 homolog OS=Glycine max OX=3847 GN=CDC48 PE=2 SV=1	O	Posttranslational modification, protein turnover, chaperones	cell division cycle protein 48 like [Quercus suber]	cellular component: membrane (GO:0016020);; cellular component: membrane part (GO:0044425);; molecular function: catalytic activity (GO:0003824);; biological process: metabolic process (GO:0008152);; biological process: cellular process (GO:0009987);; biological process: single-organism process (GO:0044699)
EVM0016658	EVM0016658	2.68784	7.17419	8.23473	3.3694e-15	2.40094	up	8.07785e-05	1.84092	up	0.906181	0.47714	normal	--	--	Biological Process: vesicle docking involved in exocytosis (GO:0006904);;	K12479|8.51447e-115|tcc:TCM_035451|K12479 vacuolar protein sorting-associated protein 45 | (RefSeq) Vacuolar protein sorting 45	Endocytosis (ko04144)	[U]	Intracellular trafficking, secretion, and vesicular transport	Sec1 family	Vacuolar protein sorting-associated protein 45 homolog OS=Arabidopsis thaliana OX=3702 GN=VPS45 PE=1 SV=2	U	Intracellular trafficking, secretion, and vesicular transport	vacuolar protein sorting-associated protein 45 homolog [Quercus suber]	biological process: cellular process (GO:0009987);; biological process: single-organism process (GO:0044699);; biological process: localization (GO:0051179)
EVM0010489	EVM0010489	0.0906553	1.71789	2.68066	1.69446e-11	5.38401	up	0.0024601	3.76317	up	0.851723	0.714905	normal	--	--	--	--	--	--	--	--	--	S	Function unknown	hypothetical protein CFP56_14179 [Quercus suber]	--
EVM0007007	EVM0007007	4.76198	0.971159	0.193976	1.39208e-24	-3.67904	down	1.0567e-08	-1.80432	down	0.704972	-1.01178	normal	--	--	--	--	--	--	--	Domain of unknown function (DUF4220);; Protein of unknown function, DUF594	--	S	Function unknown	hypothetical protein CFP56_16005 [Quercus suber]	--
EVM0032874	EVM0032874	50.7778	168.418	111.065	2.75577e-13	1.88076	up	1.29548e-57	2.19717	up	0.964374	-0.2418	normal	--	--	Biological Process: metabolic process (GO:0008152);; Molecular Function: amino acid binding (GO:0016597);;	--	--	--	--	ACT domain;; ACT domain	ACT domain-containing protein ACR10 OS=Arabidopsis thaliana OX=3702 GN=ACR10 PE=2 SV=1	S	Function unknown	ACT domain-containing protein ACR10 [Quercus suber]	biological process: metabolic process (GO:0008152);; molecular function: binding (GO:0005488)
EVM0017961	EVM0017961	0.07342	0.949743	2.91869	0.0207997	4.48332	normal	0.413058	1.24558	normal	0.23727	1.4505	normal	--	--	Biological Process: flavonoid biosynthetic process (GO:0009813);; Cellular Component: intracellular membrane-bounded organelle (GO:0043231);; Biological Process: flavonoid glucuronidation (GO:0052696);; Molecular Function: quercetin 3-O-glucosyltransferase activity (GO:0080043);; Molecular Function: quercetin 7-O-glucosyltransferase activity (GO:0080044);;	K13496|3.45768e-168|vvi:100246560|K13496 UDP-glucosyl transferase 73C [EC:2.4.1.-] | (RefSeq) scopoletin glucosyltransferase	--	[GC]	Carbohydrate transport and metabolism;; Energy production and conversion	UDP-glucoronosyl and UDP-glucosyl transferase	UDP-glycosyltransferase 73C3 OS=Arabidopsis thaliana OX=3702 GN=UGT73C3 PE=2 SV=1	S	Function unknown	UDP-glycosyltransferase 73C3-like [Quercus suber]	biological process: metabolic process (GO:0008152);; cellular component: cell (GO:0005623);; cellular component: organelle (GO:0043226);; cellular component: cell part (GO:0044464);; biological process: cellular process (GO:0009987);; biological process: single-organism process (GO:0044699);; molecular function: catalytic activity (GO:0003824)
EVM0024058	EVM0024058	9.80424	2.0646	0.167382	1.02246e-45	-4.99632	down	6.11591e-11	-1.7533	down	0.0265291	-2.25642	normal	--	--	Cellular Component: proteasome complex (GO:0000502);;	K06699|0|tcc:TCM_030528|K06699 proteasome activator subunit 4 | (RefSeq) Proteasome activating protein 200 isoform 1	Proteasome (ko03050)	[S]	Function unknown	Proteasome-substrate-size regulator, mid region	Proteasome activator subunit 4 OS=Arabidopsis thaliana OX=3702 GN=PA200 PE=2 SV=2	O	Posttranslational modification, protein turnover, chaperones	proteasome activator subunit 4-like [Quercus suber]	cellular component: cell (GO:0005623);; cellular component: macromolecular complex (GO:0032991);; cellular component: cell part (GO:0044464)
EVM0013457	EVM0013457	6.37268	0.57585	0.178364	5.21692e-24	-4.20765	down	8.90307e-14	-2.93705	down	0.927176	-0.563931	normal	[T]	Signal transduction mechanisms	--	--	--	[R]	General function prediction only	Ankyrin repeats (3 copies);; Ankyrin repeats (many copies);; Domain of unknown function;; Ankyrin repeat;; Ankyrin repeats (many copies);; Ankyrin repeat	Protein ACCELERATED CELL DEATH 6 OS=Arabidopsis thaliana OX=3702 GN=ACD6 PE=1 SV=1	S	Function unknown	ankyrin repeat-containing protein ITN1-like [Quercus suber]	--
EVM0019746	EVM0019746	203.363	0.2195	0.0127285	2.10001e-52	-12.4875	down	1.16687e-149	-9.21976	down	--	--	--	[QV]	Secondary metabolites biosynthesis, transport and catabolism;; Defense mechanisms	Molecular Function: monooxygenase activity (GO:0004497);; Molecular Function: iron ion binding (GO:0005506);; Cellular Component: endoplasmic reticulum (GO:0005783);; Biological Process: positive regulation of cell proliferation (GO:0008284);; Cellular Component: integral component of membrane (GO:0016021);; Molecular Function: oxidoreductase activity, acting on paired donors, with incorporation …	K00517|0|mdm:103402809|K00517 [EC:1.14.-.-] | (RefSeq) cytochrome P450 78A5-like	Limonene and pinene degradation (ko00903);; Stilbenoid, diarylheptanoid and gingerol biosynthesis (ko00945)	[Q]	Secondary metabolites biosynthesis, transport and catabolism	Cytochrome P450	Cytochrome P450 78A5 OS=Arabidopsis thaliana OX=3702 GN=CYP78A5 PE=2 SV=1	Q	Secondary metabolites biosynthesis, transport and catabolism	cytochrome P450 78A5-like [Quercus suber]	molecular function: catalytic activity (GO:0003824);; biological process: metabolic process (GO:0008152);; biological process: single-organism process (GO:0044699);; molecular function: binding (GO:0005488);; cellular component: cell (GO:0005623);; cellular component: organelle (GO:0043226);; cellular component: cell part (GO:0044464);; biological process: biological regulation (GO:0065007);; cel…
EVM0005622	EVM0005622	10.7375	0.599944	0.10767	5.90206e-39	-5.66472	down	7.59258e-45	-3.654	down	0.734937	-0.972146	normal	--	--	Cellular Component: microtubule (GO:0005874);;	--	--	--	--	HEAT repeats;; HEAT repeat;; HEAT repeat associated with sister chromatid cohesion	TORTIFOLIA1-like protein 2 OS=Arabidopsis thaliana OX=3702 GN=TOR1L2 PE=4 SV=1	S	Function unknown	TORTIFOLIA1-like protein 2 [Quercus suber]	cellular component: cell (GO:0005623);; cellular component: organelle (GO:0043226);; cellular component: organelle part (GO:0044422);; cellular component: cell part (GO:0044464);; cellular component: supramolecular complex (GO:0099080)
EVM0015284	EVM0015284	4.42069	80.8649	309.51	1.52589e-38	6.94888	up	8.71078e-67	4.61845	up	0.00799639	2.01486	up	[G]	Carbohydrate transport and metabolism	Cellular Component: integral component of membrane (GO:0016021);; Molecular Function: substrate-specific transmembrane transporter activity (GO:0022891);; Biological Process: transmembrane transport (GO:0055085);;	K08145|0|rcu:8262358|K08145 MFS transporter, SP family, solute carrier family 2 (facilitated glucose transporter), member 8 | (RefSeq) sugar transporter ERD6-like 16	--	[R]	General function prediction only	Sugar (and other) transporter;; Major Facilitator Superfamily	Sugar transporter ERD6-like 16 OS=Arabidopsis thaliana OX=3702 GN=At5g18840 PE=2 SV=2	G	Carbohydrate transport and metabolism	sugar transporter ERD6-like 16 [Quercus suber]	cellular component: membrane (GO:0016020);; cellular component: membrane part (GO:0044425);; molecular function: transporter activity (GO:0005215);; biological process: localization (GO:0051179)
EVM0014459	EVM0014459	19.1282	22.5488	31.4584	1.93969e-10	1.56752	up	0.000114327	0.70787	up	0.457831	0.802944	normal	--	--	Molecular Function: RNA polymerase II regulatory region sequence-specific DNA binding (GO:0000977);; Molecular Function: RNA polymerase II transcription factor binding (GO:0001085);; Molecular Function: transcriptional activator activity, RNA polymerase II transcription regulatory region sequence-specific binding (GO:0001228);; Molecular Function: chromatin binding (GO:0003682);; Cellular Compone…	--	--	[K]	Transcription	CCT motif;; GATA zinc finger;; tify domain;; Divergent CCT motif	GATA transcription factor 24 OS=Arabidopsis thaliana OX=3702 GN=GATA24 PE=1 SV=2	K	Transcription	GATA transcription factor 24-like isoform X4 [Quercus suber]	molecular function: binding (GO:0005488);; molecular function: nucleic acid binding transcription factor activity (GO:0001071);; biological process: biological regulation (GO:0065007);; cellular component: cell (GO:0005623);; cellular component: organelle (GO:0043226);; cellular component: cell part (GO:0044464);; cellular component: macromolecular complex (GO:0032991);; biological process: cellu…
EVM0010369	EVM0010369	40.0846	12.8387	2.94012	3.37017e-61	-2.95606	down	1.47973e-09	-1.16815	down	0.0383815	-1.53758	normal	[O]	Posttranslational modification, protein turnover, chaperones	--	--	--	[O]	Posttranslational modification, protein turnover, chaperones	DnaJ domain	Protein ADMETOS OS=Arabidopsis thaliana OX=3702 GN=ADM PE=2 SV=1	O	Posttranslational modification, protein turnover, chaperones	uncharacterized protein LOC111985061 [Quercus suber]	--
EVM0004573	EVM0004573	2.69417	1.00645	0.602881	2.53596e-06	-1.30838	down	0.00956617	-0.926132	down	0.987925	-0.230309	normal	--	--	--	K13459|1.06867e-169|jcu:105628531|K13459 disease resistance protein RPS2 | (RefSeq) probable disease resistance protein At1g12280	Plant-pathogen interaction (ko04626)	[T]	Signal transduction mechanisms	NB-ARC domain;; Leucine Rich repeats (2 copies)	Disease resistance protein SUMM2 OS=Arabidopsis thaliana OX=3702 GN=SUMM2 PE=1 SV=1	S	Function unknown	disease resistance protein At4g27190-like [Quercus suber]	--
EVM0025717	EVM0025717	3.21137	13.8108	17.1401	5.63741e-12	3.27524	up	6.91733e-09	2.5338	up	0.736427	0.655739	normal	[H]	Coenzyme transport and metabolism	Molecular Function: L-aspartate oxidase activity (GO:0008734);; Biological Process: NAD biosynthetic process (GO:0009435);; Cellular Component: chloroplast (GO:0009507);; Molecular Function: L-aspartate:fumarate oxidoreductase activity (GO:0044318);; Biological Process: oxidation-reduction process (GO:0055114);;	K00278|0|pxb:103963954|K00278 L-aspartate oxidase [EC:1.4.3.16] | (RefSeq) L-aspartate oxidase, chloroplastic-like	Alanine, aspartate and glutamate metabolism (ko00250);; Nicotinate and nicotinamide metabolism (ko00760)	[C]	Energy production and conversion	FAD binding domain;; Fumarate reductase flavoprotein C-term;; FAD dependent oxidoreductase	L-aspartate oxidase, chloroplastic OS=Arabidopsis thaliana OX=3702 GN=AO PE=1 SV=1	H	Coenzyme transport and metabolism	L-aspartate oxidase, chloroplastic [Quercus suber]	molecular function: catalytic activity (GO:0003824);; biological process: metabolic process (GO:0008152);; biological process: single-organism process (GO:0044699);; biological process: cellular process (GO:0009987);; cellular component: cell (GO:0005623);; cellular component: organelle (GO:0043226);; cellular component: cell part (GO:0044464)
EVM0031609	EVM0031609	0.766526	1.33568	0.208835	0.0061773	-1.0439	down	0.00326865	1.25115	up	0.243209	-1.57055	normal	[K]	Transcription	--	--	--	[R]	General function prediction only	Leucine rich repeat;; Leucine Rich repeats (2 copies);; Leucine Rich Repeat;; Leucine Rich repeat	Receptor-like protein 15 OS=Arabidopsis thaliana OX=3702 GN=RLP15 PE=3 SV=1	S	Function unknown	leucine-rich repeat receptor protein kinase EMS1-like [Quercus suber]	--
EVM0001075	EVM0001075	12.3369	32.3792	32.2885	1.19613e-24	2.23334	up	6.68068e-41	1.86242	up	0.909732	0.367202	normal	[O]	Posttranslational modification, protein turnover, chaperones	Biological Process: phosphatidylinositol metabolic process (GO:0046488);;	K00921|0|pper:PRUPE_ppa000155mg|K00921 1-phosphatidylinositol-3-phosphate 5-kinase [EC:2.7.1.150] | (RefSeq) hypothetical protein	Inositol phosphate metabolism (ko00562);; Phosphatidylinositol signaling system (ko04070);; Phagosome (ko04145)	[T]	Signal transduction mechanisms	TCP-1/cpn60 chaperonin family;; Phosphatidylinositol-4-phosphate 5-Kinase	Putative 1-phosphatidylinositol-3-phosphate 5-kinase FAB1D OS=Arabidopsis thaliana OX=3702 GN=FAB1D PE=3 SV=1	O	Posttranslational modification, protein turnover, chaperones	PREDICTED: putative 1-phosphatidylinositol-3-phosphate 5-kinase FAB1D isoform X1 [Juglans regia]	biological process: metabolic process (GO:0008152);; biological process: cellular process (GO:0009987);; biological process: single-organism process (GO:0044699)
Castanea_mollissima_newGene_5189	--	1.46609	0.595804	0.111728	0.0064351	-2.62373	down	0.299008	-0.845222	normal	--	--	--	--	--	--	K14797|1.34101e-20|gra:105792972|K14797 essential nuclear protein 1 | (RefSeq) bystin	--	[W]	Extracellular structures	--	--	S	Function unknown	bystin-like isoform X2 [Quercus suber]	--
EVM0017981	EVM0017981	48.3578	2.24464	0.30772	3.01298e-180	-6.43665	down	2.01432e-122	-3.94331	down	0.0686706	-1.86153	normal	[K]	Transcription	Molecular Function: protein kinase activity (GO:0004672);; Molecular Function: ATP binding (GO:0005524);; Cellular Component: cell wall (GO:0005618);; Cellular Component: plasma membrane (GO:0005886);; Biological Process: protein phosphorylation (GO:0006468);; Cellular Component: integral component of membrane (GO:0016021);; Biological Process: positive regulation of secondary growth (GO:2000605)…	--	--	--	--	Protein kinase domain;; Protein tyrosine kinase;; Leucine rich repeat;; Leucine rich repeat N-terminal domain;; Leucine Rich repeats (2 copies);; Leucine Rich Repeat	Probable inactive receptor kinase At5g58300 OS=Arabidopsis thaliana OX=3702 GN=At5g58300 PE=2 SV=1	T	Signal transduction mechanisms	probable inactive receptor kinase At5g58300 [Quercus suber]	molecular function: catalytic activity (GO:0003824);; biological process: metabolic process (GO:0008152);; biological process: cellular process (GO:0009987);; molecular function: binding (GO:0005488);; cellular component: cell (GO:0005623);; cellular component: cell part (GO:0044464);; cellular component: membrane (GO:0016020);; cellular component: membrane part (GO:0044425);; biological process:…
EVM0026622	EVM0026622	2.23006	2.61616	4.83826	2.84839e-09	1.94659	up	0.137732	0.692078	normal	0.32709	1.09048	normal	--	--	Cellular Component: membrane (GO:0016020);;	--	--	--	--	--	--	S	Function unknown	uncharacterized protein LOC112032291 [Quercus suber]	cellular component: membrane (GO:0016020)
EVM0021683	EVM0021683	0.485986	89.7313	448.124	3.81259e-98	10.5438	up	1.5558e-18	7.37248	up	7.01762e-06	2.45752	up	[IR]	Lipid transport and metabolism;; General function prediction only	Molecular Function: oxidoreductase activity, acting on CH-OH group of donors (GO:0016614);; Molecular Function: lyase activity (GO:0016829);; Molecular Function: flavin adenine dinucleotide binding (GO:0050660);; Biological Process: oxidation-reduction process (GO:0055114);;	--	--	[R]	General function prediction only	GMC oxidoreductase;; GMC oxidoreductase	Protein HOTHEAD OS=Arabidopsis thaliana OX=3702 GN=HTH PE=1 SV=1	E	Amino acid transport and metabolism	protein HOTHEAD-like [Quercus suber]	molecular function: catalytic activity (GO:0003824);; biological process: metabolic process (GO:0008152);; biological process: single-organism process (GO:0044699);; molecular function: binding (GO:0005488)
EVM0032064	EVM0032064	5.67974	11.1746	32.6258	1.29282e-26	3.36029	up	7.83424e-05	1.42813	up	0.0092505	1.72796	up	--	--	Biological Process: response to auxin (GO:0009733);;	--	--	--	--	Auxin responsive protein	Auxin-responsive protein SAUR32 OS=Arabidopsis thaliana OX=3702 GN=SAUR32 PE=2 SV=1	S	Function unknown	PREDICTED: auxin-responsive protein SAUR32-like [Juglans regia]	biological process: response to stimulus (GO:0050896)
EVM0015085	EVM0015085	12.3545	2.2938	0.868898	1.8059e-21	-3.05724	down	1.2445e-20	-1.94423	down	0.755939	-0.817289	normal	[T]	Signal transduction mechanisms	Molecular Function: protein serine/threonine kinase activity (GO:0004674);; Molecular Function: ATP binding (GO:0005524);; Cellular Component: plasma membrane (GO:0005886);; Biological Process: protein phosphorylation (GO:0006468);; Biological Process: regulation of asymmetric cell division (GO:0009786);; Biological Process: embryo development ending in seed dormancy (GO:0009793);; Cellular Compo…	--	--	--	--	Protein tyrosine kinase;; Protein kinase domain;; Regulator of chromosome condensation (RCC1) repeat	Serine/threonine-protein kinase-like protein ACR4 OS=Arabidopsis thaliana OX=3702 GN=ACR4 PE=1 SV=1	T	Signal transduction mechanisms	serine/threonine-protein kinase-like protein ACR4 [Quercus suber]	molecular function: catalytic activity (GO:0003824);; biological process: metabolic process (GO:0008152);; biological process: cellular process (GO:0009987);; molecular function: binding (GO:0005488);; cellular component: cell (GO:0005623);; cellular component: membrane (GO:0016020);; cellular component: cell part (GO:0044464);; biological process: biological regulation (GO:0065007);; biological …
EVM0010247	EVM0010247	123.865	19.3273	7.69757	1.68136e-50	-3.16577	down	5.71868e-31	-2.20177	down	0.467491	-0.828786	normal	--	--	Molecular Function: GTPase activity (GO:0003924);; Molecular Function: structural constituent of cytoskeleton (GO:0005200);; Molecular Function: GTP binding (GO:0005525);; Cellular Component: cytoplasm (GO:0005737);; Cellular Component: microtubule (GO:0005874);; Biological Process: microtubule-based process (GO:0007017);;	K07375|0|fve:101305819|K07375 tubulin beta | (RefSeq) tubulin beta chain-like	Phagosome (ko04145)	[Z]	Cytoskeleton	Tubulin/FtsZ family, GTPase domain;; Tubulin C-terminal domain	Tubulin beta-6 chain OS=Gossypium hirsutum OX=3635 PE=2 SV=1	Z	Cytoskeleton	tubulin beta chain-like [Quercus suber]	molecular function: catalytic activity (GO:0003824);; molecular function: structural molecule activity (GO:0005198);; molecular function: binding (GO:0005488);; cellular component: cell (GO:0005623);; cellular component: cell part (GO:0044464);; cellular component: organelle (GO:0043226);; cellular component: organelle part (GO:0044422);; cellular component: supramolecular complex (GO:0099080);; …
EVM0007964	EVM0007964	1.65636	1.69335	1.40758	0.355205	0.700764	normal	0.583078	0.46858	normal	0.994034	0.126311	normal	[T]	Signal transduction mechanisms	Molecular Function: calcium ion binding (GO:0005509);; Molecular Function: 2-alkenal reductase [NAD(P)] activity (GO:0032440);; Biological Process: oxidation-reduction process (GO:0055114);;	--	--	[T]	Signal transduction mechanisms	EF hand;; EF-hand domain pair;; EF-hand domain pair;; EF hand;; EF-hand domain;; EF-hand domain;; Secreted protein acidic and rich in cysteine Ca binding region;; Cytoskeletal-regulatory complex EF hand	Calmodulin OS=Mougeotia scalaris OX=13158 PE=2 SV=3	DTZ	Cell cycle control, cell division, chromosome partitioning;; Signal transduction mechanisms;; Cytoskeleton	calmodulin-like protein 11 [Quercus suber]	molecular function: binding (GO:0005488);; molecular function: catalytic activity (GO:0003824);; biological process: metabolic process (GO:0008152);; biological process: single-organism process (GO:0044699)
EVM0003601	EVM0003601	216.2	5.44102	0.283625	2.40804e-137	-8.64427	down	9.49196e-99	-4.81258	down	0.00191354	-2.76293	down	--	--	--	--	--	--	--	SAM domain (Sterile alpha motif)	--	S	Function unknown	uncharacterized protein LOC112035254 [Quercus suber]	--
EVM0011899	EVM0011899	0.827566	2.37248	2.31142	2.77579e-05	2.18727	up	0.00469935	1.88942	up	0.989303	0.208714	normal	[G]	Carbohydrate transport and metabolism	Molecular Function: hydrolase activity, hydrolyzing O-glycosyl compounds (GO:0004553);; Biological Process: carbohydrate metabolic process (GO:0005975);;	K01188|0|jcu:105650486|K01188 beta-glucosidase [EC:3.2.1.21] | (RefSeq) beta-glucosidase 12-like	Cyanoamino acid metabolism (ko00460);; Starch and sucrose metabolism (ko00500);; Phenylpropanoid biosynthesis (ko00940)	[G]	Carbohydrate transport and metabolism	Glycosyl hydrolase family 1	Beta-glucosidase 12 OS=Oryza sativa subsp. indica OX=39946 GN=BGLU12 PE=3 SV=1	G	Carbohydrate transport and metabolism	beta-glucosidase 12-like isoform X1 [Quercus suber]	molecular function: catalytic activity (GO:0003824);; biological process: metabolic process (GO:0008152)
EVM0010292	EVM0010292	12.2228	4.02985	4.08916	0.0233639	-0.703303	normal	1.83727e-10	-1.12303	down	0.927176	0.387074	normal	--	--	--	--	--	--	--	Formin Homology 2 Domain;; C2 domain of PTEN tumour-suppressor protein	Formin-like protein 18 OS=Arabidopsis thaliana OX=3702 GN=FH18 PE=2 SV=3	S	Function unknown	formin-like protein 6, partial [Quercus suber]	--
EVM0012044	EVM0012044	23.4285	6.23238	1.86393	2.59695e-85	-2.82283	down	4.60621e-24	-1.43279	down	0.166591	-1.19315	normal	--	--	Biological Process: regulation of monopolar cell growth (GO:0051513);;	--	--	--	--	Domain of unknown function (DUF4378);; DUF761-associated sequence motif	Protein LONGIFOLIA 1 OS=Arabidopsis thaliana OX=3702 GN=LNG1 PE=1 SV=1	S	Function unknown	protein LONGIFOLIA 1 [Quercus suber]	biological process: biological regulation (GO:0065007)
EVM0019084	EVM0019084	35.9037	2.50135	0.982408	6.23334e-47	-4.40011	down	1.00647e-61	-3.35435	down	0.805919	-0.756794	normal	[T]	Signal transduction mechanisms	Molecular Function: ATP binding (GO:0005524);; Cellular Component: plasma membrane (GO:0005886);; Cellular Component: integral component of membrane (GO:0016021);; Molecular Function: ATPase activity, coupled to transmembrane movement of substances (GO:0042626);; Biological Process: transmembrane transport (GO:0055085);;	--	--	[Q]	Secondary metabolites biosynthesis, transport and catabolism	ABC-2 type transporter;; ABC transporter;; AAA domain, putative AbiEii toxin, Type IV TA system	ABC transporter G family member 8 OS=Arabidopsis thaliana OX=3702 GN=ABCG8 PE=2 SV=1	V	Defense mechanisms	ABC transporter G family member 4-like [Quercus suber]	molecular function: binding (GO:0005488);; cellular component: cell (GO:0005623);; cellular component: membrane (GO:0016020);; cellular component: cell part (GO:0044464);; cellular component: membrane part (GO:0044425);; molecular function: catalytic activity (GO:0003824);; molecular function: transporter activity (GO:0005215);; biological process: localization (GO:0051179)
EVM0018957	EVM0018957	2.84039	0.672041	0.333225	6.56783e-05	-2.10275	down	0.0229321	-1.49506	normal	--	--	--	--	--	--	--	--	--	--	--	Protein At-4/1 OS=Arabidopsis thaliana OX=3702 GN=At4g26020 PE=1 SV=1	S	Function unknown	protein At-4/1-like [Quercus suber]	--
EVM0003116	EVM0003116	5.99285	2.84488	1.09997	4.95903e-05	-1.65462	down	0.169496	-0.58551	normal	0.901111	-0.644495	normal	--	--	--	--	--	--	--	--	--	S	Function unknown	uncharacterized protein LOC112003974 isoform X2 [Quercus suber]	--
EVM0031776	EVM0031776	1.39036	0.127594	0	7.99122e-06	-7.23481	down	0.000143666	-2.7426	down	--	--	--	[K]	Transcription	Molecular Function: protein kinase activity (GO:0004672);; Molecular Function: ATP binding (GO:0005524);; Biological Process: protein phosphorylation (GO:0006468);; Cellular Component: integral component of membrane (GO:0016021);; Molecular Function: 2-alkenal reductase [NAD(P)] activity (GO:0032440);; Biological Process: oxidation-reduction process (GO:0055114);;	--	--	--	--	Leucine rich repeat;; Leucine Rich repeats (2 copies)	Probable inactive leucine-rich repeat receptor-like protein kinase At3g03770 OS=Arabidopsis thaliana OX=3702 GN=At3g03770 PE=2 SV=1	S	Function unknown	probable inactive leucine-rich repeat receptor-like protein kinase At3g03770 [Quercus suber]	molecular function: catalytic activity (GO:0003824);; biological process: metabolic process (GO:0008152);; biological process: cellular process (GO:0009987);; molecular function: binding (GO:0005488);; cellular component: membrane (GO:0016020);; cellular component: membrane part (GO:0044425);; biological process: single-organism process (GO:0044699)
EVM0007972	EVM0007972	1.15411	0.023208	0.028146	6.18046e-08	-4.27898	down	4.54774e-06	-4.34903	down	--	--	--	--	--	Molecular Function: transcription factor activity, sequence-specific DNA binding (GO:0003700);; Cellular Component: nucleus (GO:0005634);; Biological Process: regulation of transcription, DNA-templated (GO:0006355);; Molecular Function: sequence-specific DNA binding (GO:0043565);;	--	--	--	--	GRAS domain family	Scarecrow-like protein 32 OS=Arabidopsis thaliana OX=3702 GN=SCL32 PE=1 SV=1	S	Function unknown	scarecrow-like protein 32 [Quercus suber]	molecular function: nucleic acid binding transcription factor activity (GO:0001071);; biological process: biological regulation (GO:0065007);; cellular component: cell (GO:0005623);; cellular component: organelle (GO:0043226);; cellular component: cell part (GO:0044464);; molecular function: binding (GO:0005488)
EVM0011367	EVM0011367	0.50461	13.3187	80.4058	6.13212e-51	8.09197	up	1.25669e-24	5.05327	up	4.36882e-05	2.60384	up	[IR]	Lipid transport and metabolism;; General function prediction only	--	--	--	--	--	GDSL-like Lipase/Acylhydrolase	GDSL esterase/lipase 1 OS=Arabidopsis thaliana OX=3702 GN=GLIP1 PE=1 SV=1	S	Function unknown	GDSL esterase/lipase 1-like [Quercus suber]	--
EVM0007586	EVM0007586	40.3238	144.891	212.671	3.19699e-45	3.24464	up	3.81093e-69	2.31406	up	0.333813	0.876698	normal	--	--	Cellular Component: membrane (GO:0016020);; Molecular Function: metal ion binding (GO:0046872);;	--	--	[O]	Posttranslational modification, protein turnover, chaperones	Ring finger domain;; RING-like zinc finger;; Zinc finger, C3HC4 type (RING finger);; Zinc finger, C3HC4 type (RING finger)	RING-H2 finger protein ATL2 OS=Arabidopsis thaliana OX=3702 GN=ATL2 PE=2 SV=2	O	Posttranslational modification, protein turnover, chaperones	RING-H2 finger protein ATL2 [Quercus suber]	cellular component: membrane (GO:0016020);; molecular function: binding (GO:0005488)
EVM0019196	EVM0019196	2.85047	0.737192	0.151523	1.51557e-12	-3.39997	down	0.00230897	-1.42852	down	0.787376	-0.880413	normal	[G]	Carbohydrate transport and metabolism	Molecular Function: ribokinase activity (GO:0004747);; Biological Process: D-ribose metabolic process (GO:0006014);; Biological Process: carbohydrate phosphorylation (GO:0046835);;	--	--	[G]	Carbohydrate transport and metabolism	pfkB family carbohydrate kinase	--	G	Carbohydrate transport and metabolism	ribokinase [Quercus suber]	molecular function: catalytic activity (GO:0003824);; biological process: metabolic process (GO:0008152);; biological process: cellular process (GO:0009987);; biological process: single-organism process (GO:0044699)
EVM0017547	EVM0017547	1.24238	10.0877	12.3952	7.45893e-20	4.10683	up	2.96675e-10	3.38627	up	0.735092	0.615474	normal	--	--	--	--	--	--	--	--	--	--	--	uncharacterized protein LOC112027220 [Quercus suber]	--
Castanea_mollissima_newGene_7994	--	0	3.8745	185.201	4.20129e-35	15.12	up	5.24267e-14	8.69315	up	2.65018e-25	5.25617	up	--	--	Biological Process: killing of cells of other organism (GO:0031640);; Cellular Component: apoplast (GO:0048046);; Biological Process: defense response to fungus (GO:0050832);;	--	--	--	--	Thaumatin family	Thaumatin-like protein 1 OS=Castanea sativa OX=21020 GN=TL1 PE=2 SV=1	S	Function unknown	thaumatin-like protein 1 [Quercus suber]	biological process: cell killing (GO:0001906);; biological process: multi-organism process (GO:0051704);; cellular component: extracellular region (GO:0005576);; biological process: response to stimulus (GO:0050896)
EVM0020196	EVM0020196	2.42448	0.723629	0.618463	0.111161	-1.00512	normal	0.0406395	-1.22443	normal	--	--	--	--	--	--	--	--	--	--	FHA domain;; Inner membrane component of T3SS, cytoplasmic domain	FHA domain-containing protein At4g14490 OS=Arabidopsis thaliana OX=3702 GN=At4g14490 PE=1 SV=1	T	Signal transduction mechanisms	FHA domain-containing protein At4g14490-like [Quercus suber]	--
EVM0011644	EVM0011644	0.300151	0.997226	4.36923	4.30355e-11	4.65642	up	0.00410156	2.0577	up	0.0380623	1.97252	normal	[K]	Transcription	Molecular Function: protein serine/threonine kinase activity (GO:0004674);; Molecular Function: ATP binding (GO:0005524);; Biological Process: protein phosphorylation (GO:0006468);; Cellular Component: integral component of membrane (GO:0016021);;	--	--	--	--	Protein kinase domain;; Protein tyrosine kinase;; Leucine rich repeat;; Leucine Rich repeats (2 copies);; Leucine rich repeat N-terminal domain;; Leucine Rich Repeat	Probable LRR receptor-like serine/threonine-protein kinase At3g47570 OS=Arabidopsis thaliana OX=3702 GN=At3g47570 PE=2 SV=1	S	Function unknown	probable LRR receptor-like serine/threonine-protein kinase At3g47570 [Quercus suber]	molecular function: catalytic activity (GO:0003824);; biological process: metabolic process (GO:0008152);; biological process: cellular process (GO:0009987);; molecular function: binding (GO:0005488);; cellular component: membrane (GO:0016020);; cellular component: membrane part (GO:0044425)
EVM0022491	EVM0022491	1.05054	14.1136	21.0815	3.34289e-44	5.13015	up	1.44542e-19	4.12728	up	0.420612	0.871774	normal	--	--	--	--	--	[I]	Lipid transport and metabolism	GDSL-like Lipase/Acylhydrolase family;; GDSL-like Lipase/Acylhydrolase	GDSL esterase/lipase At2g38180 OS=Arabidopsis thaliana OX=3702 GN=At2g38180 PE=2 SV=1	E	Amino acid transport and metabolism	gdsl esterase/lipase cprd49 [Quercus suber]	--
EVM0033161	EVM0033161	5.19005	0.66791	0.109943	2.91752e-18	-4.47433	down	2.87358e-10	-2.42489	down	0.811907	-0.833559	normal	--	--	Biological Process: cellular process (GO:0009987);;	K14484|1.29528e-87|gra:105771085|K14484 auxin-responsive protein IAA | (RefSeq) auxin-responsive protein IAA6-like	Plant hormone signal transduction (ko04075)	--	--	AUX/IAA family	Auxin-responsive protein IAA26 OS=Arabidopsis thaliana OX=3702 GN=IAA26 PE=1 SV=2	K	Transcription	auxin-responsive protein IAA26-like isoform X2 [Quercus suber]	biological process: cellular process (GO:0009987)
EVM0022581	EVM0022581	5.44401	0.296681	0.083159	1.58812e-21	-4.91049	down	1.5318e-16	-3.6197	down	--	--	--	[MDT]	Cell wall/membrane/envelope biogenesis;; Cell cycle control, cell division, chromosome partitioning;; Signal transduction mechanisms	Molecular Function: ATP binding (GO:0005524);;	K08900|0|jcu:105650324|K08900 mitochondrial chaperone BCS1 | (RefSeq) putative cell division cycle ATPase	--	[O]	Posttranslational modification, protein turnover, chaperones	Domain associated at C-terminal with AAA;; ATPase family associated with various cellular activities (AAA)	AAA-ATPase At4g25835 OS=Arabidopsis thaliana OX=3702 GN=At4g25835 PE=2 SV=1	O	Posttranslational modification, protein turnover, chaperones	AAA-ATPase At4g25835-like [Quercus suber]	molecular function: binding (GO:0005488)
EVM0026583	EVM0026583	10.4954	25.2962	17.1118	1.25791e-09	1.4676	up	1.94443e-26	1.73732	up	0.976203	-0.202591	normal	[HC]	Coenzyme transport and metabolism;; Energy production and conversion	Cellular Component: chloroplast (GO:0009507);; Molecular Function: zeaxanthin epoxidase [overall] activity (GO:0009540);; Biological Process: abscisic acid biosynthetic process (GO:0009688);; Cellular Component: membrane (GO:0016020);; Molecular Function: zeaxanthin epoxidase activity (GO:0052662);; Molecular Function: antheraxanthin epoxidase activity (GO:0052663);; Biological Process: oxidation…	K09838|0|pper:PRUPE_ppa002248mg|K09838 zeaxanthin epoxidase [EC:1.14.15.21] | (RefSeq) hypothetical protein	Carotenoid biosynthesis (ko00906)	[CR]	Energy production and conversion;; General function prediction only	FAD binding domain;; FHA domain;; Pyridine nucleotide-disulphide oxidoreductase;; NAD(P)-binding Rossmann-like domain	Zeaxanthin epoxidase, chloroplastic OS=Prunus armeniaca OX=36596 PE=2 SV=1	CH	Energy production and conversion;; Coenzyme transport and metabolism	zeaxanthin epoxidase, chloroplastic [Quercus suber]	cellular component: cell (GO:0005623);; cellular component: organelle (GO:0043226);; cellular component: cell part (GO:0044464);; molecular function: catalytic activity (GO:0003824);; biological process: metabolic process (GO:0008152);; biological process: single-organism process (GO:0044699);; biological process: cellular process (GO:0009987);; cellular component: membrane (GO:0016020);; molecul…
EVM0001731	EVM0001731	8.52513	2.53706	1.11136	5.69838e-18	-2.08472	down	2.92413e-08	-1.2641	down	0.869885	-0.609437	normal	--	--	--	K07195|0|nnu:104590444|K07195 exocyst complex component 7 | (RefSeq) exocyst complex component EXO70A1	--	[U]	Intracellular trafficking, secretion, and vesicular transport	Exo70 exocyst complex subunit	Exocyst complex component EXO70A1 OS=Arabidopsis thaliana OX=3702 GN=EXO70A1 PE=1 SV=1	S	Function unknown	exocyst complex component EXO70A1-like [Quercus suber]	--
EVM0030946	EVM0030946	371.6	1.15972	0.0299665	2.67337e-61	-12.1527	down	1.00156e-168	-7.76456	down	0.321659	-1.44337	normal	[M]	Cell wall/membrane/envelope biogenesis	Cellular Component: extracellular region (GO:0005576);; Cellular Component: cell wall (GO:0005618);; Biological Process: plant-type cell wall organization (GO:0009664);; Cellular Component: membrane (GO:0016020);;	--	--	--	--	Pollen allergen;; Lytic transglycolase	Expansin-A8 OS=Arabidopsis thaliana OX=3702 GN=EXPA8 PE=2 SV=1	G	Carbohydrate transport and metabolism	expansin-A10-like [Quercus suber]	cellular component: extracellular region (GO:0005576);; cellular component: cell (GO:0005623);; cellular component: cell part (GO:0044464);; biological process: cellular process (GO:0009987);; biological process: cellular component organization or biogenesis (GO:0071840);; cellular component: membrane (GO:0016020)
EVM0017539	EVM0017539	4.59978	0.492659	0	6.22421e-07	-7.8254	down	3.07619e-06	-2.65735	down	--	--	--	--	--	--	K17362|2.25884e-34|vvi:100254026|K17362 acyl-coenzyme A thioesterase 13 [EC:3.1.2.-] | (RefSeq) uncharacterized LOC100254026	--	[R]	General function prediction only	--	--	Q	Secondary metabolites biosynthesis, transport and catabolism	hypothetical protein CFP56_72879 [Quercus suber]	--
EVM0012014	EVM0012014	212.609	13.9636	0.481159	2.88449e-247	-7.95563	down	7.49613e-112	-3.44811	down	5.0157e-10	-3.81205	down	[IR]	Lipid transport and metabolism;; General function prediction only	Molecular Function: hydrolase activity, acting on ester bonds (GO:0016788);;	--	--	--	--	GDSL-like Lipase/Acylhydrolase	GDSL esterase/lipase At2g04570 OS=Arabidopsis thaliana OX=3702 GN=At2g04570 PE=2 SV=1	S	Function unknown	gdsl esterase/lipase [Quercus suber]	molecular function: catalytic activity (GO:0003824)
EVM0007479	EVM0007479	23.4259	25.1343	38.4204	4.14862e-10	1.56461	up	0.00469871	0.574626	normal	0.321322	0.921314	normal	--	--	Cellular Component: peroxisome (GO:0005777);; Molecular Function: kinase activity (GO:0016301);; Biological Process: phosphorylation (GO:0016310);;	--	--	[T]	Signal transduction mechanisms	Phosphatidylinositol 3- and 4-kinase;; Ubiquitin family;; Ubiquitin-2 like Rad60 SUMO-like	Phosphatidylinositol 4-kinase gamma 3 OS=Arabidopsis thaliana OX=3702 GN=PI4KG3 PE=2 SV=1	S	Function unknown	phosphatidylinositol 4-kinase gamma 3-like [Quercus suber]	cellular component: cell (GO:0005623);; cellular component: organelle (GO:0043226);; cellular component: cell part (GO:0044464);; molecular function: catalytic activity (GO:0003824);; biological process: metabolic process (GO:0008152);; biological process: cellular process (GO:0009987)
EVM0010745	EVM0010745	21.9853	1.53963	1.72379	2.76024e-37	-2.8424	down	2.01485e-29	-3.33202	down	0.97014	0.351874	normal	--	--	Molecular Function: protein dimerization activity (GO:0046983);;	--	--	--	--	Helix-loop-helix DNA-binding domain	Transcription factor bHLH96 OS=Arabidopsis thaliana OX=3702 GN=BHLH96 PE=1 SV=1	K	Transcription	transcription factor bHLH71-like [Quercus suber]	molecular function: binding (GO:0005488)
EVM0027379	EVM0027379	1.93291	5.32355	15.6679	6.13292e-11	3.89047	up	1.7884e-05	1.89385	up	0.104726	1.61678	normal	--	--	Cellular Component: integral component of membrane (GO:0016021);;	--	--	--	--	Protein of unknown function (DUF679)	Protein DMP3 OS=Arabidopsis thaliana OX=3702 GN=DMP3 PE=2 SV=1	S	Function unknown	protein DMP3-like [Quercus suber]	cellular component: membrane (GO:0016020);; cellular component: membrane part (GO:0044425)
Castanea_mollissima_newGene_1201	--	2.08094	3.75122	5.38642	1.31114e-13	2.2014	up	0.00156664	1.29407	up	0.649455	0.784262	normal	--	--	Biological Process: para-aminobenzoic acid biosynthetic process (GO:0008153);; Cellular Component: chloroplast stroma (GO:0009570);; Molecular Function: D-alanine:2-oxoglutarate aminotransferase activity (GO:0047810);;	K18482|1.48859e-30|pper:PRUPE_ppa006695mg|K18482 4-amino-4-deoxychorismate lyase [EC:4.1.3.38] | (RefSeq) hypothetical protein	Folate biosynthesis (ko00790)	[E]	Amino acid transport and metabolism	--	D-amino-acid transaminase, chloroplastic OS=Arabidopsis thaliana OX=3702 GN=DAAT PE=1 SV=1	E	Amino acid transport and metabolism	D-amino-acid transaminase, chloroplastic isoform X2 [Prunus avium]	biological process: metabolic process (GO:0008152);; biological process: cellular process (GO:0009987);; biological process: single-organism process (GO:0044699);; cellular component: cell (GO:0005623);; cellular component: organelle (GO:0043226);; cellular component: organelle part (GO:0044422);; cellular component: cell part (GO:0044464);; molecular function: catalytic activity (GO:0003824)
EVM0028221	EVM0028221	16.1713	19.9103	28.5616	2.4146e-12	1.64251	up	0.013086	0.760553	normal	0.514023	0.808195	normal	--	--	Molecular Function: protein binding (GO:0005515);; Cellular Component: integral component of chloroplast outer membrane (GO:0031359);;	--	--	--	--	--	Outer envelope membrane protein 7 OS=Arabidopsis thaliana OX=3702 GN=OEP7 PE=1 SV=1	S	Function unknown	outer envelope membrane protein 7 [Quercus suber]	molecular function: binding (GO:0005488);; cellular component: cell (GO:0005623);; cellular component: membrane (GO:0016020);; cellular component: organelle (GO:0043226);; cellular component: organelle part (GO:0044422);; cellular component: membrane part (GO:0044425);; cellular component: cell part (GO:0044464)
EVM0002711	EVM0002711	28.9543	153.12	104.148	2.39401e-61	2.67354	up	1.87643e-84	2.86776	up	0.985492	-0.149225	normal	[O]	Posttranslational modification, protein turnover, chaperones	Molecular Function: ATP binding (GO:0005524);; Cellular Component: cytoplasm (GO:0005737);; Biological Process: ubiquitin-dependent protein catabolic process (GO:0006511);; Biological Process: protein ubiquitination (GO:0016567);; Molecular Function: ubiquitin protein ligase binding (GO:0031625);; Molecular Function: ubiquitin protein ligase activity (GO:0061630);;	K10576|1.63189e-105|pper:PRUPE_ppa012120mg|K10576 ubiquitin-conjugating enzyme E2 H [EC:2.3.2.23] | (RefSeq) hypothetical protein	Ubiquitin mediated proteolysis (ko04120)	[O]	Posttranslational modification, protein turnover, chaperones	Ubiquitin-conjugating enzyme	Ubiquitin-conjugating enzyme E2 5 OS=Arabidopsis thaliana OX=3702 GN=UBC5 PE=2 SV=2	O	Posttranslational modification, protein turnover, chaperones	ubiquitin-conjugating enzyme E2 5-like [Quercus suber]	molecular function: binding (GO:0005488);; cellular component: cell (GO:0005623);; cellular component: cell part (GO:0044464);; biological process: metabolic process (GO:0008152);; biological process: cellular process (GO:0009987);; molecular function: catalytic activity (GO:0003824)
EVM0032119	EVM0032119	27.0999	37.5474	45.9942	4.50675e-06	1.64559	up	9.08704e-12	0.941436	up	0.708398	0.650233	normal	[T]	Signal transduction mechanisms	Molecular Function: protein kinase activity (GO:0004672);; Molecular Function: ATP binding (GO:0005524);; Biological Process: protein phosphorylation (GO:0006468);; Cellular Component: integral component of membrane (GO:0016021);;	--	--	--	--	Protein tyrosine kinase;; Protein kinase domain;; Leucine rich repeat	Protein STRUBBELIG-RECEPTOR FAMILY 3 OS=Arabidopsis thaliana OX=3702 GN=SRF3 PE=2 SV=1	T	Signal transduction mechanisms	protein STRUBBELIG-RECEPTOR FAMILY 3-like [Quercus suber]	molecular function: catalytic activity (GO:0003824);; biological process: metabolic process (GO:0008152);; biological process: cellular process (GO:0009987);; molecular function: binding (GO:0005488);; cellular component: membrane (GO:0016020);; cellular component: membrane part (GO:0044425)
EVM0006002	EVM0006002	5.22837	1.47786	1.23809	1.84005e-05	-1.28423	down	0.000328911	-1.33311	down	0.995177	0.0625018	normal	[I]	Lipid transport and metabolism	Molecular Function: monooxygenase activity (GO:0004497);; Molecular Function: iron ion binding (GO:0005506);; Biological Process: fatty acid biosynthetic process (GO:0006633);; Cellular Component: integral component of membrane (GO:0016021);; Biological Process: oxidation-reduction process (GO:0055114);;	K14423|0|vvi:100255536|K14423 4,4-dimethyl-9beta,19-cyclopropylsterol-4alpha-methyl oxidase [EC:1.14.13.72] | (RefSeq) methylsterol monooxygenase 1-1	Steroid biosynthesis (ko00100)	[I]	Lipid transport and metabolism	Fatty acid hydroxylase superfamily	Methylsterol monooxygenase 1-1 OS=Arabidopsis thaliana OX=3702 GN=SMO1-1 PE=1 SV=1	I	Lipid transport and metabolism	methylsterol monooxygenase 1-1-like [Quercus suber]	molecular function: catalytic activity (GO:0003824);; biological process: metabolic process (GO:0008152);; biological process: single-organism process (GO:0044699);; molecular function: binding (GO:0005488);; biological process: cellular process (GO:0009987);; cellular component: membrane (GO:0016020);; cellular component: membrane part (GO:0044425)
EVM0002730	EVM0002730	2.24432	0.020094	0	5.2437e-08	-8.33182	down	2.687e-11	-5.69911	down	--	--	--	[M]	Cell wall/membrane/envelope biogenesis	Molecular Function: nucleotide binding (GO:0000166);; Molecular Function: protein kinase activity (GO:0004672);; Biological Process: phosphorylation (GO:0016310);; Molecular Function: ion binding (GO:0043167);;	--	--	--	--	Protein kinase domain;; Protein tyrosine kinase;; Wall-associated receptor kinase galacturonan-binding;; Calcium-binding EGF domain;; Wall-associated kinase	Wall-associated receptor kinase 5 OS=Arabidopsis thaliana OX=3702 GN=WAK5 PE=2 SV=1	T	Signal transduction mechanisms	wall-associated receptor kinase 2-like [Quercus suber]	molecular function: binding (GO:0005488);; molecular function: catalytic activity (GO:0003824);; biological process: metabolic process (GO:0008152);; biological process: cellular process (GO:0009987)
EVM0004260	EVM0004260	5.65786	0	0	7.85329e-07	-7.8136	down	1.18801e-07	-6.46994	down	--	--	--	--	--	--	--	--	--	--	Gibberellin regulated protein	Protein GAST1 OS=Solanum lycopersicum OX=4081 GN=GAST1 PE=2 SV=1	S	Function unknown	protein GAST1-like [Quercus suber]	--
EVM0003153	EVM0003153	19.2976	4.9095	4.72305	0.0488039	-1.07716	normal	0.000130292	-1.46895	down	0.964374	0.327478	normal	[M]	Cell wall/membrane/envelope biogenesis	Cellular Component: cytosol (GO:0005829);; Biological Process: pollen germination (GO:0009846);; Biological Process: pollen tube growth (GO:0009860);; Molecular Function: transferase activity (GO:0016740);;	--	--	--	--	--	Protein CDI OS=Arabidopsis thaliana OX=3702 GN=CDI PE=2 SV=1	S	Function unknown	protein CDI-like [Quercus suber]	cellular component: cell (GO:0005623);; cellular component: cell part (GO:0044464);; biological process: reproduction (GO:0000003);; biological process: reproductive process (GO:0022414);; biological process: multicellular organismal process (GO:0032501);; biological process: single-organism process (GO:0044699);; biological process: cellular process (GO:0009987);; biological process: development…
EVM0022869	EVM0022869	7.14791	43.4421	53.8948	8.22482e-28	3.76389	up	1.4886e-30	3.05217	up	0.661165	0.660827	normal	--	--	Cellular Component: integral component of membrane (GO:0016021);; Biological Process: nitrogen compound transport (GO:0071705);;	--	--	--	--	Ureide permease;; Transmembrane family, TMEM144 of transporters	Ureide permease 2 OS=Arabidopsis thaliana OX=3702 GN=UPS2 PE=1 SV=2	S	Function unknown	ureide permease 1-like isoform X1 [Quercus suber]	cellular component: membrane (GO:0016020);; cellular component: membrane part (GO:0044425);; biological process: localization (GO:0051179)
EVM0014465	EVM0014465	3.76876	0.6505	0.0486805	3.26517e-19	-5.25774	down	3.2307e-07	-2.00952	down	0.474725	-1.28235	normal	--	--	--	--	--	--	--	IQ calmodulin-binding motif	Protein IQ-DOMAIN 1 OS=Arabidopsis thaliana OX=3702 GN=IQD1 PE=1 SV=1	S	Function unknown	protein IQ-DOMAIN 1-like isoform X3 [Quercus suber]	--
EVM0014785	EVM0014785	4.12449	4.90992	2.89088	0.363116	0.358957	normal	0.0545543	0.713671	normal	0.976404	-0.261919	normal	[IQR]	Lipid transport and metabolism;; Secondary metabolites biosynthesis, transport and catabolism;; General function prediction only	--	K15095|5.20763e-119|pxb:103949231|K15095 (+)-neomenthol dehydrogenase [EC:1.1.1.208] | (RefSeq) salutaridine reductase-like	Monoterpenoid biosynthesis (ko00902)	[Q]	Secondary metabolites biosynthesis, transport and catabolism	short chain dehydrogenase;; Enoyl-(Acyl carrier protein) reductase;; KR domain;; NAD dependent epimerase/dehydratase family	Salutaridine reductase OS=Papaver bracteatum OX=215227 GN=SALR PE=1 SV=1	S	Function unknown	salutaridine reductase-like [Quercus suber]	--
EVM0018042	EVM0018042	3.91655	0.398898	0	4.46256e-08	-8.35979	down	1.60258e-09	-2.71207	down	--	--	--	--	--	--	--	--	--	--	Pollen proteins Ole e I like	--	S	Function unknown	uncharacterized protein LOC112018092 [Quercus suber]	--
EVM0012335	EVM0012335	44.5587	102.25	103.828	2.32852e-30	2.0526	up	6.13837e-26	1.6697	up	0.89066	0.380706	normal	[G]	Carbohydrate transport and metabolism	Molecular Function: alpha,alpha-trehalose-phosphate synthase (UDP-forming) activity (GO:0003825);; Molecular Function: trehalose-phosphatase activity (GO:0004805);; Biological Process: trehalose biosynthetic process (GO:0005992);; Biological Process: dephosphorylation (GO:0016311);;	K16055|0|pmum:103320959|K16055 trehalose 6-phosphate synthase/phosphatase [EC:2.4.1.15 3.1.3.12] | (RefSeq) alpha,alpha-trehalose-phosphate synthase [UDP-forming] 6	Starch and sucrose metabolism (ko00500)	[G]	Carbohydrate transport and metabolism	Glycosyltransferase family 20;; Trehalose-phosphatase;; haloacid dehalogenase-like hydrolase	Alpha,alpha-trehalose-phosphate synthase [UDP-forming] 6 OS=Arabidopsis thaliana OX=3702 GN=TPS6 PE=1 SV=2	G	Carbohydrate transport and metabolism	LOW QUALITY PROTEIN: alpha,alpha-trehalose-phosphate synthase [UDP-forming] 6-like [Quercus suber]	molecular function: catalytic activity (GO:0003824);; biological process: metabolic process (GO:0008152);; biological process: cellular process (GO:0009987);; biological process: single-organism process (GO:0044699)
EVM0010196	EVM0010196	0.593204	0	0	0.00010503	-6.53937	down	8.95004e-05	-5.19198	down	--	--	--	--	--	Molecular Function: binding (GO:0005488);;	K10406|0|tcc:TCM_034539|K10406 kinesin family member C2/C3 | (RefSeq) Di-glucose binding protein with Kinesin motor domain	--	[Z]	Cytoskeleton	Kinesin motor domain;; Microtubule binding	Kinesin-like protein KIN-14R OS=Arabidopsis thaliana OX=3702 GN=KIN14R PE=3 SV=1	Z	Cytoskeleton	kinesin-like protein KIN-14R [Quercus suber]	molecular function: binding (GO:0005488)
EVM0033288	EVM0033288	277.213	70.8135	8.98566	2.18473e-161	-4.13832	down	8.17252e-21	-1.49412	down	6.13359e-06	-2.36829	down	[G]	Carbohydrate transport and metabolism	Cellular Component: integral component of plasma membrane (GO:0005887);; Biological Process: water transport (GO:0006833);; Biological Process: cellular water homeostasis (GO:0009992);; Molecular Function: water channel activity (GO:0015250);; Molecular Function: glycerol channel activity (GO:0015254);; Biological Process: glycerol transport (GO:0015793);; Biological Process: ion transmembrane tr…	K09874|2.08257e-143|mtr:MTR_8g087720|K09874 aquaporin NIP | (RefSeq) major intrinsic protein (MIP) family transporter	--	[G]	Carbohydrate transport and metabolism	Major intrinsic protein	Aquaporin NIP1-2 OS=Arabidopsis thaliana OX=3702 GN=NIP1-2 PE=2 SV=2	G	Carbohydrate transport and metabolism	aquaporin NIP1-2-like [Quercus suber]	cellular component: cell (GO:0005623);; cellular component: membrane (GO:0016020);; cellular component: membrane part (GO:0044425);; cellular component: cell part (GO:0044464);; biological process: single-organism process (GO:0044699);; biological process: localization (GO:0051179);; biological process: cellular process (GO:0009987);; biological process: biological regulation (GO:0065007);; biolo…
EVM0020096	EVM0020096	47.2623	58.879	64.4516	3.29778e-08	1.29066	up	3.95972e-05	0.784841	up	0.823498	0.485607	normal	--	--	--	K12165|1.23117e-122|pvu:PHAVU_009G146200g|K12165 ufm1-conjugating enzyme 1 | (RefSeq) hypothetical protein	--	[S]	Function unknown	Ubiquitin-fold modifier-conjugating enzyme 1	Ubiquitin-fold modifier-conjugating enzyme 1 OS=Arabidopsis thaliana OX=3702 GN=At1g27530 PE=2 SV=1	O	Posttranslational modification, protein turnover, chaperones	PREDICTED: ubiquitin-fold modifier-conjugating enzyme 1 [Juglans regia]	--
EVM0009844	EVM0009844	36.5171	53.089	48.9148	3.99045e-08	1.25697	up	1.84967e-06	1.00449	up	0.957501	0.256842	normal	--	--	Cellular Component: plasma membrane (GO:0005886);;	--	--	--	--	cAMP-regulated phosphoprotein/endosulfine conserved region	--	S	Function unknown	hypothetical protein CFP56_15783 [Quercus suber]	cellular component: cell (GO:0005623);; cellular component: membrane (GO:0016020);; cellular component: cell part (GO:0044464)
EVM0003249	EVM0003249	9.08149	1.52599	0.929929	3.82095e-24	-2.47075	down	6.44797e-15	-2.07597	down	0.974219	-0.277793	normal	[K]	Transcription	--	--	--	[T]	Signal transduction mechanisms	NB-ARC domain;; Leucine Rich repeats (2 copies)	Putative disease resistance protein RGA3 OS=Solanum bulbocastanum OX=147425 GN=RGA3 PE=2 SV=2	S	Function unknown	putative disease resistance protein RGA1 [Quercus suber]	--
EVM0010685	EVM0010685	7.9671	0.048972	0.517091	1.82508e-23	-3.05043	down	9.36224e-18	-6.29166	down	--	--	--	--	--	Cellular Component: endoplasmic reticulum membrane (GO:0005789);;	--	--	[U]	Intracellular trafficking, secretion, and vesicular transport	MSP (Major sperm protein) domain	Vesicle-associated protein 4-2 OS=Arabidopsis thaliana OX=3702 GN=PVA42 PE=1 SV=1	U	Intracellular trafficking, secretion, and vesicular transport	Vesicle-associated membrane-protein-associated protein [Trema orientalis]	cellular component: cell (GO:0005623);; cellular component: membrane (GO:0016020);; cellular component: organelle (GO:0043226);; cellular component: organelle part (GO:0044422);; cellular component: membrane part (GO:0044425);; cellular component: cell part (GO:0044464)
EVM0010592	EVM0010592	3.16489	0.330282	0.417538	0.000480845	-2.10202	down	0.000188887	-2.60979	down	--	--	--	--	--	Molecular Function: transcription factor activity, sequence-specific DNA binding (GO:0003700);; Biological Process: regulation of transcription, DNA-templated (GO:0006355);; Molecular Function: sequence-specific DNA binding (GO:0043565);;	--	--	--	--	WRKY DNA -binding domain	Probable WRKY transcription factor 12 OS=Arabidopsis thaliana OX=3702 GN=WRKY12 PE=2 SV=1	K	Transcription	probable WRKY transcription factor 12 [Quercus suber]	molecular function: nucleic acid binding transcription factor activity (GO:0001071);; biological process: biological regulation (GO:0065007);; molecular function: binding (GO:0005488)
EVM0031910	EVM0031910	0.979157	0.111348	0.0895285	8.79932e-05	-2.43365	down	0.00111539	-2.43023	down	--	--	--	[D]	Cell cycle control, cell division, chromosome partitioning	Molecular Function: serine-type endopeptidase activity (GO:0004252);; Biological Process: proteolysis (GO:0006508);;	--	--	[R]	General function prediction only	Ankyrin repeats (3 copies);; Ankyrin repeats (many copies);; Ankyrin repeats (many copies);; Ankyrin repeat;; Ankyrin repeat	Ankyrin repeat domain-containing protein, chloroplastic OS=Arabidopsis thaliana OX=3702 GN=AKRP PE=1 SV=2	S	Function unknown	ankyrin-3-like [Quercus suber]	molecular function: catalytic activity (GO:0003824);; biological process: metabolic process (GO:0008152)
Castanea_mollissima_newGene_7403	--	3.07552	1.2194	0.708192	0.00372378	-1.25532	down	0.129255	-0.879598	normal	0.9929	-0.161507	normal	--	--	Cellular Component: ribonuclease MRP complex (GO:0000172);; Molecular Function: RNA binding (GO:0003723);; Molecular Function: ribonuclease activity (GO:0004540);; Biological Process: rRNA processing (GO:0006364);; Biological Process: mRNA cleavage (GO:0006379);; Biological Process: tRNA processing (GO:0008033);; Cellular Component: ribonuclease P complex (GO:0030677);;	K03538|7.94165e-36|jcu:105642176|K03538 ribonuclease P protein subunit POP4 [EC:3.1.26.5] | (RefSeq) ribonuclease P protein subunit p29	Ribosome biogenesis in eukaryotes (ko03008);; RNA transport (ko03013)	[A]	RNA processing and modification	--	--	J	Translation, ribosomal structure and biogenesis	ribonuclease P protein subunit p29-like isoform X1 [Quercus suber]	cellular component: cell (GO:0005623);; cellular component: macromolecular complex (GO:0032991);; cellular component: cell part (GO:0044464);; molecular function: binding (GO:0005488);; molecular function: catalytic activity (GO:0003824);; biological process: metabolic process (GO:0008152);; biological process: cellular process (GO:0009987)
EVM0014056	EVM0014056	39.9532	16.4984	9.48015	6.65392e-15	-1.24459	down	1.64105e-07	-0.800295	down	0.917274	-0.367086	normal	[L]	Replication, recombination and repair	Molecular Function: ubiquitin-protein transferase activity (GO:0004842);; Biological Process: protein ubiquitination (GO:0016567);;	--	--	[S]	Function unknown	Armadillo/beta-catenin-like repeat;; U-box domain;; Armadillo-like;; Neurochondrin	U-box domain-containing protein 13 OS=Arabidopsis thaliana OX=3702 GN=PUB13 PE=1 SV=1	S	Function unknown	U-box domain-containing protein 13-like [Quercus suber]	molecular function: catalytic activity (GO:0003824);; biological process: metabolic process (GO:0008152);; biological process: cellular process (GO:0009987)
EVM0027198	EVM0027198	133.428	30.9692	3.2206	9.62186e-95	-4.55697	down	1.02835e-13	-1.63139	down	1.19513e-05	-2.55894	down	[O]	Posttranslational modification, protein turnover, chaperones	Molecular Function: glutathione transferase activity (GO:0004364);; Cellular Component: cytoplasm (GO:0005737);; Biological Process: glutathione metabolic process (GO:0006749);; Biological Process: toxin catabolic process (GO:0009407);;	K00799|1.17976e-126|pper:PRUPE_ppa010869mg|K00799 glutathione S-transferase [EC:2.5.1.18] | (RefSeq) hypothetical protein	Glutathione metabolism (ko00480)	[O]	Posttranslational modification, protein turnover, chaperones	Glutathione S-transferase, N-terminal domain;; Glutathione S-transferase, N-terminal domain;; Glutathione S-transferase, C-terminal domain;; Glutathione S-transferase, C-terminal domain;; Glutathione S-transferase, N-terminal domain	Glutathione S-transferase U17 OS=Arabidopsis thaliana OX=3702 GN=GSTU17 PE=2 SV=1	O	Posttranslational modification, protein turnover, chaperones	glutathione S-transferase U17-like [Quercus suber]	molecular function: catalytic activity (GO:0003824);; cellular component: cell (GO:0005623);; cellular component: cell part (GO:0044464);; biological process: metabolic process (GO:0008152);; biological process: cellular process (GO:0009987);; biological process: single-organism process (GO:0044699);; biological process: response to stimulus (GO:0050896);; biological process: detoxification (GO:0…
EVM0029815	EVM0029815	8.56957	0.080705	0.0138135	4.18709e-19	-7.89532	down	6.81959e-25	-5.96941	down	--	--	--	--	--	--	--	--	--	--	IQ calmodulin-binding motif	Protein IQ-DOMAIN 1 OS=Arabidopsis thaliana OX=3702 GN=IQD1 PE=1 SV=1	S	Function unknown	protein IQ-DOMAIN 1 [Quercus suber]	--
EVM0022756	EVM0022756	0.966381	0.183492	0.11141	0.000189825	-2.21134	down	0.0105687	-1.802	normal	--	--	--	--	--	--	--	--	[L]	Replication, recombination and repair	DDE superfamily endonuclease	--	S	Function unknown	protein ALP1-like isoform X1 [Quercus suber]	--
EVM0002780	EVM0002780	18.5309	27.2826	37.4732	3.08622e-09	1.88372	up	6.28375e-10	1.02651	up	0.522366	0.790853	normal	[P]	Inorganic ion transport and metabolism	Molecular Function: molybdate ion transmembrane transporter activity (GO:0015098);; Biological Process: molybdate ion transport (GO:0015689);; Cellular Component: integral component of membrane (GO:0016021);;	--	--	--	--	Molybdate transporter of MFS superfamily;; Sulfate permease family	Molybdate transporter 2 OS=Arabidopsis thaliana OX=3702 GN=MOT2 PE=1 SV=2	P	Inorganic ion transport and metabolism	molybdate transporter 2 [Quercus suber]	molecular function: transporter activity (GO:0005215);; biological process: localization (GO:0051179);; cellular component: membrane (GO:0016020);; cellular component: membrane part (GO:0044425)
EVM0015995	EVM0015995	7.91952	0.174755	0.291751	6.87183e-21	-3.82597	down	3.87169e-26	-4.90148	down	--	--	--	[G]	Carbohydrate transport and metabolism	Molecular Function: transporter activity (GO:0005215);;	K08145|1.79648e-141|tcc:TCM_046816|K08145 MFS transporter, SP family, solute carrier family 2 (facilitated glucose transporter), member 8 | (RefSeq) Major facilitator superfamily protein	--	[R]	General function prediction only	Sugar (and other) transporter;; Major Facilitator Superfamily	Sugar transporter ERD6-like 5 OS=Arabidopsis thaliana OX=3702 GN=At1g54730 PE=2 SV=2	G	Carbohydrate transport and metabolism	sugar transporter ERD6-like 5 [Quercus suber]	molecular function: transporter activity (GO:0005215)
EVM0012930	EVM0012930	2.1467	0.613995	0.396916	9.21477e-05	-1.61069	down	0.0135372	-1.29228	normal	0.993553	-0.141769	normal	--	--	--	--	--	--	--	SAP domain	--	S	Function unknown	uncharacterized protein LOC112017611 [Quercus suber]	--
EVM0018365	EVM0018365	113.21	119.581	47.331	0.180178	-0.524407	normal	0.0310496	0.543743	normal	0.436831	-0.90222	normal	[G]	Carbohydrate transport and metabolism	Molecular Function: pectate lyase activity (GO:0030570);; Biological Process: pectin catabolic process (GO:0045490);; Molecular Function: metal ion binding (GO:0046872);;	K01728|0|gmx:100101868|K01728 pectate lyase [EC:4.2.2.2] | (RefSeq) PL2; probable pectate lyase 18	Pentose and glucuronate interconversions (ko00040)	--	--	Pectate lyase	Probable pectate lyase 5 OS=Arabidopsis thaliana OX=3702 GN=At1g67750 PE=2 SV=2	G	Carbohydrate transport and metabolism	probable pectate lyase 5 isoform X1 [Quercus suber]	molecular function: catalytic activity (GO:0003824);; biological process: metabolic process (GO:0008152);; molecular function: binding (GO:0005488)
EVM0021781	EVM0021781	2.17488	0.845045	0.540797	0.000716568	-1.20682	down	0.0526456	-0.870765	normal	0.992304	-0.176216	normal	--	--	--	--	--	--	--	--	--	--	--	--	--
EVM0026616	EVM0026616	0.243469	22.2891	360.806	1.56506e-95	11.0841	up	8.98262e-39	6.63101	up	4.53675e-13	3.8849	up	[M]	Cell wall/membrane/envelope biogenesis	--	--	--	--	--	Lytic transglycolase	EG45-like domain containing protein OS=Citrus jambhiri OX=64884 GN=CjBAp12 PE=1 SV=1	S	Function unknown	EG45-like domain containing protein [Quercus suber]	--
EVM0030341	EVM0030341	25.2942	11.9863	2.75012	9.03782e-20	-2.34695	down	0.0170406	-0.595593	normal	0.174713	-1.40947	normal	[G]	Carbohydrate transport and metabolism	Molecular Function: zinc ion binding (GO:0008270);; Molecular Function: oxidoreductase activity (GO:0016491);; Biological Process: oxidation-reduction process (GO:0055114);;	K00083|5.3597e-167|adu:107480464|K00083 cinnamyl-alcohol dehydrogenase [EC:1.1.1.195] | (RefSeq) probable cinnamyl alcohol dehydrogenase 1	Phenylpropanoid biosynthesis (ko00940)	[Q]	Secondary metabolites biosynthesis, transport and catabolism	Alcohol dehydrogenase GroES-like domain;; Zinc-binding dehydrogenase	Probable cinnamyl alcohol dehydrogenase 1 OS=Arabidopsis thaliana OX=3702 GN=CAD1 PE=2 SV=1	C	Energy production and conversion	probable cinnamyl alcohol dehydrogenase 1 isoform X2 [Quercus suber]	molecular function: binding (GO:0005488);; molecular function: catalytic activity (GO:0003824);; biological process: metabolic process (GO:0008152);; biological process: single-organism process (GO:0044699)
EVM0008217	EVM0008217	1.24348	6.13743	3.21183	7.64317e-07	2.14623	up	1.29796e-08	2.71913	up	0.858021	-0.504112	normal	[K]	Transcription	--	--	--	--	--	TIR domain;; NB-ARC domain;; Leucine rich repeat;; Leucine Rich repeats (2 copies);; TIR domain;; Leucine Rich Repeat	TMV resistance protein N OS=Nicotiana glutinosa OX=35889 GN=N PE=1 SV=1	S	Function unknown	TMV resistance protein N-like isoform X2 [Quercus suber]	--
EVM0002893	EVM0002893	5.13917	0.367049	0.015814	2.56845e-14	-6.96275	down	3.94039e-13	-3.20627	down	--	--	--	--	--	--	--	--	--	--	Plant protein of unknown function (DUF868)	--	S	Function unknown	uncharacterized protein LOC112014056 [Quercus suber]	--
EVM0001312	EVM0001312	3.51159	0.952178	0.319926	2.35858e-09	-2.58337	down	0.00521136	-1.37176	down	0.912998	-0.618166	normal	--	--	--	--	--	--	--	F-box domain;; F-box associated domain	F-box/kelch-repeat protein At3g23880 OS=Arabidopsis thaliana OX=3702 GN=At3g23880 PE=2 SV=1	S	Function unknown	F-box/kelch-repeat protein At3g23880-like [Quercus suber]	--
EVM0030742	EVM0030742	3.5329	1.71461	0.620714	0.00345046	-1.76919	down	0.19182	-0.56018	normal	0.815638	-0.79593	normal	--	--	--	--	--	--	--	No apical meristem (NAM) protein	Protein NTM1-like 9 OS=Arabidopsis thaliana OX=3702 GN=NTL9 PE=1 SV=1	S	Function unknown	protein NTM1-like 9 isoform X3 [Quercus suber]	--
EVM0012940	EVM0012940	10.8779	4.49799	1.39735	5.35987e-17	-2.17762	down	0.000181141	-0.792764	down	0.263865	-1.15529	normal	[V]	Defense mechanisms	Molecular Function: ATP binding (GO:0005524);; Cellular Component: integral component of membrane (GO:0016021);; Molecular Function: 2-alkenal reductase [NAD(P)] activity (GO:0032440);; Molecular Function: ATPase activity, coupled to transmembrane movement of substances (GO:0042626);; Biological Process: transmembrane transport (GO:0055085);; Biological Process: oxidation-reduction process (GO:00…	--	--	[Q]	Secondary metabolites biosynthesis, transport and catabolism	ABC transporter transmembrane region;; ABC transporter;; 50S ribosome-binding GTPase;; Domain of unknown function DUF87	ABC transporter C family member 12 OS=Arabidopsis thaliana OX=3702 GN=ABCC12 PE=2 SV=1	V	Defense mechanisms	ABC transporter C family member 12-like [Quercus suber]	molecular function: binding (GO:0005488);; cellular component: membrane (GO:0016020);; cellular component: membrane part (GO:0044425);; molecular function: catalytic activity (GO:0003824);; biological process: metabolic process (GO:0008152);; biological process: single-organism process (GO:0044699);; molecular function: transporter activity (GO:0005215);; biological process: localization (GO:0051…
EVM0001116	EVM0001116	6.8261	2.09008	1.07295	9.76171e-10	-1.82152	down	0.00125997	-1.21658	down	0.9705	-0.351373	normal	[HR]	Coenzyme transport and metabolism;; General function prediction only	Molecular Function: hydrolase activity (GO:0016787);;	--	--	[R]	General function prediction only	alpha/beta hydrolase fold;; Alpha/beta hydrolase family;; Serine aminopeptidase, S33;; BAAT / Acyl-CoA thioester hydrolase C terminal;; Dienelactone hydrolase family;; Phospholipase/Carboxylesterase;; TAP-like protein;; Prolyl oligopeptidase family;; X-Pro dipeptidyl-peptidase (S15 family)	--	S	Function unknown	uncharacterized protein LOC112024220 [Quercus suber]	molecular function: catalytic activity (GO:0003824)
EVM0022140	EVM0022140	105.886	34.7606	14.2531	1.3784e-30	-2.09927	down	5.85968e-10	-1.13378	down	0.356398	-0.8449	normal	--	--	--	--	--	[K]	Transcription	KOW motif;; Early transcription elongation factor of RNA pol II, NGN section	Protein RNA-directed DNA methylation 3 OS=Arabidopsis thaliana OX=3702 GN=RDM3 PE=1 SV=1	K	Transcription	protein RNA-directed DNA methylation 3 isoform X2 [Quercus suber]	--
EVM0009190	EVM0009190	14.2691	6.03291	2.68777	2.95447e-10	-1.55839	down	0.00204387	-0.757962	down	0.783477	-0.647932	normal	--	--	Molecular Function: aspartic-type endopeptidase activity (GO:0004190);; Biological Process: proteolysis (GO:0006508);; Biological Process: protein catabolic process (GO:0030163);;	--	--	[O]	Posttranslational modification, protein turnover, chaperones	Xylanase inhibitor C-terminal;; Xylanase inhibitor N-terminal;; Eukaryotic aspartyl protease	Aspartyl protease 37 OS=Oryza sativa subsp. japonica OX=39947 GN=AP37 PE=3 SV=2	O	Posttranslational modification, protein turnover, chaperones	probable aspartyl protease At4g16563 [Quercus suber]	molecular function: catalytic activity (GO:0003824);; biological process: metabolic process (GO:0008152)
EVM0001193	EVM0001193	1.61073	1.83906	1.58087	0.0242816	0.748996	normal	0.142771	0.651682	normal	0.994485	0.100016	normal	--	--	--	--	--	--	--	Protein of unknown function (DUF1668);; Kelch motif	--	--	--	uncharacterized protein LOC111994501 [Quercus suber]	--
EVM0023235	EVM0023235	25.2081	10.1412	6.67648	6.15861e-07	-1.08708	down	0.00115345	-0.834909	down	0.988767	-0.176891	normal	--	--	--	--	--	--	--	--	Uncharacterized protein At4g22160 OS=Arabidopsis thaliana OX=3702 GN=At4g22160 PE=2 SV=2	S	Function unknown	uncharacterized protein At4g22160 [Quercus suber]	--
EVM0025528	EVM0025528	2.98137	5.61228	7.95189	4.88392e-12	2.26061	up	0.00077747	1.36054	up	0.701692	0.763204	normal	--	--	--	--	--	--	--	--	--	S	Function unknown	uncharacterized protein LOC111996250 [Quercus suber]	--
EVM0018190	EVM0018190	4.90324	0	0	5.10287e-07	-7.92735	down	7.22062e-08	-6.56354	down	--	--	--	[TK]	Signal transduction mechanisms;; Transcription	--	K14492|3.70176e-55|pmum:103319806|K14492 two-component response regulator ARR-A family | (RefSeq) two-component response regulator ORR9-like	Plant hormone signal transduction (ko04075)	[K]	Transcription	Response regulator receiver domain	Two-component response regulator ARR9 OS=Arabidopsis thaliana OX=3702 GN=ARR9 PE=1 SV=1	K	Transcription	two-component response regulator ORR9-like [Quercus suber]	--
Castanea_mollissima_newGene_4949	--	9.50027	4.16108	2.26975	0.00021009	-1.35466	down	0.0285896	-0.791349	normal	0.932152	-0.424619	normal	--	--	--	--	--	[I]	Lipid transport and metabolism	--	3-ketoacyl-CoA thiolase 2, peroxisomal OS=Arabidopsis thaliana OX=3702 GN=PED1 PE=1 SV=2	--	--	uncharacterized protein LOC112031456 [Quercus suber]	--
EVM0020067	EVM0020067	10.7632	30.0426	31.212	9.17005e-24	2.36867	up	1.18391e-15	1.93785	up	0.894914	0.410319	normal	[C]	Energy production and conversion	Cellular Component: mitochondrion (GO:0005739);; Biological Process: leucine catabolic process (GO:0006552);; Molecular Function: electron carrier activity (GO:0009055);; Biological Process: chlorophyll catabolic process (GO:0015996);;	K03521|6.11711e-165|nnu:104610039|K03521 electron transfer flavoprotein beta subunit | (RefSeq) electron transfer flavoprotein subunit beta, mitochondrial-like	--	[C]	Energy production and conversion	Electron transfer flavoprotein domain	Electron transfer flavoprotein subunit beta, mitochondrial OS=Arabidopsis thaliana OX=3702 GN=ETFB PE=1 SV=1	C	Energy production and conversion	electron transfer flavoprotein subunit beta, mitochondrial-like [Quercus suber]	cellular component: cell (GO:0005623);; cellular component: organelle (GO:0043226);; cellular component: cell part (GO:0044464);; biological process: metabolic process (GO:0008152);; biological process: cellular process (GO:0009987);; biological process: single-organism process (GO:0044699);; molecular function: electron carrier activity (GO:0009055)
EVM0014330	EVM0014330	20.2111	8.59634	5.26654	1.81354e-09	-1.15441	down	2.16891e-05	-0.758519	down	0.95058	-0.312585	normal	[R]	General function prediction only	Cellular Component: nucleus (GO:0005634);; Cellular Component: cytosol (GO:0005829);; Biological Process: regulation of transcription, DNA-templated (GO:0006355);; Molecular Function: histone-arginine N-methyltransferase activity (GO:0008469);; Biological Process: regulation of flower development (GO:0009909);; Biological Process: positive regulation of vernalization response (GO:0010220);; Molec…	K02516|0|vvi:100242249|K02516 type II protein arginine methyltransferase [EC:2.1.1.320] | (RefSeq) protein arginine N-methyltransferase 1.5	RNA transport (ko03013)	[D]	Cell cycle control, cell division, chromosome partitioning	PRMT5 arginine-N-methyltransferase;; PRMT5 oligomerisation domain;; PRMT5 TIM barrel domain	Protein arginine N-methyltransferase 1.5 OS=Arabidopsis thaliana OX=3702 GN=PMRT15 PE=1 SV=2	S	Function unknown	protein arginine n-methyltransferase 1.5 [Quercus suber]	cellular component: cell (GO:0005623);; cellular component: organelle (GO:0043226);; cellular component: cell part (GO:0044464);; biological process: biological regulation (GO:0065007);; molecular function: catalytic activity (GO:0003824);; biological process: metabolic process (GO:0008152);; biological process: cellular process (GO:0009987);; biological process: cellular component organization o…
EVM0016961	EVM0016961	62.1058	0.224717	0	2.03911e-18	-11.6818	down	1.47062e-69	-7.40114	down	--	--	--	[R]	General function prediction only	Cellular Component: membrane (GO:0016020);;	--	--	[Q]	Secondary metabolites biosynthesis, transport and catabolism	short chain dehydrogenase;; Enoyl-(Acyl carrier protein) reductase;; KR domain	11-beta-hydroxysteroid dehydrogenase-like 6 OS=Arabidopsis thaliana OX=3702 GN=HSD6 PE=2 SV=1	S	Function unknown	11-beta-hydroxysteroid dehydrogenase 1B-like [Quercus suber]	cellular component: membrane (GO:0016020)
EVM0023919	EVM0023919	19.5204	45.2233	31.5389	2.42048e-11	1.50416	up	2.66551e-11	1.67885	up	0.990101	-0.131334	normal	--	--	Molecular Function: protein tyrosine phosphatase activity (GO:0004725);; Biological Process: peptidyl-tyrosine dephosphorylation (GO:0035335);;	--	--	[I]	Lipid transport and metabolism	CRAL/TRIO domain	--	S	Function unknown	CRAL-TRIO domain-containing protein YKL091C [Quercus suber]	molecular function: catalytic activity (GO:0003824);; biological process: metabolic process (GO:0008152);; biological process: cellular process (GO:0009987)
EVM0008923	EVM0008923	101.624	27.0091	6.88963	1.42464e-67	-3.08514	down	7.35974e-22	-1.43577	down	0.0943123	-1.40071	normal	--	--	Cellular Component: plasma membrane (GO:0005886);; Cellular Component: integral component of membrane (GO:0016021);;	--	--	--	--	Domain of unknown function (DUF588)	CASP-like protein 2A1 OS=Populus trichocarpa OX=3694 GN=POPTRDRAFT_834139 PE=3 SV=1	S	Function unknown	CASP-like protein 2A1 [Quercus suber]	cellular component: cell (GO:0005623);; cellular component: membrane (GO:0016020);; cellular component: cell part (GO:0044464);; cellular component: membrane part (GO:0044425)
EVM0033237	EVM0033237	17.8795	26.1283	26.2398	2.93466e-08	1.39666	up	6.57711e-06	1.0117	up	0.918246	0.370628	normal	[R]	General function prediction only	Molecular Function: GTP binding (GO:0005525);; Cellular Component: endosome (GO:0005768);; Biological Process: small GTPase mediated signal transduction (GO:0007264);;	K07904|4.37495e-134|pda:103705373|K07904 Ras-related protein Rab-11A | (RefSeq) ras-related protein RGP1	Endocytosis (ko04144)	[U]	Intracellular trafficking, secretion, and vesicular transport	Ras family;; Ras of Complex, Roc, domain of DAPkinase;; ADP-ribosylation factor family;; 50S ribosome-binding GTPase	Ras-related protein RGP1 OS=Oryza sativa subsp. japonica OX=39947 GN=RGP1 PE=2 SV=2	S	Function unknown	ras-related protein RGP1-like [Quercus suber]	molecular function: binding (GO:0005488);; cellular component: cell (GO:0005623);; cellular component: organelle (GO:0043226);; cellular component: cell part (GO:0044464);; biological process: cellular process (GO:0009987);; biological process: signaling (GO:0023052);; biological process: single-organism process (GO:0044699);; biological process: response to stimulus (GO:0050896);; biological pro…
EVM0029232	EVM0029232	54.7378	146.699	183.849	5.26415e-13	2.621	up	1.05933e-27	1.88712	up	0.691665	0.675745	normal	--	--	--	--	--	[R]	General function prediction only	Yippee zinc-binding/DNA-binding /Mis18, centromere assembly	Protein yippee-like OS=Solanum tuberosum OX=4113 PE=2 SV=1	S	Function unknown	protein yippee-like isoform X1 [Quercus suber]	--
EVM0028390	EVM0028390	0.465648	1.00279	6.26364	6.29078e-11	4.54256	up	0.0726213	1.45565	normal	0.012919	2.26946	normal	[OT]	Posttranslational modification, protein turnover, chaperones;; Signal transduction mechanisms	Biological Process: metabolic process (GO:0008152);; Molecular Function: amino acid binding (GO:0016597);;	--	--	--	--	ACT domain;; ACT domain;; ACT domain	ACT domain-containing protein ACR1 OS=Arabidopsis thaliana OX=3702 GN=ACR1 PE=2 SV=1	S	Function unknown	hypothetical protein POPTR_007G006500v3 [Populus trichocarpa]	biological process: metabolic process (GO:0008152);; molecular function: binding (GO:0005488)
Castanea_mollissima_newGene_2862	--	0.127448	1.7902	4.0236	5.68415e-18	5.53647	up	6.55368e-06	3.69729	up	0.206957	1.37234	normal	[T]	Signal transduction mechanisms	Molecular Function: protein serine/threonine kinase activity (GO:0004674);; Molecular Function: ATP binding (GO:0005524);; Cellular Component: plasma membrane (GO:0005886);; Biological Process: protein phosphorylation (GO:0006468);; Cellular Component: plasmodesma (GO:0009506);; Cellular Component: integral component of membrane (GO:0016021);; Molecular Function: ubiquitin protein ligase binding …	--	--	--	--	D-mannose binding lectin;; S-locus glycoprotein domain;; Protein tyrosine kinase;; Protein kinase domain	G-type lectin S-receptor-like serine/threonine-protein kinase At1g11330 OS=Arabidopsis thaliana OX=3702 GN=At1g11330 PE=1 SV=3	--	--	g-type lectin s-receptor-like serine/threonine-protein kinase [Quercus suber]	molecular function: catalytic activity (GO:0003824);; biological process: metabolic process (GO:0008152);; biological process: cellular process (GO:0009987);; molecular function: binding (GO:0005488);; cellular component: cell (GO:0005623);; cellular component: membrane (GO:0016020);; cellular component: cell part (GO:0044464);; cellular component: cell junction (GO:0030054);; cellular component:…
EVM0000517	EVM0000517	74.3347	14.2255	4.63652	2.45994e-32	-3.22567	down	3.0395e-33	-1.90529	down	0.321285	-1.09814	normal	--	--	Molecular Function: 3-hydroxyisobutyryl-CoA hydrolase activity (GO:0003860);; Molecular Function: signal transducer activity (GO:0004871);; Biological Process: signal transduction (GO:0007165);; Biological Process: animal organ development (GO:0048513);; Biological Process: auxin transport (GO:0060918);;	--	--	--	--	NPH3 family;; BTB/POZ domain	BTB/POZ domain-containing protein NPY1 OS=Arabidopsis thaliana OX=3702 GN=NPY1 PE=2 SV=1	S	Function unknown	BTB/POZ domain-containing protein NPY1 [Quercus suber]	molecular function: catalytic activity (GO:0003824);; molecular function: signal transducer activity (GO:0004871);; biological process: cellular process (GO:0009987);; biological process: biological regulation (GO:0065007);; biological process: developmental process (GO:0032502);; biological process: single-organism process (GO:0044699);; biological process: localization (GO:0051179)
EVM0007462	EVM0007462	12.2612	1.66255	1.78848	0.000908546	-1.80367	down	3.42217e-18	-2.38187	down	0.939355	0.445062	normal	[V]	Defense mechanisms	--	K05658|0|tcc:TCM_029573|K05658 ATP-binding cassette, subfamily B (MDR/TAP), member 1 [EC:3.6.3.44] | (RefSeq) P-glycoprotein 9 isoform 1	ABC transporters (ko02010)	[Q]	Secondary metabolites biosynthesis, transport and catabolism	ABC transporter transmembrane region;; ABC transporter;; ABC transporter	ABC transporter B family member 9 OS=Arabidopsis thaliana OX=3702 GN=ABCB9 PE=3 SV=2	V	Defense mechanisms	LOW QUALITY PROTEIN: ABC transporter B family member 9-like [Quercus suber]	--
EVM0014327	EVM0014327	10.452	1.37914	0.545898	3.64039e-30	-3.40283	down	2.35577e-14	-2.40865	down	0.910252	-0.608305	normal	--	--	Cellular Component: integral component of membrane (GO:0016021);;	--	--	[S]	Function unknown	Vitamin B6 photo-protection and homoeostasis	Protein root UVB sensitive 3 OS=Arabidopsis thaliana OX=3702 GN=RUS3 PE=2 SV=1	S	Function unknown	protein root UVB sensitive 3-like isoform X1 [Quercus suber]	cellular component: membrane (GO:0016020);; cellular component: membrane part (GO:0044425)
EVM0015307	EVM0015307	0.54068	1.22615	1.15303	0.000921985	1.94614	up	0.0485047	1.55285	normal	0.990101	0.22121	normal	--	--	Cellular Component: cytoplasm (GO:0005737);; Biological Process: metal ion transport (GO:0030001);; Molecular Function: transition metal ion binding (GO:0046914);; Biological Process: cellular transition metal ion homeostasis (GO:0046916);;	--	--	[P]	Inorganic ion transport and metabolism	Heavy-metal-associated domain	Heavy metal-associated isoprenylated plant protein 23 OS=Arabidopsis thaliana OX=3702 GN=HIPP23 PE=1 SV=1	S	Function unknown	leucine-rich repeat extensin-like protein 3 [Quercus suber]	cellular component: cell (GO:0005623);; cellular component: cell part (GO:0044464);; biological process: localization (GO:0051179);; molecular function: binding (GO:0005488);; biological process: cellular process (GO:0009987);; biological process: single-organism process (GO:0044699);; biological process: biological regulation (GO:0065007)
EVM0004567	EVM0004567	3.26729	0.194369	0	2.05706e-07	-8.07666	down	7.34535e-08	-3.33995	down	--	--	--	--	--	--	--	--	--	--	--	--	S	Function unknown	uncharacterized protein LOC112035814 [Quercus suber]	--
EVM0000426	EVM0000426	13.9982	4.51667	1.89744	2.16301e-11	-2.11628	down	2.46894e-07	-1.15371	down	0.81498	-0.715493	normal	[I]	Lipid transport and metabolism	Molecular Function: hydrolase activity (GO:0016787);;	--	--	--	--	Alpha/beta hydrolase family;; alpha/beta hydrolase fold;; Serine aminopeptidase, S33	--	S	Function unknown	uncharacterized protein LOC111999538 [Quercus suber]	molecular function: catalytic activity (GO:0003824)
EVM0032610	EVM0032610	1.69219	0.019294	0.013501	6.10532e-09	-5.58659	down	1.2032e-07	-4.81166	down	--	--	--	[QV]	Secondary metabolites biosynthesis, transport and catabolism;; Defense mechanisms	--	--	--	[Q]	Secondary metabolites biosynthesis, transport and catabolism	Cytochrome P450;; Cytochrome P450	Flavonoid 3&apos;-monooxygenase OS=Arabidopsis thaliana OX=3702 GN=CYP75B1 PE=1 SV=1	Q	Secondary metabolites biosynthesis, transport and catabolism	geraniol 8-hydroxylase-like [Quercus suber]	--
EVM0025831	EVM0025831	3.25512	0.053587	0.088314	7.25438e-07	-3.97473	down	1.38699e-06	-4.74945	down	--	--	--	--	--	--	--	--	--	--	Domain of unknown function (DUF4228)	--	S	Function unknown	uncharacterized protein LOC112006845 [Quercus suber]	--
Castanea_mollissima_newGene_6990	--	0.114548	2.39224	2.08409	1.74193e-06	4.49878	up	0.00141099	3.8752	up	0.995111	0.0937509	normal	--	--	--	--	--	--	--	--	--	--	--	hypothetical protein CFP56_29201 [Quercus suber]	--
EVM0027236	EVM0027236	14.5163	19.6835	27.5064	1.07705e-09	1.78389	up	3.44508e-07	0.908571	up	0.476125	0.810989	normal	[J]	Translation, ribosomal structure and biogenesis	Molecular Function: nucleotide binding (GO:0000166);; Molecular Function: nucleic acid binding (GO:0003676);; Cellular Component: viral nucleocapsid (GO:0019013);; Cellular Component: intracellular ribonucleoprotein complex (GO:0030529);;	K14411|0|rcu:8277575|K14411 RNA-binding protein Musashi | (RefSeq) heterogeneous nuclear ribonucleoprotein 1	mRNA surveillance pathway (ko03015)	[A]	RNA processing and modification	RNA recognition motif. (a.k.a. RRM, RBD, or RNP domain);; RNA recognition motif;; Nup53/35/40-type RNA recognition motif	Heterogeneous nuclear ribonucleoprotein 1 OS=Arabidopsis thaliana OX=3702 GN=RNP1 PE=1 SV=1	S	Function unknown	heterogeneous nuclear ribonucleoprotein 1-like [Quercus suber]	molecular function: binding (GO:0005488);; cellular component: virion (GO:0019012);; cellular component: virion part (GO:0044423);; cellular component: cell (GO:0005623);; cellular component: macromolecular complex (GO:0032991);; cellular component: cell part (GO:0044464)
EVM0019718	EVM0019718	5.20922	0.572463	0.210277	3.72727e-21	-3.69185	down	1.60704e-11	-2.65269	down	0.95754	-0.433343	normal	[E]	Amino acid transport and metabolism	Molecular Function: catalytic activity (GO:0003824);;	--	--	[E]	Amino acid transport and metabolism	Aminotransferase class-V	Probable L-cysteine desulfhydrase, chloroplastic OS=Arabidopsis thaliana OX=3702 GN=CpNIFS3 PE=1 SV=1	E	Amino acid transport and metabolism	probable L-cysteine desulfhydrase, chloroplastic [Quercus suber]	molecular function: catalytic activity (GO:0003824)
EVM0031193	EVM0031193	384.707	81.3075	31.9659	6.59013e-54	-2.80332	down	4.04665e-48	-1.76679	down	0.338062	-0.900875	normal	--	--	--	--	--	--	--	--	--	--	--	nucleolin-like isoform X1 [Quercus suber]	--
EVM0015164	EVM0015164	2.22097	0.317282	0.0196585	6.68488e-14	-5.55755	down	4.04541e-07	-2.25566	down	--	--	--	--	--	--	--	--	--	--	Domain of unknown function (DUF4220);; Protein of unknown function, DUF594	--	S	Function unknown	uncharacterized protein LOC112007437 [Quercus suber]	--
EVM0001547	EVM0001547	4.55311	0.591313	0.282251	2.68955e-15	-3.18181	down	5.55438e-09	-2.40816	down	0.972748	-0.352779	normal	--	--	--	K17275|0|pop:POPTR_0001s37110g|K17275 plastin-1 | (RefSeq) POPTRDRAFT_753220; hypothetical protein	--	[Z]	Cytoskeleton	Calponin homology (CH) domain	Fimbrin-1 OS=Arabidopsis thaliana OX=3702 GN=FIM1 PE=1 SV=2	Z	Cytoskeleton	fimbrin-1-like [Quercus suber]	--
Castanea_mollissima_newGene_6244	--	1.46618	0.216736	0.369065	0.000361107	-1.36868	down	2.36534e-06	-2.12645	down	0.938524	0.507965	normal	--	--	--	--	--	--	--	--	--	--	--	--	--
EVM0011901	EVM0011901	12.571	0	0	9.56534e-10	-9.06916	down	5.98368e-12	-7.76577	down	--	--	--	--	--	--	--	--	--	--	ZF-HD protein dimerisation region	Zinc-finger homeodomain protein 4 OS=Arabidopsis thaliana OX=3702 GN=ZHD4 PE=1 SV=1	S	Function unknown	zinc-finger homeodomain protein 10-like [Quercus suber]	--
EVM0006294	EVM0006294	0.714901	6.01896	6.36905	2.63591e-16	3.88879	up	7.35806e-08	3.38501	up	0.936044	0.378893	normal	[V]	Defense mechanisms	Biological Process: drug transmembrane transport (GO:0006855);; Molecular Function: drug transmembrane transporter activity (GO:0015238);; Molecular Function: antiporter activity (GO:0015297);; Cellular Component: integral component of membrane (GO:0016021);;	K03327|0|pper:PRUPE_ppa004837mg|K03327 multidrug resistance protein, MATE family | (RefSeq) hypothetical protein	--	[R]	General function prediction only	MatE	Protein DETOXIFICATION 16 OS=Arabidopsis thaliana OX=3702 GN=DTX16 PE=2 SV=1	V	Defense mechanisms	protein DETOXIFICATION 16-like [Quercus suber]	biological process: single-organism process (GO:0044699);; biological process: response to stimulus (GO:0050896);; biological process: localization (GO:0051179);; molecular function: transporter activity (GO:0005215);; cellular component: membrane (GO:0016020);; cellular component: membrane part (GO:0044425)
EVM0008501	EVM0008501	19.6079	20.8036	12.2088	0.694914	0.0936919	normal	0.00756429	0.55398	normal	0.924587	-0.371625	normal	[O]	Posttranslational modification, protein turnover, chaperones	Molecular Function: copper ion binding (GO:0005507);; Molecular Function: ATP binding (GO:0005524);; Cellular Component: mitochondrion (GO:0005739);; Biological Process: protein folding (GO:0006457);; Cellular Component: chloroplast thylakoid membrane (GO:0009535);; Cellular Component: chloroplast stroma (GO:0009570);; Cellular Component: chloroplast envelope (GO:0009941);; Cellular Component: ap…	K04078|5.27013e-143|jcu:105638002|K04078 chaperonin GroES | (RefSeq) 20 kDa chaperonin, chloroplastic	--	[O]	Posttranslational modification, protein turnover, chaperones	Chaperonin 10 Kd subunit	20 kDa chaperonin, chloroplastic OS=Arabidopsis thaliana OX=3702 GN=CPN20 PE=1 SV=2	O	Posttranslational modification, protein turnover, chaperones	20 kda chaperonin, chloroplastic [Quercus suber]	molecular function: binding (GO:0005488);; cellular component: cell (GO:0005623);; cellular component: organelle (GO:0043226);; cellular component: cell part (GO:0044464);; biological process: cellular process (GO:0009987);; cellular component: membrane (GO:0016020);; cellular component: organelle part (GO:0044422);; cellular component: extracellular region (GO:0005576);; biological process: biol…
EVM0025798	EVM0025798	2.65837	0.62268	0.201886	3.01568e-17	-2.85574	down	1.37883e-05	-1.58878	down	0.862634	-0.739628	normal	--	--	--	--	--	[T]	Signal transduction mechanisms	NB-ARC domain;; Leucine Rich repeats (2 copies)	Putative disease resistance protein RGA3 OS=Solanum bulbocastanum OX=147425 GN=RGA3 PE=2 SV=2	S	Function unknown	putative disease resistance protein RGA3 [Quercus suber]	--
EVM0028374	EVM0028374	6.28173	1.44418	0.208314	1.77711e-27	-4.01526	down	9.87239e-07	-1.62057	down	0.421488	-1.38067	normal	[IR]	Lipid transport and metabolism;; General function prediction only	Cellular Component: integral component of membrane (GO:0016021);; Molecular Function: hydrolase activity, acting on ester bonds (GO:0016788);;	--	--	--	--	GDSL-like Lipase/Acylhydrolase	GDSL esterase/lipase At5g14450 OS=Arabidopsis thaliana OX=3702 GN=At5g14450 PE=2 SV=1	S	Function unknown	GDSL esterase/lipase At3g27950-like isoform X1 [Quercus suber]	cellular component: membrane (GO:0016020);; cellular component: membrane part (GO:0044425);; molecular function: catalytic activity (GO:0003824)
Castanea_mollissima_newGene_4413	--	10.2607	12.27	13.7101	1.90989e-05	1.25223	up	0.0950666	0.713487	normal	0.928352	0.451353	normal	--	--	--	--	--	--	--	--	--	--	--	--	--
EVM0024520	EVM0024520	29.2443	7.25573	2.02256	1.03988e-11	-2.98736	down	0.00141226	-1.49758	down	0.514023	-1.09843	normal	--	--	--	--	--	--	--	Protein of unknown function (DUF1138)	--	S	Function unknown	uncharacterized protein LOC112027938 [Quercus suber]	--
EVM0023618	EVM0023618	2.40163	16.5182	16.6912	1.21387e-43	3.60465	up	3.23907e-25	3.21084	up	0.914676	0.366707	normal	--	--	Cellular Component: Golgi membrane (GO:0000139);; Biological Process: protein glycosylation (GO:0006486);; Molecular Function: galactosyltransferase activity (GO:0008378);; Cellular Component: integral component of membrane (GO:0016021);;	K20855|0|pmum:103332943|K20855 beta-1,3-galactosyltransferase 1/2/3/4/5/7/8 [EC:2.4.1.-] | (RefSeq) beta-1,3-galactosyltransferase 7	--	[G]	Carbohydrate transport and metabolism	Galactosyltransferase;; Domain of unknown function (DUF4094)	Beta-1,3-galactosyltransferase 7 OS=Arabidopsis thaliana OX=3702 GN=B3GALT7 PE=2 SV=1	S	Function unknown	beta-1,3-galactosyltransferase 7 isoform X1 [Quercus suber]	cellular component: cell (GO:0005623);; cellular component: membrane (GO:0016020);; cellular component: organelle (GO:0043226);; cellular component: organelle part (GO:0044422);; cellular component: cell part (GO:0044464);; biological process: metabolic process (GO:0008152);; biological process: cellular process (GO:0009987);; biological process: single-organism process (GO:0044699);; molecular f…
Castanea_mollissima_newGene_438	--	2.30468	0.444178	0.120165	9.72547e-08	-3.39511	down	0.00478319	-1.79304	down	--	--	--	--	--	--	--	--	--	--	--	--	--	--	hypothetical protein CFP56_72214 [Quercus suber]	--
EVM0005085	EVM0005085	2.02824	0.294621	0	2.72568e-06	-7.49872	down	0.000519443	-2.20664	down	--	--	--	--	--	--	--	--	[S]	Function unknown	PPPDE putative peptidase domain	DeSI-like protein At4g17486 OS=Arabidopsis thaliana OX=3702 GN=At4g17486 PE=2 SV=1	S	Function unknown	deSI-like protein At4g17486 isoform X1 [Quercus suber]	--
EVM0027218	EVM0027218	1.60821	0.498906	0.102893	9.44266e-07	-3.04309	down	0.0358965	-1.17704	normal	0.847321	-0.758864	normal	--	--	--	--	--	[R]	General function prediction only	PPR repeat family;; PPR repeat;; PPR repeat;; Pentatricopeptide repeat domain;; Pentacotripeptide-repeat region of PRORP	Pentatricopeptide repeat-containing protein At2g13600 OS=Arabidopsis thaliana OX=3702 GN=PCMP-E76 PE=3 SV=1	S	Function unknown	pentatricopeptide repeat-containing protein At2g13600-like [Quercus suber]	--
EVM0018530	EVM0018530	7.10592	1.52506	0.253059	2.05659e-16	-3.84038	down	7.45699e-05	-1.69595	down	0.731034	-0.973994	normal	--	--	Biological Process: response to oxidative stress (GO:0006979);; Cellular Component: chloroplast thylakoid membrane (GO:0009535);; Cellular Component: thylakoid lumen (GO:0031977);;	--	--	[M]	Cell wall/membrane/envelope biogenesis	Lipocalin-like domain;; Lipocalin / cytosolic fatty-acid binding protein family	Chloroplastic lipocalin OS=Arabidopsis thaliana OX=3702 GN=CHL PE=1 SV=1	M	Cell wall/membrane/envelope biogenesis	chloroplastic lipocalin isoform X2 [Quercus suber]	biological process: response to stimulus (GO:0050896);; cellular component: cell (GO:0005623);; cellular component: membrane (GO:0016020);; cellular component: organelle (GO:0043226);; cellular component: organelle part (GO:0044422);; cellular component: cell part (GO:0044464)
EVM0016853	EVM0016853	5.89315	24.9778	35.3136	4.611e-46	3.41788	up	7.21114e-30	2.54017	up	0.427001	0.818023	normal	--	--	Molecular Function: transporter activity (GO:0005215);; Biological Process: transport (GO:0006810);; Cellular Component: integral component of membrane (GO:0016021);;	--	--	--	--	Purine nucleobase transmembrane transport	Probable purine permease 11 OS=Arabidopsis thaliana OX=3702 GN=PUP11 PE=1 SV=1	S	Function unknown	probable purine permease 11 [Quercus suber]	molecular function: transporter activity (GO:0005215);; biological process: localization (GO:0051179);; cellular component: membrane (GO:0016020);; cellular component: membrane part (GO:0044425)
EVM0003334	EVM0003334	1.5645	5.62666	3.43077	0.000152552	1.87687	up	2.90612e-05	2.25427	up	0.95754	-0.317931	normal	[T]	Signal transduction mechanisms	Cellular Component: membrane (GO:0016020);;	--	--	--	--	Protein tyrosine kinase;; D-mannose binding lectin;; Protein kinase domain;; Domain of unknown function (DUF3403);; PAN-like domain	G-type lectin S-receptor-like serine/threonine-protein kinase B120 OS=Arabidopsis thaliana OX=3702 GN=B120 PE=2 SV=1	--	--	G-type lectin S-receptor-like serine/threonine-protein kinase B120 [Quercus suber]	cellular component: membrane (GO:0016020)
EVM0029565	EVM0029565	1.15712	21.3633	45.4978	4.71303e-23	6.06534	up	3.28376e-05	4.17893	up	0.104436	1.34039	normal	--	--	--	--	--	[GC]	Carbohydrate transport and metabolism;; Energy production and conversion	UDP-glucoronosyl and UDP-glucosyl transferase	UDP-glycosyltransferase 89B1 OS=Arabidopsis thaliana OX=3702 GN=UGT89B1 PE=2 SV=2	S	Function unknown	UDP-glycosyltransferase 89B1-like [Quercus suber]	--
EVM0023585	EVM0023585	20.16	21.5312	22.5827	0.000665141	1.02419	up	0.0128888	0.563007	normal	0.894914	0.433651	normal	--	--	Biological Process: ubiquitin-dependent protein catabolic process (GO:0006511);; Biological Process: protein ubiquitination (GO:0016567);;	--	--	[O]	Posttranslational modification, protein turnover, chaperones	--	--	O	Posttranslational modification, protein turnover, chaperones	uncharacterized protein LOC111988925 isoform X3 [Quercus suber]	biological process: metabolic process (GO:0008152);; biological process: cellular process (GO:0009987)
EVM0022561	EVM0022561	16.3314	41.8652	20.1221	1.94569e-06	1.12212	up	1.33624e-12	1.82404	up	0.690192	-0.610344	normal	[O]	Posttranslational modification, protein turnover, chaperones	Molecular Function: glutathione transferase activity (GO:0004364);; Cellular Component: cytoplasm (GO:0005737);; Biological Process: glutathione metabolic process (GO:0006749);; Biological Process: toxin catabolic process (GO:0009407);;	K00799|5.22866e-106|vvi:100260235|K00799 glutathione S-transferase [EC:2.5.1.18] | (RefSeq) glutathione S-transferase U10-like	Glutathione metabolism (ko00480)	[O]	Posttranslational modification, protein turnover, chaperones	Glutathione S-transferase, N-terminal domain;; Glutathione S-transferase, N-terminal domain;; Glutathione S-transferase, N-terminal domain	Glutathione S-transferase U10 OS=Arabidopsis thaliana OX=3702 GN=GSTU10 PE=2 SV=1	O	Posttranslational modification, protein turnover, chaperones	glutathione S-transferase U10-like [Quercus suber]	molecular function: catalytic activity (GO:0003824);; cellular component: cell (GO:0005623);; cellular component: cell part (GO:0044464);; biological process: metabolic process (GO:0008152);; biological process: cellular process (GO:0009987);; biological process: single-organism process (GO:0044699);; biological process: response to stimulus (GO:0050896);; biological process: detoxification (GO:0…
EVM0008413	EVM0008413	0.698179	2.67394	2.81241	1.71092e-07	2.87769	up	8.87318e-08	2.35121	up	0.936044	0.431377	normal	--	--	--	--	--	--	--	Domain of unknown function (DUF4378);; Protein of unknown function (DUF3741)	Protein TRM32 OS=Arabidopsis thaliana OX=3702 GN=TRM32 PE=2 SV=1	S	Function unknown	uncharacterized protein LOC112005430 [Quercus suber]	--
EVM0029961	EVM0029961	5.93585	19.2486	18.6256	5.56111e-21	2.426	up	2.29619e-14	2.15112	up	0.954573	0.275372	normal	[FE]	Nucleotide transport and metabolism;; Amino acid transport and metabolism	Molecular Function: magnesium ion binding (GO:0000287);; Molecular Function: ribose phosphate diphosphokinase activity (GO:0004749);; Biological Process: ribonucleoside monophosphate biosynthetic process (GO:0009156);; Biological Process: nucleotide biosynthetic process (GO:0009165);; Molecular Function: transferase activity, transferring glycosyl groups (GO:0016757);;	K00948|0|tcc:TCM_015773|K00948 ribose-phosphate pyrophosphokinase [EC:2.7.6.1] | (RefSeq) Phosphoribosyltransferase family protein	Pentose phosphate pathway (ko00030);; Purine metabolism (ko00230);; Carbon metabolism (ko01200);; Biosynthesis of amino acids (ko01230)	[FE]	Nucleotide transport and metabolism;; Amino acid transport and metabolism	N-terminal domain of ribose phosphate pyrophosphokinase;; Phosphoribosyl synthetase-associated domain;; Phosphoribosyl transferase domain	Ribose-phosphate pyrophosphokinase 1, chloroplastic OS=Arabidopsis thaliana OX=3702 GN=PRS1 PE=2 SV=2	F	Nucleotide transport and metabolism	ribose-phosphate pyrophosphokinase 1-like [Quercus suber]	molecular function: binding (GO:0005488);; molecular function: catalytic activity (GO:0003824);; biological process: metabolic process (GO:0008152);; biological process: cellular process (GO:0009987);; biological process: single-organism process (GO:0044699)
EVM0006550	EVM0006550	7.92644	22.7645	65.5443	1.30445e-16	3.90913	up	1.38521e-09	1.96557	up	0.0253077	1.70079	normal	--	--	Molecular Function: DNA binding (GO:0003677);; Cellular Component: nucleus (GO:0005634);; Biological Process: regulation of transcription, DNA-templated (GO:0006355);;	--	--	--	--	No apical meristem (NAM) protein	NAC domain-containing protein 21/22 OS=Arabidopsis thaliana OX=3702 GN=NAC021 PE=1 SV=2	S	Function unknown	NAC domain-containing protein 21/22-like [Quercus suber]	molecular function: binding (GO:0005488);; cellular component: cell (GO:0005623);; cellular component: organelle (GO:0043226);; cellular component: cell part (GO:0044464);; biological process: biological regulation (GO:0065007)
EVM0022957	EVM0022957	10.2588	2.69693	0.495246	2.30839e-23	-3.46272	down	7.69734e-07	-1.44537	down	0.275456	-1.45068	normal	[I]	Lipid transport and metabolism	Biological Process: metabolic process (GO:0008152);; Molecular Function: hydrolase activity (GO:0016787);;	--	--	[V]	Defense mechanisms	alpha/beta hydrolase fold;; Carboxylesterase family;; Steryl acetyl hydrolase	Carboxylesterase 1 OS=Actinidia eriantha OX=165200 GN=CXE1 PE=1 SV=1	I	Lipid transport and metabolism	carboxylesterase 1-like [Quercus suber]	biological process: metabolic process (GO:0008152);; molecular function: catalytic activity (GO:0003824)
EVM0018848	EVM0018848	5.62205	0.790463	0.085637	9.62821e-11	-4.86474	down	3.03181e-09	-2.30297	down	0.803932	-0.779064	normal	--	--	--	--	--	--	--	--	Zinc finger protein 3 OS=Arabidopsis thaliana OX=3702 GN=ZFP3 PE=1 SV=1	S	Function unknown	zinc finger protein 3-like [Quercus suber]	--
EVM0023500	EVM0023500	23.9124	8.34298	4.90838	9.15302e-07	-1.51675	down	3.18664e-06	-1.03958	down	0.959767	-0.347904	normal	[R]	General function prediction only	Cellular Component: integral component of membrane (GO:0016021);;	K06995|2.83183e-49|pmum:103337036|K06995 uncharacterized protein | (RefSeq) uncharacterized LOC103337036	--	--	--	Protein of unknown function (DUF861);; Ethanolamine utilisation protein EutQ	--	S	Function unknown	uncharacterized protein LOC112016307 [Quercus suber]	cellular component: membrane (GO:0016020);; cellular component: membrane part (GO:0044425)
Castanea_mollissima_newGene_4086	--	13.4707	3.06103	0.888184	1.78078e-09	-3.02569	down	9.86479e-07	-1.42902	down	0.437	-1.1906	normal	--	--	Molecular Function: nucleotide binding (GO:0000166);; Molecular Function: DNA binding (GO:0003677);; Biological Process: DNA metabolic process (GO:0006259);; Biological Process: response to stress (GO:0006950);;	--	--	[L]	Replication, recombination and repair	--	DNA repair protein recA homolog 2, mitochondrial OS=Arabidopsis thaliana OX=3702 GN=At3g10140 PE=2 SV=1	L	Replication, recombination and repair	hypothetical protein CFP56_41775 [Quercus suber]	molecular function: binding (GO:0005488);; biological process: metabolic process (GO:0008152);; biological process: cellular process (GO:0009987);; biological process: response to stimulus (GO:0050896)
EVM0020978	EVM0020978	14.0435	0.945304	0.326817	1.2445e-43	-4.51998	down	3.86428e-40	-3.3924	down	0.847321	-0.733199	normal	[K]	Transcription	Cellular Component: plant-type vacuole (GO:0000325);; Molecular Function: protein kinase activity (GO:0004672);; Molecular Function: ATP binding (GO:0005524);; Biological Process: protein phosphorylation (GO:0006468);; Cellular Component: plasmodesma (GO:0009506);; Biological Process: regulation of meristem structural organization (GO:0009934);; Cellular Component: integral component of membrane …	K00924|0|tcc:TCM_034252|K00924 [EC:2.7.1.-] | (RefSeq) Leucine-rich receptor-like protein kinase family protein	--	--	--	Protein kinase domain;; Protein tyrosine kinase;; Leucine Rich repeats (2 copies);; Leucine rich repeat;; Leucine Rich Repeat;; Leucine rich repeat N-terminal domain	Receptor protein kinase CLAVATA1 OS=Arabidopsis thaliana OX=3702 GN=CLV1 PE=1 SV=3	S	Function unknown	receptor protein kinase CLAVATA1 isoform X3 [Quercus suber]	cellular component: cell (GO:0005623);; cellular component: organelle (GO:0043226);; cellular component: cell part (GO:0044464);; molecular function: catalytic activity (GO:0003824);; biological process: metabolic process (GO:0008152);; biological process: cellular process (GO:0009987);; molecular function: binding (GO:0005488);; cellular component: cell junction (GO:0030054);; biological process…
EVM0012316	EVM0012316	16.833	7.99646	2.34788	2.0206e-21	-2.04794	down	0.00407307	-0.599718	down	0.269108	-1.19254	normal	--	--	Molecular Function: transferase activity, transferring acyl groups other than amino-acyl groups (GO:0016747);;	--	--	--	--	Transferase family	Protein ECERIFERUM 2 OS=Arabidopsis thaliana OX=3702 GN=CER2 PE=1 SV=1	S	Function unknown	protein ECERIFERUM 2-like [Quercus suber]	molecular function: catalytic activity (GO:0003824)
EVM0022999	EVM0022999	2.57314	18.9836	5.54222	2.03846e-07	1.87395	up	7.56829e-21	3.31425	up	0.125686	-1.26225	normal	--	--	--	--	--	--	--	--	Protein BIG GRAIN 1-like A OS=Arabidopsis thaliana OX=3702 GN=At3g13980 PE=3 SV=1	S	Function unknown	protein BIG GRAIN 1-like B [Quercus suber]	--
EVM0033498	EVM0033498	3.86578	13.6218	27.9748	7.27612e-40	3.69852	up	1.05002e-18	2.27364	up	0.0710465	1.30204	normal	--	--	Biological Process: amino acid transmembrane transport (GO:0003333);; Cellular Component: plasma membrane (GO:0005886);; Molecular Function: amino acid transmembrane transporter activity (GO:0015171);; Cellular Component: integral component of membrane (GO:0016021);;	--	--	[E]	Amino acid transport and metabolism	Transmembrane amino acid transporter protein;; Transmembrane amino acid transporter protein	Probable GABA transporter 2 OS=Arabidopsis thaliana OX=3702 GN=At5g41800 PE=1 SV=1	E	Amino acid transport and metabolism	probable GABA transporter 2 [Quercus suber]	biological process: single-organism process (GO:0044699);; biological process: localization (GO:0051179);; cellular component: cell (GO:0005623);; cellular component: membrane (GO:0016020);; cellular component: cell part (GO:0044464);; molecular function: transporter activity (GO:0005215);; cellular component: membrane part (GO:0044425)
Castanea_mollissima_newGene_1799	--	3.19392	0.820003	0.528742	0.0012141	-1.97645	down	0.00025864	-1.68862	down	0.994485	-0.11478	normal	--	--	--	--	--	--	--	--	--	--	--	--	--
EVM0026291	EVM0026291	16.2596	1.26064	0.354849	4.44958e-30	-4.65956	down	1.60146e-18	-3.15656	down	0.847321	-0.780484	normal	--	--	Cellular Component: integral component of membrane (GO:0016021);;	--	--	[I]	Lipid transport and metabolism	CRAL/TRIO domain;; Divergent CRAL/TRIO domain	Phosphatidylinositol/phosphatidylcholine transfer protein SFH1 OS=Arabidopsis thaliana OX=3702 GN=SFH1 PE=2 SV=1	S	Function unknown	phosphatidylinositol transfer protein 3-like [Quercus suber]	cellular component: membrane (GO:0016020);; cellular component: membrane part (GO:0044425)
EVM0014445	EVM0014445	76.1678	237.134	102.06	0.000635148	1.19658	up	6.67759e-09	2.07215	up	0.452369	-0.778987	normal	[O]	Posttranslational modification, protein turnover, chaperones	--	K13993|1.98438e-71|nnu:104601155|K13993 HSP20 family protein | (RefSeq) 17.3 kDa class I heat shock protein	Protein processing in endoplasmic reticulum (ko04141)	[O]	Posttranslational modification, protein turnover, chaperones	Hsp20/alpha crystallin family	17.5 kDa class I heat shock protein OS=Glycine max OX=3847 GN=HSP17.5-E PE=3 SV=1	O	Posttranslational modification, protein turnover, chaperones	18.5 kDa class I heat shock protein-like [Quercus suber]	--
EVM0026953	EVM0026953	1.54775	2.95399	1.92388	0.00503221	1.12649	up	0.0206565	1.35041	normal	0.992661	-0.154436	normal	--	--	--	--	--	--	--	Domain of unknown function (DUF4219)	--	S	Function unknown	hypothetical protein CFP56_07372 [Quercus suber]	--
EVM0007308	EVM0007308	0.878071	0.208044	0.258304	0.00640401	-0.967431	down	0.00281006	-1.55062	down	0.970928	0.357823	normal	--	--	--	--	--	[R]	General function prediction only	PPR repeat family;; PPR repeat;; PPR repeat;; Pentatricopeptide repeat domain;; Pentacotripeptide-repeat region of PRORP	Pentatricopeptide repeat-containing protein At3g09040, mitochondrial OS=Arabidopsis thaliana OX=3702 GN=PCMP-E88 PE=2 SV=1	S	Function unknown	pentatricopeptide repeat-containing protein At5g39350-like [Quercus suber]	--
EVM0022574	EVM0022574	11.0078	2.70274	1.12562	1.45587e-11	-2.50216	down	5.04634e-07	-1.53563	down	0.915601	-0.591038	normal	[L]	Replication, recombination and repair	--	K10871|5.62267e-146|vvi:100257115|K10871 RAD51-like protein 3 | (RefSeq) DNA repair protein RAD51 homolog 4	Homologous recombination (ko03440)	[L]	Replication, recombination and repair	Rad51;; recA bacterial DNA recombination protein;; AAA domain;; DnaB-like helicase C terminal domain	DNA repair protein RAD51 homolog 4 OS=Arabidopsis thaliana OX=3702 GN=RAD51D PE=2 SV=2	S	Function unknown	DNA repair protein RAD51 homolog 4 isoform X1 [Quercus suber]	--
EVM0031141	EVM0031141	15.2439	1.27672	0.194335	1.04304e-91	-5.43389	down	2.89869e-41	-3.07856	down	0.0813251	-1.78433	normal	[R]	General function prediction only	--	--	--	[T]	Signal transduction mechanisms	NB-ARC domain	Putative disease resistance protein RGA3 OS=Solanum bulbocastanum OX=147425 GN=RGA3 PE=2 SV=2	S	Function unknown	putative disease resistance protein RGA3 [Quercus suber]	--
EVM0021629	EVM0021629	19.0086	32.9308	40.933	5.28123e-12	1.96842	up	2.14788e-15	1.26337	up	0.652449	0.661156	normal	[T]	Signal transduction mechanisms	Molecular Function: voltage-gated chloride channel activity (GO:0005247);; Biological Process: chloride transport (GO:0006821);; Cellular Component: integral component of membrane (GO:0016021);; Biological Process: regulation of anion transmembrane transport (GO:1903959);;	K05016|0|pop:POPTR_0006s06280g|K05016 chloride channel 7 | (RefSeq) chloride channel-like family protein	--	[P]	Inorganic ion transport and metabolism	Voltage gated chloride channel	Putative chloride channel-like protein CLC-g OS=Arabidopsis thaliana OX=3702 GN=CLC-G PE=1 SV=2	P	Inorganic ion transport and metabolism	putative chloride channel-like protein CLC-g [Quercus suber]	molecular function: transporter activity (GO:0005215);; biological process: localization (GO:0051179);; biological process: biological regulation (GO:0065007);; cellular component: membrane (GO:0016020);; cellular component: membrane part (GO:0044425)
EVM0024123	EVM0024123	6.60016	13.9387	25.2063	5.49081e-19	2.76888	up	3.91113e-05	1.53618	up	0.200319	1.11348	normal	[Q]	Secondary metabolites biosynthesis, transport and catabolism	Molecular Function: oxidoreductase activity (GO:0016491);; Biological Process: oxidation-reduction process (GO:0055114);;	--	--	[R]	General function prediction only	Aldo/keto reductase family	NADPH-dependent aldo-keto reductase, chloroplastic OS=Arabidopsis thaliana OX=3702 GN=AKR4C9 PE=1 SV=1	S	Function unknown	NADPH-dependent aldo-keto reductase, chloroplastic-like [Quercus suber]	molecular function: catalytic activity (GO:0003824);; biological process: metabolic process (GO:0008152);; biological process: single-organism process (GO:0044699)
EVM0032797	EVM0032797	2.96057	0.909109	0.663172	1.31099e-05	-1.32169	down	0.00486527	-1.21237	down	0.996654	-0.0338418	normal	--	--	--	--	--	--	--	Leucine Rich Repeat	F-box/LRR-repeat protein At4g14103 OS=Arabidopsis thaliana OX=3702 GN=At4g14103 PE=2 SV=1	S	Function unknown	f-box/fbd/lrr-repeat protein [Quercus suber]	--
EVM0013600	EVM0013600	2.30745	0.426428	0.34046	1.32219e-08	-1.89862	down	2.86492e-06	-1.91279	down	0.99638	0.0478427	normal	[R]	General function prediction only	--	--	--	[T]	Signal transduction mechanisms	NB-ARC domain	Putative disease resistance protein RGA3 OS=Solanum bulbocastanum OX=147425 GN=RGA3 PE=2 SV=2	S	Function unknown	putative disease resistance protein RGA3 [Quercus suber]	--
EVM0023114	EVM0023114	3.41645	0	0	2.93163e-06	-7.50147	down	7.15677e-07	-6.16438	down	--	--	--	--	--	--	--	--	--	--	Homeobox domain	WUSCHEL-related homeobox 3 OS=Arabidopsis thaliana OX=3702 GN=WOX3 PE=1 SV=1	K	Transcription	WUSCHEL-related homeobox 3 [Quercus suber]	--
EVM0025358	EVM0025358	9.74411	18.5728	14.9838	4.225e-15	1.41851	up	3.38312e-09	1.39092	up	0.995177	0.0532226	normal	[QV]	Secondary metabolites biosynthesis, transport and catabolism;; Defense mechanisms	Molecular Function: binding (GO:0005488);; Cellular Component: membrane (GO:0016020);; Molecular Function: oxidoreductase activity, acting on paired donors, with incorporation or reduction of molecular oxygen, NAD(P)H as one donor, and incorporation of one atom of oxygen (GO:0016709);; Biological Process: indole glucosinolate metabolic process (GO:0042343);; Biological Process: secondary metaboli…	--	--	[Q]	Secondary metabolites biosynthesis, transport and catabolism	Cytochrome P450	Isoflavone 2&apos;-hydroxylase OS=Glycyrrhiza echinata OX=46348 GN=CYP81E1 PE=1 SV=2	Q	Secondary metabolites biosynthesis, transport and catabolism	isoflavone 2&apos;-hydroxylase-like [Quercus suber]	molecular function: binding (GO:0005488);; cellular component: membrane (GO:0016020);; molecular function: catalytic activity (GO:0003824);; biological process: metabolic process (GO:0008152);; biological process: single-organism process (GO:0044699);; biological process: cellular process (GO:0009987);; biological process: response to stimulus (GO:0050896);; biological process: multi-organism pro…
Castanea_mollissima_newGene_6805	--	0.266213	0.569129	0.515851	--	--	--	--	--	--	0.995177	0.0923353	normal	--	--	--	--	--	--	--	--	--	--	--	hypothetical protein CFP56_50070 [Quercus suber]	--
EVM0001058	EVM0001058	11.1816	2.70779	1.02292	5.6407e-48	-2.63853	down	3.00415e-15	-1.56324	down	0.678767	-0.836141	normal	--	--	--	--	--	--	--	--	Centromere protein C OS=Arabidopsis thaliana OX=3702 GN=CENPC PE=2 SV=1	S	Function unknown	centromere protein C isoform X1 [Quercus suber]	--
EVM0012567	EVM0012567	1.33512	0.33019	0.0624075	4.58355e-05	-3.53326	down	0.0151839	-1.46745	normal	--	--	--	[T]	Signal transduction mechanisms	--	--	--	[T]	Signal transduction mechanisms	Carbohydrate-binding protein of the ER;; Protein tyrosine kinase;; Protein kinase domain;; Di-glucose binding within endoplasmic reticulum	Putative receptor-like protein kinase At5g39000 OS=Arabidopsis thaliana OX=3702 GN=At5g39000 PE=3 SV=1	T	Signal transduction mechanisms	receptor-like protein kinase FERONIA [Quercus suber]	--
EVM0003066	EVM0003066	38.1901	180.156	152.739	9.29258e-30	2.83429	up	4.68853e-37	2.69277	up	0.985449	0.153535	normal	--	--	Molecular Function: translation initiation factor activity (GO:0003743);; Biological Process: translational initiation (GO:0006413);;	K03113|7.78531e-63|csv:101214921|K03113 translation initiation factor 1 | (RefSeq) protein translation factor SUI1 homolog 2-like	RNA transport (ko03013)	[J]	Translation, ribosomal structure and biogenesis	Translation initiation factor SUI1	Protein translation factor SUI1 homolog 2 OS=Arabidopsis thaliana OX=3702 GN=At1g54290 PE=3 SV=1	J	Translation, ribosomal structure and biogenesis	protein translation factor SUI1 homolog 2-like [Quercus suber]	molecular function: binding (GO:0005488);; biological process: metabolic process (GO:0008152);; biological process: cellular process (GO:0009987)
EVM0028539	EVM0028539	87.0639	30.3806	13.333	5.01007e-15	-1.8603	down	6.08633e-07	-1.04499	down	0.649455	-0.69447	normal	--	--	Biological Process: post-embryonic development (GO:0009791);; Cellular Component: intracellular part (GO:0044424);;	K14495|1.90607e-59|vvi:100266007|K14495 F-box protein GID2 | (RefSeq) F-box protein GID2	Plant hormone signal transduction (ko04075)	--	--	F-box domain;; F-box-like	F-box protein GID2 OS=Arabidopsis thaliana OX=3702 GN=GID2 PE=1 SV=1	S	Function unknown	F-box protein GID2 [Quercus suber]	biological process: multicellular organismal process (GO:0032501);; biological process: single-organism process (GO:0044699);; cellular component: cell (GO:0005623);; cellular component: cell part (GO:0044464)
EVM0015299	EVM0015299	6.26165	0.970612	0.589626	1.80392e-31	-2.57102	down	4.44092e-19	-2.19333	down	0.979312	-0.254668	normal	[K]	Transcription	--	--	--	[T]	Signal transduction mechanisms	NB-ARC domain	Putative disease resistance protein RGA3 OS=Solanum bulbocastanum OX=147425 GN=RGA3 PE=2 SV=2	S	Function unknown	putative disease resistance protein RGA3 [Quercus suber]	--
EVM0014798	EVM0014798	75.9274	3.1097	4.23945	0.0143606	-2.88966	normal	4.81778e-48	-4.099	down	0.919394	0.584165	normal	--	--	--	--	--	--	--	Gibberellin regulated protein	Snakin-2 OS=Solanum tuberosum OX=4113 GN=SN2 PE=1 SV=1	O	Posttranslational modification, protein turnover, chaperones	gibberellin-regulated protein 1-like [Quercus suber]	--
EVM0002076	EVM0002076	26.1295	35.8742	39.1373	2.43997e-18	1.41031	up	8.89351e-08	0.927467	up	0.838322	0.467261	normal	--	--	Cellular Component: proteasome complex (GO:0000502);; Cellular Component: nucleus (GO:0005634);; Cellular Component: cytosol (GO:0005829);; Biological Process: proteasome assembly (GO:0043248);;	K11876|1.4531e-113|gra:105795497|K11876 proteasome assembly chaperone 2 | (RefSeq) proteasome assembly chaperone 2	--	[S]	Function unknown	PAC2 family	--	O	Posttranslational modification, protein turnover, chaperones	proteasome assembly chaperone 2 isoform X1 [Quercus suber]	cellular component: cell (GO:0005623);; cellular component: macromolecular complex (GO:0032991);; cellular component: cell part (GO:0044464);; cellular component: organelle (GO:0043226);; biological process: cellular process (GO:0009987);; biological process: cellular component organization or biogenesis (GO:0071840)
EVM0003272	EVM0003272	41.7446	14.2108	7.42497	5.09186e-14	-1.71466	down	6.54812e-11	-1.0792	down	0.836374	-0.523733	normal	[E]	Amino acid transport and metabolism	Molecular Function: argininosuccinate lyase activity (GO:0004056);; Cellular Component: cytosol (GO:0005829);; Cellular Component: chloroplast stroma (GO:0009570);; Biological Process: arginine biosynthetic process via ornithine (GO:0042450);; Biological Process: protein tetramerization (GO:0051262);;	K01755|0|tcc:TCM_034512|K01755 argininosuccinate lyase [EC:4.3.2.1] | (RefSeq) L-Aspartase-like family protein	Arginine biosynthesis (ko00220);; Alanine, aspartate and glutamate metabolism (ko00250);; Biosynthesis of amino acids (ko01230)	[E]	Amino acid transport and metabolism	Lyase;; Argininosuccinate lyase C-terminal	Argininosuccinate lyase, chloroplastic OS=Arabidopsis thaliana OX=3702 GN=At5g10920 PE=2 SV=1	E	Amino acid transport and metabolism	argininosuccinate lyase, chloroplastic-like [Quercus suber]	molecular function: catalytic activity (GO:0003824);; cellular component: cell (GO:0005623);; cellular component: cell part (GO:0044464);; cellular component: organelle (GO:0043226);; cellular component: organelle part (GO:0044422);; biological process: metabolic process (GO:0008152);; biological process: cellular process (GO:0009987);; biological process: single-organism process (GO:0044699);; b…
EVM0026675	EVM0026675	23.6842	34.1262	40.1997	9.67876e-10	1.61523	up	3.32576e-07	0.994147	up	0.747896	0.584539	normal	[J]	Translation, ribosomal structure and biogenesis	Molecular Function: translation initiation factor activity (GO:0003743);; Molecular Function: guanyl-nucleotide exchange factor activity (GO:0005085);; Cellular Component: eukaryotic translation initiation factor 2B complex (GO:0005851);; Biological Process: regulation of translational initiation (GO:0006446);; Biological Process: L-methionine salvage from methylthioadenosine (GO:0019509);; Biolo…	K03239|0|cmo:103500646|K03239 translation initiation factor eIF-2B subunit alpha | (RefSeq) translation initiation factor eIF-2B subunit alpha	RNA transport (ko03013)	[J]	Translation, ribosomal structure and biogenesis	Initiation factor 2 subunit family	Methylthioribose-1-phosphate isomerase OS=Nicotiana tabacum OX=4097 GN=CIG2 PE=2 SV=1	J	Translation, ribosomal structure and biogenesis	translation initiation factor eIF-2B subunit alpha-like [Quercus suber]	molecular function: binding (GO:0005488);; biological process: metabolic process (GO:0008152);; biological process: cellular process (GO:0009987);; molecular function: molecular function regulator (GO:0098772);; biological process: biological regulation (GO:0065007);; cellular component: cell (GO:0005623);; cellular component: macromolecular complex (GO:0032991);; cellular component: cell part (G…
EVM0024024	EVM0024024	3.94997	5.73072	5.96313	0.0006671	1.47171	up	0.0455845	0.994588	normal	0.95478	0.383006	normal	--	--	--	--	--	--	--	--	--	S	Function unknown	early nodulin-20 [Quercus suber]	--
EVM0004543	EVM0004543	3.52634	6.63644	4.977	1.28817e-06	1.30329	up	6.41664e-05	1.37338	up	0.995731	-0.0378593	normal	[T]	Signal transduction mechanisms	Molecular Function: ferric-chelate reductase activity (GO:0000293);; Cellular Component: integral component of membrane (GO:0016021);; Biological Process: oxidation-reduction process (GO:0055114);;	--	--	[PQ]	Inorganic ion transport and metabolism;; Secondary metabolites biosynthesis, transport and catabolism	Ferric reductase NAD binding domain;; FAD-binding domain;; Ferric reductase like transmembrane component;; Oxidoreductase NAD-binding domain	Ferric reduction oxidase 4 OS=Arabidopsis thaliana OX=3702 GN=FRO4 PE=2 SV=1	U	Intracellular trafficking, secretion, and vesicular transport	ferric reduction oxidase 4-like [Quercus suber]	molecular function: catalytic activity (GO:0003824);; biological process: metabolic process (GO:0008152);; biological process: single-organism process (GO:0044699);; cellular component: membrane (GO:0016020);; cellular component: membrane part (GO:0044425)
EVM0011125	EVM0011125	30.2575	74.3074	60.473	4.03304e-14	1.85121	up	1.37901e-31	1.76662	up	0.991663	0.105525	normal	[T]	Signal transduction mechanisms	--	--	--	[R]	General function prediction only	WD domain, G-beta repeat;; Anaphase-promoting complex subunit 4 WD40 domain;; LisH	Transcriptional corepressor LEUNIG OS=Arabidopsis thaliana OX=3702 GN=LUG PE=1 SV=2	S	Function unknown	transcriptional corepressor LEUNIG-like [Quercus suber]	--
EVM0029672	EVM0029672	17.7366	33.0417	31.2836	9.45981e-21	1.65197	up	1.97271e-18	1.36804	up	0.944529	0.288154	normal	[T]	Signal transduction mechanisms	Biological Process: pattern recognition receptor signaling pathway (GO:0002221);; Molecular Function: protein serine/threonine kinase activity (GO:0004674);; Molecular Function: non-membrane spanning protein tyrosine kinase activity (GO:0004715);; Molecular Function: ATP binding (GO:0005524);; Cellular Component: plasma membrane (GO:0005886);; Biological Process: defense response to bacterium, in…	K13430|0|rcu:8286746|K13430 serine/threonine-protein kinase PBS1 [EC:2.7.11.1] | (RefSeq) serine/threonine-protein kinase PBS1	Plant-pathogen interaction (ko04626)	[T]	Signal transduction mechanisms	Protein kinase domain;; Protein tyrosine kinase	Serine/threonine-protein kinase PBS1 OS=Arabidopsis thaliana OX=3702 GN=PBS1 PE=1 SV=1	T	Signal transduction mechanisms	serine/threonine-protein kinase PBS1 [Quercus suber]	biological process: immune system process (GO:0002376);; biological process: cellular process (GO:0009987);; biological process: signaling (GO:0023052);; biological process: single-organism process (GO:0044699);; biological process: response to stimulus (GO:0050896);; biological process: biological regulation (GO:0065007);; molecular function: catalytic activity (GO:0003824);; biological process:…
EVM0024322	EVM0024322	3.21721	1.27857	0.100154	6.3427e-17	-4.07831	down	0.0219236	-0.841884	normal	0.189051	-1.78015	normal	--	--	Molecular Function: zinc ion binding (GO:0008270);;	--	--	[O]	Posttranslational modification, protein turnover, chaperones	Ring finger domain;; RING-like zinc finger;; Zinc finger, C3HC4 type (RING finger);; RING-H2 zinc finger domain;; Zinc finger, C3HC4 type (RING finger)	Receptor homology region, transmembrane domain- and RING domain-containing protein 2 OS=Oryza sativa subsp. japonica OX=39947 GN=RMR1 PE=2 SV=2	O	Posttranslational modification, protein turnover, chaperones	uncharacterized protein LOC112035309 isoform X1 [Quercus suber]	molecular function: binding (GO:0005488)
EVM0012405	EVM0012405	1.97236	0.420165	0.176449	6.72276e-05	-2.62899	down	0.00621794	-1.65426	down	--	--	--	--	--	--	--	--	[T]	Signal transduction mechanisms	Cactus-binding C-terminus of cactin protein	Cactin OS=Arabidopsis thaliana OX=3702 GN=CTN PE=1 SV=1	S	Function unknown	cactin-like [Quercus suber]	--
EVM0029381	EVM0029381	241.23	308.552	342.677	9.9264e-15	1.33027	up	2.09581e-06	0.829558	up	0.775709	0.492432	normal	--	--	--	--	--	--	--	RCD1-SRO-TAF4 (RST) plant domain	Inactive poly [ADP-ribose] polymerase RCD1 OS=Arabidopsis thaliana OX=3702 GN=RCD1 PE=1 SV=1	S	Function unknown	inactive poly [ADP-ribose] polymerase RCD1-like isoform X2 [Quercus suber]	--
EVM0011897	EVM0011897	3.76535	0.206639	0.067004	3.5683e-13	-4.86537	down	1.8164e-11	-3.56444	down	--	--	--	--	--	Molecular Function: DNA binding (GO:0003677);; Cellular Component: nucleus (GO:0005634);; Biological Process: regulation of transcription, DNA-templated (GO:0006355);;	--	--	--	--	No apical meristem (NAM) protein	NAC domain-containing protein 73 OS=Arabidopsis thaliana OX=3702 GN=NAC073 PE=2 SV=1	S	Function unknown	NAC domain-containing protein 73-like isoform X1 [Quercus suber]	molecular function: binding (GO:0005488);; cellular component: cell (GO:0005623);; cellular component: organelle (GO:0043226);; cellular component: cell part (GO:0044464);; biological process: biological regulation (GO:0065007)
EVM0029976	EVM0029976	35.5897	13.2154	7.83357	8.13036e-17	-1.35899	down	1.32871e-07	-0.954369	down	0.944278	-0.325042	normal	[M]	Cell wall/membrane/envelope biogenesis	Molecular Function: 3-beta-hydroxy-delta5-steroid dehydrogenase activity (GO:0003854);; Cellular Component: endoplasmic reticulum membrane (GO:0005789);; Biological Process: steroid biosynthetic process (GO:0006694);; Cellular Component: integral component of membrane (GO:0016021);; Biological Process: oxidation-reduction process (GO:0055114);;	K07748|0|egr:104436360|K07748 sterol-4alpha-carboxylate 3-dehydrogenase (decarboxylating) [EC:1.1.1.170] | (RefSeq) 3beta-hydroxysteroid-dehydrogenase/decarboxylase	Steroid biosynthesis (ko00100)	[IE]	Lipid transport and metabolism;; Amino acid transport and metabolism	3-beta hydroxysteroid dehydrogenase/isomerase family;; Reticulon;; NAD dependent epimerase/dehydratase family;; GDP-mannose 4,6 dehydratase;; Male sterility protein;; NAD(P)H-binding;; RmlD substrate binding domain;; Polysaccharide biosynthesis protein;; NmrA-like family	3beta-hydroxysteroid-dehydrogenase/decarboxylase isoform 2 OS=Arabidopsis thaliana OX=3702 GN=3BETAHSD/D2 PE=2 SV=2	M	Cell wall/membrane/envelope biogenesis	3beta-hydroxysteroid-dehydrogenase/decarboxylase [Quercus suber]	molecular function: catalytic activity (GO:0003824);; biological process: metabolic process (GO:0008152);; biological process: single-organism process (GO:0044699);; cellular component: cell (GO:0005623);; cellular component: membrane (GO:0016020);; cellular component: organelle (GO:0043226);; cellular component: organelle part (GO:0044422);; cellular component: membrane part (GO:0044425);; cellu…
EVM0033234	EVM0033234	22.0071	6.16143	4.79044	3.36967e-08	-1.42819	down	2.74815e-11	-1.35821	down	0.996815	-0.0234598	normal	--	--	Molecular Function: zinc ion binding (GO:0008270);; Cellular Component: integral component of membrane (GO:0016021);;	--	--	[A]	RNA processing and modification	RING-variant domain	--	O	Posttranslational modification, protein turnover, chaperones	uncharacterized protein LOC112035280 [Quercus suber]	molecular function: binding (GO:0005488);; cellular component: membrane (GO:0016020);; cellular component: membrane part (GO:0044425)
EVM0002234	EVM0002234	3.21387	1.03265	0.547133	0.000726637	-1.77648	down	0.0139995	-1.13876	normal	0.97754	-0.307687	normal	--	--	Molecular Function: metal ion binding (GO:0046872);;	K11975|6.30434e-131|jcu:105630263|K11975 E3 ubiquitin-protein ligase RNF144 [EC:2.3.2.27] | (RefSeq) probable E3 ubiquitin-protein ligase RNF144A-B	--	[O]	Posttranslational modification, protein turnover, chaperones	IBR domain, a half RING-finger domain;; Zinc finger, C3HC4 type (RING finger)	ATP-dependent RNA helicase DEAH12, chloroplastic OS=Arabidopsis thaliana OX=3702 GN=At5g10370 PE=3 SV=1	S	Function unknown	probable E3 ubiquitin-protein ligase RNF217 [Quercus suber]	molecular function: binding (GO:0005488)
EVM0029253	EVM0029253	6.22894	0.394166	0.143273	1.9366e-15	-4.43391	down	1.49152e-09	-3.34138	down	--	--	--	--	--	--	--	--	--	--	--	Probable NAD(P)H dehydrogenase subunit CRR3, chloroplastic OS=Arabidopsis thaliana OX=3702 GN=CRR3 PE=2 SV=1	S	Function unknown	probable NAD(P)H dehydrogenase subunit CRR3, chloroplastic [Quercus suber]	--
EVM0017899	EVM0017899	32.6234	12.0323	7.62956	3.76054e-07	-1.24131	down	7.41018e-07	-0.961957	down	0.982718	-0.208245	normal	--	--	--	--	--	--	--	--	--	--	--	hypothetical protein CFP56_54839 [Quercus suber]	--
EVM0023076	EVM0023076	16.6998	27.085	28.8009	0.000164845	1.68511	up	1.30349e-10	1.16505	up	0.89478	0.474123	normal	[QV]	Secondary metabolites biosynthesis, transport and catabolism;; Defense mechanisms	Molecular Function: monooxygenase activity (GO:0004497);; Molecular Function: iron ion binding (GO:0005506);; Cellular Component: mitochondrion (GO:0005739);; Biological Process: defense response (GO:0006952);; Cellular Component: chloroplast thylakoid membrane (GO:0009535);; Biological Process: response to wounding (GO:0009611);; Biological Process: jasmonic acid biosynthetic process (GO:0009695…	K01723|0|pop:POPTR_0002s13220g|K01723 hydroperoxide dehydratase [EC:4.2.1.92] | (RefSeq) POPTRDRAFT_644172; allene oxide synthase family protein	alpha-Linolenic acid metabolism (ko00592)	--	--	Cytochrome P450	Allene oxide synthase 1, chloroplastic OS=Solanum lycopersicum OX=4081 GN=AOS1 PE=2 SV=1	Q	Secondary metabolites biosynthesis, transport and catabolism	allene oxide synthase 1, chloroplastic [Quercus suber]	molecular function: catalytic activity (GO:0003824);; biological process: metabolic process (GO:0008152);; biological process: single-organism process (GO:0044699);; molecular function: binding (GO:0005488);; cellular component: cell (GO:0005623);; cellular component: organelle (GO:0043226);; cellular component: cell part (GO:0044464);; biological process: response to stimulus (GO:0050896);; cell…
EVM0028058	EVM0028058	5.88969	12.8728	16.3394	3.33431e-32	2.30526	up	1.89468e-13	1.59428	up	0.639479	0.665444	normal	[IQ]	Lipid transport and metabolism;; Secondary metabolites biosynthesis, transport and catabolism	--	--	--	[I]	Lipid transport and metabolism	AMP-binding enzyme;; AMP-binding enzyme C-terminal domain	4-coumarate--CoA ligase-like 9 OS=Arabidopsis thaliana OX=3702 GN=4CLL9 PE=1 SV=2	IQ	Lipid transport and metabolism;; Secondary metabolites biosynthesis, transport and catabolism	4-coumarate--CoA ligase-like 9 [Quercus suber]	--
EVM0009946	EVM0009946	38.7747	12.6627	4.82922	1.85093e-17	-2.22749	down	5.34962e-09	-1.13675	down	0.605585	-0.873882	normal	--	--	Cellular Component: plasma membrane (GO:0005886);; Cellular Component: integral component of membrane (GO:0016021);;	--	--	--	--	Domain of unknown function (DUF588)	CASP-like protein 2C1 OS=Glycine max OX=3847 PE=2 SV=1	S	Function unknown	CASP-like protein 2C1 [Quercus suber]	cellular component: cell (GO:0005623);; cellular component: membrane (GO:0016020);; cellular component: cell part (GO:0044464);; cellular component: membrane part (GO:0044425)
EVM0016481	EVM0016481	7.10166	15.2435	24.2908	3.42959e-18	2.62301	up	7.10946e-08	1.56318	up	0.324828	0.966348	normal	--	--	Cellular Component: membrane (GO:0016020);;	--	--	--	--	PLAC8 family;; PLAC8 family	Protein PLANT CADMIUM RESISTANCE 2 OS=Arabidopsis thaliana OX=3702 GN=PCR2 PE=1 SV=1	S	Function unknown	protein PLANT CADMIUM RESISTANCE 2-like [Quercus suber]	cellular component: membrane (GO:0016020)
EVM0004759	EVM0004759	1.61331	2.11117	2.55878	1.01406e-07	1.44704	up	0.0509482	0.851204	normal	0.912998	0.496223	normal	--	--	Molecular Function: zinc ion binding (GO:0008270);;	--	--	[R]	General function prediction only	PPR repeat family;; PPR repeat;; DYW family of nucleic acid deaminases;; PPR repeat;; Pentatricopeptide repeat domain;; Tetratricopeptide repeat	Pentatricopeptide repeat-containing protein At1g59720, chloroplastic/mitochondrial OS=Arabidopsis thaliana OX=3702 GN=PCMP-H51 PE=1 SV=2	S	Function unknown	pentatricopeptide repeat-containing protein At1g59720, chloroplastic/mitochondrial [Quercus suber]	molecular function: binding (GO:0005488)
EVM0032301	EVM0032301	8.35944	12.5009	15.3736	6.34745e-10	1.73416	up	8.01609e-06	1.04706	up	0.740888	0.630622	normal	--	--	Molecular Function: SNARE binding (GO:0000149);; Molecular Function: SNAP receptor activity (GO:0005484);; Cellular Component: vacuole (GO:0005773);; Biological Process: exocytosis (GO:0006887);; Biological Process: vesicle fusion (GO:0006906);; Biological Process: response to salt stress (GO:0009651);; Cellular Component: integral component of membrane (GO:0016021);; Cellular Component: SNARE co…	K08515|6.91889e-138|pper:PRUPE_ppa011184mg|K08515 vesicle-associated membrane protein 7 | (RefSeq) hypothetical protein	SNARE interactions in vesicular transport (ko04130)	[U]	Intracellular trafficking, secretion, and vesicular transport	Synaptobrevin;; Regulated-SNARE-like domain	Vesicle-associated membrane protein 714 OS=Arabidopsis thaliana OX=3702 GN=VAMP714 PE=1 SV=1	U	Intracellular trafficking, secretion, and vesicular transport	PREDICTED: vesicle-associated membrane protein 714 [Juglans regia]	molecular function: binding (GO:0005488);; cellular component: cell (GO:0005623);; cellular component: organelle (GO:0043226);; cellular component: cell part (GO:0044464);; biological process: cellular process (GO:0009987);; biological process: single-organism process (GO:0044699);; biological process: localization (GO:0051179);; biological process: cellular component organization or biogenesis (…
EVM0007017	EVM0007017	6.8428	1.82184	1.7199	0.000508541	-1.20611	down	0.000227309	-1.4064	down	0.990295	0.17653	normal	--	--	--	--	--	--	--	--	--	S	Function unknown	uncharacterized protein LOC112001891 [Quercus suber]	--
EVM0004090	EVM0004090	12.3262	19.9183	19.8569	1.11948e-14	1.52493	up	7.7724e-10	1.16191	up	0.919394	0.355551	normal	--	--	Molecular Function: ATP binding (GO:0005524);; Biological Process: signal transduction (GO:0007165);; Molecular Function: histidine phosphotransfer kinase activity (GO:0009927);; Molecular Function: protein homodimerization activity (GO:0042803);; Biological Process: protein autophosphorylation (GO:0046777);;	K00898|0|tcc:TCM_021489|K00898 pyruvate dehydrogenase kinase 2/3/4 [EC:2.7.11.2] | (RefSeq) Pyruvate dehydrogenase kinase isoform 1	--	[T]	Signal transduction mechanisms	Mitochondrial branched-chain alpha-ketoacid dehydrogenase kinase;; Histidine kinase-, DNA gyrase B-, and HSP90-like ATPase	[Pyruvate dehydrogenase (acetyl-transferring)] kinase, mitochondrial OS=Arabidopsis thaliana OX=3702 GN=PDK PE=1 SV=1	T	Signal transduction mechanisms	pyruvate dehydrogenase (acetyl-transferring) kinase, mitochondrial [Quercus suber]	molecular function: binding (GO:0005488);; biological process: cellular process (GO:0009987);; biological process: biological regulation (GO:0065007);; molecular function: catalytic activity (GO:0003824);; molecular function: signal transducer activity (GO:0004871);; biological process: metabolic process (GO:0008152);; biological process: signaling (GO:0023052);; biological process: single-organi…
EVM0023108	EVM0023108	13.8839	76.2961	30.8812	9.88654e-11	1.98065	up	4.77654e-21	2.90964	up	0.385724	-0.831467	normal	[M]	Cell wall/membrane/envelope biogenesis	Molecular Function: 3-beta-hydroxy-delta5-steroid dehydrogenase activity (GO:0003854);; Biological Process: steroid biosynthetic process (GO:0006694);; Molecular Function: dihydrokaempferol 4-reductase activity (GO:0045552);; Molecular Function: coenzyme binding (GO:0050662);; Biological Process: oxidation-reduction process (GO:0055114);;	--	--	[V]	Defense mechanisms	3-beta hydroxysteroid dehydrogenase/isomerase family;; NAD(P)H-binding;; NAD dependent epimerase/dehydratase family	Cinnamoyl-CoA reductase-like SNL6 OS=Oryza sativa subsp. japonica OX=39947 GN=SNL6 PE=3 SV=1	M	Cell wall/membrane/envelope biogenesis	cinnamoyl-CoA reductase-like SNL6 isoform X2 [Quercus suber]	molecular function: catalytic activity (GO:0003824);; biological process: metabolic process (GO:0008152);; biological process: single-organism process (GO:0044699);; molecular function: binding (GO:0005488)
EVM0031019	EVM0031019	132.482	20.1601	5.36274	1.85289e-54	-3.83744	down	1.09794e-25	-2.23566	down	0.132602	-1.34626	normal	--	--	Cellular Component: plasma membrane (GO:0005886);; Cellular Component: integral component of membrane (GO:0016021);;	--	--	--	--	Protein of unknown function (DUF1218)	--	S	Function unknown	uncharacterized protein LOC112001840 [Quercus suber]	cellular component: cell (GO:0005623);; cellular component: membrane (GO:0016020);; cellular component: cell part (GO:0044464);; cellular component: membrane part (GO:0044425)
EVM0015018	EVM0015018	0.662381	0.077023	0.051198	0.00344504	-2.72713	down	0.00804717	-2.25337	down	--	--	--	[O]	Posttranslational modification, protein turnover, chaperones	Molecular Function: ATP binding (GO:0005524);; Biological Process: protein folding (GO:0006457);; Molecular Function: unfolded protein binding (GO:0051082);;	K03283|0|egu:105051365|K03283 heat shock 70kDa protein 1/8 | (RefSeq) stromal 70 kDa heat shock-related protein, chloroplastic	--	[O]	Posttranslational modification, protein turnover, chaperones	Hsp70 protein;; MreB/Mbl protein	Stromal 70 kDa heat shock-related protein, chloroplastic OS=Pisum sativum OX=3888 GN=HSP70 PE=2 SV=1	O	Posttranslational modification, protein turnover, chaperones	stromal 70 kDa heat shock-related protein, chloroplastic-like [Quercus suber]	molecular function: binding (GO:0005488);; biological process: cellular process (GO:0009987)
EVM0030111	EVM0030111	10.9704	0.687527	0.118879	2.91296e-18	-5.56664	down	5.4986e-14	-3.42385	down	--	--	--	--	--	--	--	--	--	--	Epidermal patterning factor proteins	EPIDERMAL PATTERNING FACTOR-like protein 2 OS=Arabidopsis thaliana OX=3702 GN=EPFL2 PE=2 SV=1	S	Function unknown	EPIDERMAL PATTERNING FACTOR-like protein 2 [Quercus suber]	--
Castanea_mollissima_newGene_383	--	3.47197	1.07763	0.318528	1.2177e-08	-2.6504	down	0.00179488	-1.19529	down	0.792958	-0.865988	normal	[T]	Signal transduction mechanisms	--	--	--	[T]	Signal transduction mechanisms	Protein kinase domain;; Protein tyrosine kinase	Probable LRR receptor-like serine/threonine-protein kinase RKF3 OS=Arabidopsis thaliana OX=3702 GN=RKF3 PE=2 SV=1	T	Signal transduction mechanisms	hypothetical protein DCAR_018380 [Daucus carota subsp. sativus]	--
EVM0024516	EVM0024516	3.6064	0.963883	0.242252	1.77457e-05	-2.79026	down	0.0612786	-1.35408	normal	--	--	--	--	--	--	--	--	--	--	--	--	--	--	hypothetical protein CFP56_78942 [Quercus suber]	--
EVM0018799	EVM0018799	3.82268	23.5108	62.6011	6.89433e-21	5.29774	up	7.02268e-10	3.00972	up	0.00968496	1.95249	up	[E]	Amino acid transport and metabolism	Molecular Function: L-aspartate:2-oxoglutarate aminotransferase activity (GO:0004069);; Molecular Function: copper ion binding (GO:0005507);; Cellular Component: mitochondrion (GO:0005739);; Biological Process: cellular amino acid metabolic process (GO:0006520);; Biological Process: biosynthetic process (GO:0009058);; Molecular Function: pyridoxal phosphate binding (GO:0030170);; Molecular Functi…	K14455|0|vvi:100254127|K14455 aspartate aminotransferase, mitochondrial [EC:2.6.1.1] | (RefSeq) aspartate aminotransferase, mitochondrial	Arginine biosynthesis (ko00220);; Alanine, aspartate and glutamate metabolism (ko00250);; Cysteine and methionine metabolism (ko00270);; Arginine and proline metabolism (ko00330);; Tyrosine metabolism (ko00350);; Phenylalanine metabolism (ko00360);; Phenylalanine, tyrosine and tryptophan biosynthesis (ko00400);; Carbon fixation in photosynthetic organisms (ko00710);; Isoquinoline alkaloid biosynt…	[E]	Amino acid transport and metabolism	Aminotransferase class I and II	Aspartate aminotransferase, mitochondrial OS=Arabidopsis thaliana OX=3702 GN=ASP1 PE=1 SV=1	E	Amino acid transport and metabolism	aspartate aminotransferase, mitochondrial [Quercus suber]	molecular function: catalytic activity (GO:0003824);; molecular function: binding (GO:0005488);; cellular component: cell (GO:0005623);; cellular component: organelle (GO:0043226);; cellular component: cell part (GO:0044464);; biological process: metabolic process (GO:0008152);; biological process: cellular process (GO:0009987);; biological process: single-organism process (GO:0044699)
EVM0030960	EVM0030960	0.631726	3.70818	8.75283	2.3847e-21	4.62933	up	2.33013e-11	2.95399	up	0.104826	1.43564	normal	[K]	Transcription	--	--	--	--	--	Protein tyrosine kinase;; Protein kinase domain;; Leucine rich repeat;; Leucine Rich repeats (2 copies);; Leucine rich repeat N-terminal domain	Probable LRR receptor-like serine/threonine-protein kinase At1g06840 OS=Arabidopsis thaliana OX=3702 GN=At1g06840 PE=2 SV=2	T	Signal transduction mechanisms	probable LRR receptor-like serine/threonine-protein kinase At1g06840 [Quercus suber]	--
EVM0013012	EVM0013012	27.2641	48.6987	43.4454	1.00689e-13	1.50459	up	3.74337e-13	1.30215	up	0.969321	0.213041	normal	--	--	--	--	--	--	--	Protein of unknown function (DUF789)	--	S	Function unknown	uncharacterized protein LOC112001842 [Quercus suber]	--
EVM0012466	EVM0012466	10.3761	14.5253	18.1863	8.18856e-15	1.64589	up	1.53353e-05	0.954033	up	0.670856	0.647839	normal	[OJ]	Posttranslational modification, protein turnover, chaperones;; Translation, ribosomal structure and biogenesis	Biological Process: peptidyl-lysine modification to peptidyl-hypusine (GO:0008612);; Biological Process: embryo sac development (GO:0009553);; Molecular Function: homospermidine synthase (spermidine-specific) activity (GO:0050514);;	K00809|0|rcu:8271139|K00809 deoxyhypusine synthase [EC:2.5.1.46] | (RefSeq) deoxyhypusine synthase	--	[O]	Posttranslational modification, protein turnover, chaperones	Deoxyhypusine synthase	Deoxyhypusine synthase OS=Arabidopsis thaliana OX=3702 GN=DHS PE=2 SV=1	O	Posttranslational modification, protein turnover, chaperones	deoxyhypusine synthase isoform X1 [Quercus suber]	biological process: metabolic process (GO:0008152);; biological process: cellular process (GO:0009987);; biological process: multicellular organismal process (GO:0032501);; biological process: developmental process (GO:0032502);; biological process: single-organism process (GO:0044699);; molecular function: catalytic activity (GO:0003824)
EVM0010982	EVM0010982	22.598	7.78536	3.93552	3.83242e-18	-1.73094	down	5.80133e-09	-1.05905	down	0.844929	-0.545739	normal	[KL]	Transcription;; Replication, recombination and repair	Molecular Function: ATP binding (GO:0005524);; Molecular Function: transferase activity (GO:0016740);;	K14440|0|pmum:103323288|K14440 SWI/SNF-related matrix-associated actin-dependent regulator of chromatin subfamily A-like protein 1 [EC:3.6.4.12] | (RefSeq) SWI/SNF-related matrix-associated actin-dependent regulator of chromatin subfamily A-like protein 1	--	[B]	Chromatin structure and dynamics	SNF2 family N-terminal domain;; Helicase conserved C-terminal domain	Protein CHROMATIN REMODELING 5 OS=Arabidopsis thaliana OX=3702 GN=CHR5 PE=1 SV=1	L	Replication, recombination and repair	SWI/SNF-related matrix-associated actin-dependent regulator of chromatin subfamily A-like protein 1 [Quercus suber]	molecular function: binding (GO:0005488);; molecular function: catalytic activity (GO:0003824)
EVM0019121	EVM0019121	11.7938	17.0776	14.0064	0.00319728	1.14011	up	9.64265e-11	1.0058	up	0.990278	0.143574	normal	--	--	Cellular Component: integral component of membrane (GO:0016021);;	K20283|0|pper:PRUPE_ppa000287mg|K20283 golgin subfamily A member 4 | (RefSeq) hypothetical protein	--	--	--	--	--	S	Function unknown	hypothetical protein CFP56_37552 [Quercus suber]	cellular component: membrane (GO:0016020);; cellular component: membrane part (GO:0044425)
EVM0017414	EVM0017414	43.4153	21.9374	9.47846	1.52715e-09	-1.41672	down	0.0161647	-0.513752	normal	0.591176	-0.761314	normal	--	--	Cellular Component: integral component of membrane (GO:0016021);; Molecular Function: transmembrane transporter activity (GO:0022857);; Biological Process: transmembrane transport (GO:0055085);;	--	--	--	--	EamA-like transporter family	WAT1-related protein At5g40230 OS=Arabidopsis thaliana OX=3702 GN=At5g40230 PE=3 SV=1	S	Function unknown	WAT1-related protein At3g28050-like [Quercus suber]	cellular component: membrane (GO:0016020);; cellular component: membrane part (GO:0044425);; molecular function: transporter activity (GO:0005215);; biological process: localization (GO:0051179)
EVM0013004	EVM0013004	14.4009	2.06227	1.86523	4.70228e-20	-2.11224	down	2.11981e-14	-2.30918	down	0.991644	0.171045	normal	[T]	Signal transduction mechanisms	Molecular Function: protein serine/threonine kinase activity (GO:0004674);; Molecular Function: ATP binding (GO:0005524);; Biological Process: protein phosphorylation (GO:0006468);;	--	--	[T]	Signal transduction mechanisms	Protein tyrosine kinase;; Protein kinase domain	Integrin-linked protein kinase 1 OS=Arabidopsis thaliana OX=3702 GN=ILK1 PE=1 SV=1	T	Signal transduction mechanisms	integrin-linked protein kinase 1 isoform X1 [Quercus suber]	molecular function: catalytic activity (GO:0003824);; biological process: metabolic process (GO:0008152);; biological process: cellular process (GO:0009987);; molecular function: binding (GO:0005488)
EVM0002531	EVM0002531	18.5828	35.1737	34.4457	3.13428e-10	1.74921	up	3.10812e-17	1.38935	up	0.925595	0.350242	normal	--	--	--	--	--	--	--	Protein of unknown function (DUF760)	--	S	Function unknown	uncharacterized protein LOC111986237 [Quercus suber]	--
EVM0017597	EVM0017597	1.35405	0.25109	0.070686	0.000428979	-3.30859	down	0.0193494	-1.83435	normal	--	--	--	--	--	Biological Process: DNA metabolic process (GO:0006259);;	--	--	--	--	Protein of unknown function (DUF295);; F-box domain	F-box protein SKIP23 OS=Arabidopsis thaliana OX=3702 GN=SKIP23 PE=1 SV=1	--	--	F-box protein SKIP23-like [Quercus suber]	biological process: metabolic process (GO:0008152);; biological process: cellular process (GO:0009987)
Castanea_mollissima_newGene_4516	--	1.94164	2.58233	2.91443	6.57731e-05	1.38901	up	0.173169	0.836392	normal	0.957921	0.396202	normal	--	--	--	--	--	--	--	--	--	S	Function unknown	uncharacterized protein LOC112040705 [Quercus suber]	--
EVM0008540	EVM0008540	0.33821	0.828822	1.64469	2.07372e-09	3.06879	up	0.0786443	1.59929	normal	0.728215	0.923971	normal	--	--	--	--	--	--	--	Protein of unknown function (DUF629)	--	--	--	hypothetical protein CFP56_26660 [Quercus suber]	--
EVM0018737	EVM0018737	28.5564	9.56292	7.26704	0.000132586	-1.1005	down	1.11676e-11	-1.10297	down	0.996654	0.0258508	normal	[I]	Lipid transport and metabolism	Biological Process: lipid metabolic process (GO:0006629);; Cellular Component: integral component of membrane (GO:0016021);; Molecular Function: oxidoreductase activity (GO:0016491);; Biological Process: oxidation-reduction process (GO:0055114);;	K13076|0|tcc:TCM_037294|K13076 Delta8-fatty-acid desaturase [EC:1.14.19.4] | (RefSeq) Fatty acid/sphingolipid desaturase	--	[I]	Lipid transport and metabolism	Fatty acid desaturase;; Cytochrome b5-like Heme/Steroid binding domain	Acyl-lipid (9-3)-desaturase OS=Borago officinalis OX=13363 PE=1 SV=1	I	Lipid transport and metabolism	Fatty acid desaturase [Trema orientalis]	biological process: metabolic process (GO:0008152);; biological process: single-organism process (GO:0044699);; cellular component: membrane (GO:0016020);; cellular component: membrane part (GO:0044425);; molecular function: catalytic activity (GO:0003824)
EVM0000727	EVM0000727	31.6469	66.1375	61.172	3.52247e-14	1.80225	up	2.59109e-30	1.53394	up	0.952464	0.272779	normal	--	--	Molecular Function: metal ion binding (GO:0046872);;	K10635|0|pper:PRUPE_ppa002107mg|K10635 E3 ubiquitin-protein ligase Arkadia [EC:2.3.2.27] | (RefSeq) hypothetical protein	--	[O]	Posttranslational modification, protein turnover, chaperones	Ring finger domain;; RING-H2 zinc finger domain;; Zinc finger, C3HC4 type (RING finger);; RING-like zinc finger;; Zinc finger, C3HC4 type (RING finger)	Probable E3 ubiquitin-protein ligase RHG1A OS=Arabidopsis thaliana OX=3702 GN=RHG1A PE=2 SV=1	O	Posttranslational modification, protein turnover, chaperones	probable E3 ubiquitin-protein ligase RHG1A isoform X1 [Quercus suber]	molecular function: binding (GO:0005488)
EVM0003864	EVM0003864	23.7831	41.1043	44.3906	1.16399e-13	1.74834	up	6.80247e-15	1.2583	up	0.83865	0.471438	normal	--	--	Molecular Function: DNA-directed 5'-3' RNA polymerase activity (GO:0003899);; Biological Process: positive regulation of autophagy (GO:0010508);; Biological Process: RNA biosynthetic process (GO:0032774);;	--	--	--	--	Vacuolar sorting 38 and autophagy-related subunit 14	--	S	Function unknown	uncharacterized protein, chloroplastic [Quercus suber]	molecular function: catalytic activity (GO:0003824);; biological process: biological regulation (GO:0065007);; biological process: metabolic process (GO:0008152);; biological process: cellular process (GO:0009987)
EVM0032466	EVM0032466	8.10665	9.75432	14.5353	4.9643e-10	1.69266	up	0.00648869	0.73911	up	0.446754	0.870246	normal	--	--	--	--	--	--	--	TIR domain;; NB-ARC domain;; TIR domain;; NACHT domain;; ATPase family associated with various cellular activities (AAA)	TMV resistance protein N OS=Nicotiana glutinosa OX=35889 GN=N PE=1 SV=1	S	Function unknown	TMV resistance protein N-like [Quercus suber]	--
EVM0018814	EVM0018814	1.1614	4.38479	4.90953	2.26303e-09	2.85352	up	0.00113842	2.26029	up	0.935067	0.433922	normal	--	--	--	--	--	--	--	SnoaL-like domain	--	S	Function unknown	uncharacterized protein LOC112032567 [Quercus suber]	--
EVM0023779	EVM0023779	6.04783	0.499607	0.114893	2.26235e-13	-4.67731	down	2.33552e-09	-2.97767	down	--	--	--	--	--	Cellular Component: nucleus (GO:0005634);; Biological Process: regulation of transcription, DNA-templated (GO:0006355);; Biological Process: auxin-activated signaling pathway (GO:0009734);;	K14484|3.56368e-99|pper:PRUPE_ppa023002mg|K14484 auxin-responsive protein IAA | (RefSeq) hypothetical protein	Plant hormone signal transduction (ko04075)	--	--	AUX/IAA family	Auxin-responsive protein IAA32 OS=Arabidopsis thaliana OX=3702 GN=IAA32 PE=1 SV=2	K	Transcription	auxin-responsive protein IAA32-like [Quercus suber]	cellular component: cell (GO:0005623);; cellular component: organelle (GO:0043226);; cellular component: cell part (GO:0044464);; biological process: biological regulation (GO:0065007);; biological process: cellular process (GO:0009987);; biological process: signaling (GO:0023052);; biological process: single-organism process (GO:0044699);; biological process: response to stimulus (GO:0050896)
EVM0016230	EVM0016230	8.44803	1.34931	0.943812	1.02369e-10	-2.3858	down	7.51032e-16	-2.14563	down	0.993553	-0.140708	normal	--	--	Molecular Function: RNA-directed DNA polymerase activity (GO:0003964);; Biological Process: RNA-dependent DNA biosynthetic process (GO:0006278);; Biological Process: mRNA processing (GO:0006397);;	--	--	[R]	General function prediction only	Type II intron maturase	Nuclear intron maturase 3, mitochondrial OS=Arabidopsis thaliana OX=3702 GN=NMAT3 PE=3 SV=2	L	Replication, recombination and repair	nuclear intron maturase 3, mitochondrial-like [Quercus suber]	molecular function: catalytic activity (GO:0003824);; biological process: metabolic process (GO:0008152);; biological process: cellular process (GO:0009987)
EVM0014475	EVM0014475	7.94627	9.30301	12.03	1.92184e-12	1.42568	up	0.00507526	0.69185	up	0.653384	0.680569	normal	[S]	Function unknown	Cellular Component: membrane (GO:0016020);;	--	--	--	--	Protein of unknown function (DUF1365)	--	S	Function unknown	uncharacterized protein LOC112012929 [Quercus suber]	cellular component: membrane (GO:0016020)
EVM0006240	EVM0006240	5.40316	0.562915	0.542745	0.000208127	-2.40236	down	0.00402471	-2.46246	down	--	--	--	--	--	--	--	--	--	--	Complex 1 protein (LYR family)	LYR motif-containing protein At3g19508 OS=Arabidopsis thaliana OX=3702 GN=At3g19508 PE=3 SV=1	S	Function unknown	LYR motif-containing protein At3g19508 [Quercus suber]	--
EVM0030297	EVM0030297	9.70063	0.426278	0.123189	1.2255e-37	-5.32547	down	1.12559e-27	-3.96688	down	--	--	--	[IQ]	Lipid transport and metabolism;; Secondary metabolites biosynthesis, transport and catabolism	Cellular Component: integral component of membrane (GO:0016021);; Molecular Function: ligase activity (GO:0016874);; Molecular Function: Photinus-luciferin 4-monooxygenase (ATP-hydrolyzing) activity (GO:0047077);; Biological Process: oxidation-reduction process (GO:0055114);;	K10526|0|pmum:103331482|K10526 OPC-8:0 CoA ligase 1 [EC:6.2.1.-] | (RefSeq) 4-coumarate--CoA ligase-like 5	alpha-Linolenic acid metabolism (ko00592)	[I]	Lipid transport and metabolism	AMP-binding enzyme;; AMP-binding enzyme C-terminal domain	4-coumarate--CoA ligase-like 5 OS=Arabidopsis thaliana OX=3702 GN=4CLL5 PE=1 SV=2	IQ	Lipid transport and metabolism;; Secondary metabolites biosynthesis, transport and catabolism	4-coumarate--CoA ligase-like 5 [Quercus suber]	cellular component: membrane (GO:0016020);; cellular component: membrane part (GO:0044425);; molecular function: catalytic activity (GO:0003824);; biological process: metabolic process (GO:0008152);; biological process: single-organism process (GO:0044699)
Castanea_mollissima_newGene_6596	--	5.50232	1.34622	0.630279	6.52009e-06	-2.25938	down	0.00663078	-1.50245	down	0.971405	-0.358151	normal	[O]	Posttranslational modification, protein turnover, chaperones	Molecular Function: ATP binding (GO:0005524);; Biological Process: protein folding (GO:0006457);; Molecular Function: unfolded protein binding (GO:0051082);;	K03283|6.34217e-34|bna:106373152|K03283 heat shock 70kDa protein 1/8 | (RefSeq) heat shock 70 kDa protein 6, chloroplastic-like	--	[O]	Posttranslational modification, protein turnover, chaperones	Hsp70 protein;; Hsp70 protein	Stromal 70 kDa heat shock-related protein, chloroplastic (Fragment) OS=Spinacia oleracea OX=3562 GN=CHSP70 PE=2 SV=1	O	Posttranslational modification, protein turnover, chaperones	stromal 70 kDa heat shock-related protein, chloroplastic-like [Quercus suber]	molecular function: binding (GO:0005488);; biological process: cellular process (GO:0009987)
EVM0013635	EVM0013635	3.52885	0.465207	0.11026	3.47803e-05	-3.71135	down	9.09441e-05	-2.33292	down	--	--	--	--	--	--	--	--	--	--	Spo12 family	--	S	Function unknown	hypothetical protein CFP56_32857 [Quercus suber]	--
EVM0012661	EVM0012661	3.1214	0.116309	0.124653	1.67447e-15	-3.69567	down	4.27556e-12	-4.00805	down	--	--	--	--	--	--	--	--	--	--	Transferase family	Uncharacterized acetyltransferase At3g50280 OS=Arabidopsis thaliana OX=3702 GN=At3g50280 PE=3 SV=1	S	Function unknown	uncharacterized acetyltransferase At3g50280-like [Quercus suber]	--
EVM0004595	EVM0004595	1.95882	0.135222	0.104306	1.73015e-05	-3.12056	down	1.39281e-10	-3.24253	down	--	--	--	[T]	Signal transduction mechanisms	--	--	--	[R]	General function prediction only	PIN domain;; FHA domain;; Inner membrane component of T3SS, cytoplasmic domain	FHA domain-containing protein PS1 OS=Arabidopsis thaliana OX=3702 GN=PS1 PE=2 SV=1	T	Signal transduction mechanisms	FHA domain-containing protein PS1 isoform X1 [Quercus suber]	--
EVM0031658	EVM0031658	24.2978	6.66444	5.27757	4.26651e-07	-1.34462	down	3.51291e-11	-1.38828	down	0.995111	0.0659622	normal	--	--	Molecular Function: transcription factor activity, sequence-specific DNA binding (GO:0003700);; Cellular Component: nucleus (GO:0005634);; Biological Process: regulation of transcription, DNA-templated (GO:0006355);; Biological Process: cell differentiation (GO:0030154);; Molecular Function: sequence-specific DNA binding (GO:0043565);; Biological Process: regulation of shoot system development (G…	--	--	--	--	GRAS domain family	Scarecrow-like protein 15 OS=Arabidopsis thaliana OX=3702 GN=SCL15 PE=1 SV=3	K	Transcription	scarecrow-like protein 15 [Quercus suber]	molecular function: nucleic acid binding transcription factor activity (GO:0001071);; biological process: biological regulation (GO:0065007);; cellular component: cell (GO:0005623);; cellular component: organelle (GO:0043226);; cellular component: cell part (GO:0044464);; biological process: cellular process (GO:0009987);; biological process: developmental process (GO:0032502);; biological proces…
EVM0001488	EVM0001488	19.5253	27.3934	26.4131	3.54972e-12	1.24845	up	1.1384e-05	0.956597	up	0.944317	0.295203	normal	--	--	Molecular Function: transferase activity (GO:0016740);;	--	--	[S]	Function unknown	Tetratricopeptide repeat;; Tetratricopeptide repeat;; Tetratricopeptide repeat	--	S	Function unknown	ER membrane protein complex subunit 2-like [Quercus suber]	molecular function: catalytic activity (GO:0003824)
EVM0014916	EVM0014916	14.0687	4.93301	2.80722	2.54145e-06	-1.56237	down	1.44933e-05	-1.03102	down	0.946244	-0.39408	normal	[R]	General function prediction only	--	--	--	[R]	General function prediction only	WD domain, G-beta repeat;; Anaphase-promoting complex subunit 4 WD40 domain	Katanin p80 WD40 repeat-containing subunit B1 homolog OS=Arabidopsis thaliana OX=3702 GN=At5g23430 PE=2 SV=3	S	Function unknown	telomerase Cajal body protein 1-like [Quercus suber]	--
EVM0025051	EVM0025051	40.1804	11.78	8.34528	2.40924e-09	-1.41087	down	1.08072e-13	-1.29283	down	0.994485	-0.0753533	normal	--	--	Cellular Component: plasma membrane (GO:0005886);; Cellular Component: integral component of membrane (GO:0016021);; Molecular Function: transmembrane transporter activity (GO:0022857);; Biological Process: transmembrane transport (GO:0055085);;	--	--	--	--	--	Uncharacterized protein At4g15545 OS=Arabidopsis thaliana OX=3702 GN=At4g15545 PE=1 SV=1	S	Function unknown	uncharacterized protein At4g15545 [Quercus suber]	cellular component: cell (GO:0005623);; cellular component: membrane (GO:0016020);; cellular component: cell part (GO:0044464);; cellular component: membrane part (GO:0044425);; molecular function: transporter activity (GO:0005215);; biological process: localization (GO:0051179)
EVM0007099	EVM0007099	5.79458	2.2871	1.55236	3.4484e-06	-1.06198	down	0.00205902	-0.859596	down	0.993553	-0.126429	normal	--	--	--	--	--	--	--	F-box domain;; F-box associated domain;; F-box-like	F-box/kelch-repeat protein At3g06240 OS=Arabidopsis thaliana OX=3702 GN=At3g06240 PE=2 SV=1	S	Function unknown	F-box/kelch-repeat protein At3g06240-like [Quercus suber]	--
EVM0006908	EVM0006908	3.60705	1.07856	0.041006	2.73893e-11	-5.14777	down	0.0110299	-1.21707	normal	0.512136	-1.15925	normal	--	--	--	--	--	--	--	--	--	S	Function unknown	uncharacterized protein LOC111987660 [Quercus suber]	--
EVM0005799	EVM0005799	46.0113	1.31101	0.297073	4.73845e-121	-6.39971	down	2.29421e-91	-4.62536	down	0.492135	-1.20263	normal	[K]	Transcription	Molecular Function: protein serine/threonine kinase activity (GO:0004674);; Molecular Function: ATP binding (GO:0005524);; Biological Process: protein phosphorylation (GO:0006468);; Cellular Component: integral component of membrane (GO:0016021);;	K20718|0|tcc:TCM_015008|K20718 LRR receptor-like serine/threonine-protein kinase ERECTA [EC:2.7.11.1] | (RefSeq) ERECTA-like 1	--	--	--	Protein kinase domain;; Leucine rich repeat;; Protein tyrosine kinase;; Leucine Rich repeats (2 copies);; Leucine Rich Repeat;; Leucine rich repeat N-terminal domain	LRR receptor-like serine/threonine-protein kinase ERL1 OS=Arabidopsis thaliana OX=3702 GN=ERL1 PE=1 SV=1	S	Function unknown	LRR receptor-like serine/threonine-protein kinase ERL1 isoform X1 [Quercus suber]	molecular function: catalytic activity (GO:0003824);; biological process: metabolic process (GO:0008152);; biological process: cellular process (GO:0009987);; molecular function: binding (GO:0005488);; cellular component: membrane (GO:0016020);; cellular component: membrane part (GO:0044425)
EVM0022792	EVM0022792	24.5271	9.08831	6.33268	3.71472e-06	-1.11559	down	0.000280123	-0.954483	down	0.993851	-0.100994	normal	--	--	Biological Process: mRNA splicing, via spliceosome (GO:0000398);; Cellular Component: spliceosomal complex (GO:0005681);;	K12873|1.22348e-95|jcu:105629467|K12873 bud site selection protein 31 | (RefSeq) protein BUD31 homolog 2	Spliceosome (ko03040)	[K]	Transcription	G10 protein	Protein BUD31 homolog 1 OS=Oryza sativa subsp. japonica OX=39947 GN=Os01g0857700 PE=2 SV=1	DK	Cell cycle control, cell division, chromosome partitioning;; Transcription	protein bud31 like 1 [Quercus suber]	biological process: metabolic process (GO:0008152);; biological process: cellular process (GO:0009987);; cellular component: cell (GO:0005623);; cellular component: macromolecular complex (GO:0032991);; cellular component: organelle (GO:0043226);; cellular component: organelle part (GO:0044422);; cellular component: cell part (GO:0044464)
EVM0011856	EVM0011856	1.56219	308.281	1085.73	4.87046e-104	10.2202	up	2.77362e-183	8.02507	up	0.00312048	1.97392	up	--	--	Molecular Function: nutrient reservoir activity (GO:0045735);;	--	--	--	--	Cupin	Glutelin type-A 3 OS=Oryza sativa subsp. japonica OX=39947 GN=GLUA3 PE=2 SV=2	S	Function unknown	11S globulin seed storage protein 2-like isoform X1 [Quercus suber]	molecular function: nutrient reservoir activity (GO:0045735)
EVM0003850	EVM0003850	2.92831	10.3182	23.4253	2.29582e-23	3.86521	up	2.95554e-16	2.27485	up	0.0664575	1.42268	normal	[P]	Inorganic ion transport and metabolism	Molecular Function: solute:proton antiporter activity (GO:0015299);; Cellular Component: integral component of membrane (GO:0016021);; Biological Process: hydrogen ion transmembrane transport (GO:1902600);;	--	--	[P]	Inorganic ion transport and metabolism	Sodium/hydrogen exchanger family;; Universal stress protein family;; Sodium/hydrogen exchanger family	Cation/H(+) antiporter 18 OS=Arabidopsis thaliana OX=3702 GN=CHX18 PE=2 SV=1	P	Inorganic ion transport and metabolism	cation/H(+) antiporter 18-like [Quercus suber]	molecular function: transporter activity (GO:0005215);; biological process: single-organism process (GO:0044699);; biological process: localization (GO:0051179);; cellular component: membrane (GO:0016020);; cellular component: membrane part (GO:0044425)
EVM0007349	EVM0007349	68.8964	28.8486	18.3271	7.74071e-08	-1.11643	down	0.000524748	-0.783848	down	0.959767	-0.262163	normal	[IQR]	Lipid transport and metabolism;; Secondary metabolites biosynthesis, transport and catabolism;; General function prediction only	Molecular Function: oxidoreductase activity (GO:0016491);; Biological Process: oxidation-reduction process (GO:0055114);;	--	--	[R]	General function prediction only	Enoyl-(Acyl carrier protein) reductase;; short chain dehydrogenase;; KR domain	(-)-isopiperitenol/(-)-carveol dehydrogenase, mitochondrial OS=Mentha piperita OX=34256 PE=1 SV=1	S	Function unknown	(-)-isopiperitenol/(-)-carveol dehydrogenase, mitochondrial-like [Quercus suber]	molecular function: catalytic activity (GO:0003824);; biological process: metabolic process (GO:0008152);; biological process: single-organism process (GO:0044699)
EVM0021484	EVM0021484	17.4289	4.37343	1.32787	8.83851e-64	-2.90122	down	6.84173e-17	-1.5184	down	0.343436	-1.12516	normal	--	--	--	--	--	--	--	QWRF family	QWRF motif-containing protein 2 OS=Arabidopsis thaliana OX=3702 GN=QWRF2 PE=2 SV=1	S	Function unknown	QWRF motif-containing protein 2 [Quercus suber]	--
EVM0012611	EVM0012611	28.8087	40.3017	43.169	2.03189e-16	1.41778	up	2.39086e-12	0.955738	up	0.833158	0.452664	normal	[T]	Signal transduction mechanisms	Molecular Function: phosphoprotein phosphatase activity (GO:0004721);; Biological Process: protein dephosphorylation (GO:0006470);; Biological Process: brassinosteroid mediated signaling pathway (GO:0009742);; Molecular Function: metal ion binding (GO:0046872);;	K01090|0|tcc:TCM_004502|K01090 protein phosphatase [EC:3.1.3.16] | (RefSeq) BRI1 suppressor 1 (BSU1)-like 1	--	[R]	General function prediction only	Calcineurin-like phosphoesterase;; Galactose oxidase, central domain;; Galactose oxidase, central domain;; Kelch motif;; Kelch motif;; Kelch motif;; Kelch motif;; Serine-threonine protein phosphatase N-terminal domain	Serine/threonine-protein phosphatase BSL1 OS=Arabidopsis thaliana OX=3702 GN=BSL1 PE=1 SV=2	T	Signal transduction mechanisms	serine/threonine-protein phosphatase BSL1 isoform X1 [Quercus suber]	molecular function: catalytic activity (GO:0003824);; biological process: metabolic process (GO:0008152);; biological process: cellular process (GO:0009987);; biological process: signaling (GO:0023052);; biological process: single-organism process (GO:0044699);; biological process: response to stimulus (GO:0050896);; biological process: biological regulation (GO:0065007);; molecular function: bin…
EVM0013727	EVM0013727	6.91733	1.49057	0.553843	3.33781e-24	-2.80987	down	6.38297e-09	-1.72072	down	0.874928	-0.689507	normal	[O]	Posttranslational modification, protein turnover, chaperones	Molecular Function: nucleotide binding (GO:0000166);; Molecular Function: DNA binding (GO:0003677);;	K04485|0|cic:CICLE_v10025165mg|K04485 DNA repair protein RadA/Sms | (RefSeq) hypothetical protein	--	--	--	AAA domain;; KaiC	--	O	Posttranslational modification, protein turnover, chaperones	uncharacterized protein LOC112023714 isoform X1 [Quercus suber]	molecular function: binding (GO:0005488)
EVM0020551	EVM0020551	28.7775	10.1673	5.28325	1.96886e-10	-1.66859	down	6.05189e-07	-1.02018	down	0.880185	-0.515211	normal	--	--	Molecular Function: aspartic-type endopeptidase activity (GO:0004190);; Biological Process: proteolysis (GO:0006508);; Biological Process: protein catabolic process (GO:0030163);; Cellular Component: anchored component of plasma membrane (GO:0046658);;	--	--	[O]	Posttranslational modification, protein turnover, chaperones	Xylanase inhibitor N-terminal;; Eukaryotic aspartyl protease;; Xylanase inhibitor C-terminal	Aspartic proteinase-like protein 1 OS=Arabidopsis thaliana OX=3702 GN=At5g10080 PE=1 SV=1	O	Posttranslational modification, protein turnover, chaperones	aspartic proteinase-like protein 1 isoform X1 [Quercus suber]	molecular function: catalytic activity (GO:0003824);; biological process: metabolic process (GO:0008152);; cellular component: cell (GO:0005623);; cellular component: membrane (GO:0016020);; cellular component: membrane part (GO:0044425);; cellular component: cell part (GO:0044464)
EVM0013561	EVM0013561	14.1261	2.36508	1.45912	3.36597e-23	-2.42708	down	1.4544e-16	-2.08484	down	0.987509	-0.220735	normal	--	--	--	--	--	--	--	F-box associated domain;; F-box associated	F-box protein At5g65850 OS=Arabidopsis thaliana OX=3702 GN=At5g65850 PE=2 SV=1	--	--	putative F-box protein At1g32660 [Quercus suber]	--
Castanea_mollissima_newGene_6453	--	0.899524	3.37863	2.85318	8.84468e-08	2.48817	up	0.000205327	2.27515	up	0.993553	0.13284	normal	--	--	--	--	--	--	--	--	--	L	Replication, recombination and repair	exonuclease dpd1, chloroplastic/mitochondrial [Quercus suber]	--
EVM0007262	EVM0007262	252.539	1990.82	2396.37	3.31392e-58	4.09166	up	1.15509e-108	3.443	up	0.658354	0.620426	normal	[O]	Posttranslational modification, protein turnover, chaperones	Molecular Function: cysteine-type endopeptidase activity (GO:0004197);; Cellular Component: extracellular space (GO:0005615);; Cellular Component: lysosome (GO:0005764);; Molecular Function: 2-alkenal reductase [NAD(P)] activity (GO:0032440);; Biological Process: proteolysis involved in cellular protein catabolic process (GO:0051603);; Biological Process: oxidation-reduction process (GO:0055114);;	--	--	[O]	Posttranslational modification, protein turnover, chaperones	Papain family cysteine protease;; Cathepsin propeptide inhibitor domain (I29);; Granulin	Cysteine proteinase RD21A OS=Arabidopsis thaliana OX=3702 GN=RD21A PE=1 SV=1	O	Posttranslational modification, protein turnover, chaperones	low-temperature-induced cysteine proteinase-like [Quercus suber]	molecular function: catalytic activity (GO:0003824);; biological process: metabolic process (GO:0008152);; cellular component: extracellular region (GO:0005576);; cellular component: extracellular region part (GO:0044421);; cellular component: cell (GO:0005623);; cellular component: organelle (GO:0043226);; cellular component: cell part (GO:0044464);; biological process: single-organism process (…
EVM0027143	EVM0027143	1.07666	0.02777	0.0107485	1.44453e-06	-4.86944	down	2.49765e-05	-4.1275	down	--	--	--	--	--	--	--	--	--	--	--	Alpha-crystallin domain-containing protein 22.3 OS=Arabidopsis thaliana OX=3702 GN=ACD22.3 PE=1 SV=1	S	Function unknown	increased DNA methylation 2-like [Quercus suber]	--
EVM0011790	EVM0011790	28.3204	11.3572	8.3092	0.0318924	-0.872883	normal	0.00674906	-0.837981	down	0.999947	-0.00689515	normal	--	--	--	--	--	--	--	cAMP-regulated phosphoprotein/endosulfine conserved region	--	S	Function unknown	uncharacterized protein LOC112007330 isoform X1 [Quercus suber]	--
EVM0008661	EVM0008661	0.0974933	4.37399	18.607	5.82814e-06	7.10372	up	0.0153272	3.82667	normal	0.0715593	1.88118	normal	[D]	Cell cycle control, cell division, chromosome partitioning	Molecular Function: ubiquitin-protein transferase activity (GO:0004842);; Biological Process: protein ubiquitination (GO:0016567);;	--	--	--	--	U-box domain	U-box domain-containing protein 21 OS=Arabidopsis thaliana OX=3702 GN=PUB21 PE=2 SV=1	O	Posttranslational modification, protein turnover, chaperones	U-box domain-containing protein 21-like [Quercus suber]	molecular function: catalytic activity (GO:0003824);; biological process: metabolic process (GO:0008152);; biological process: cellular process (GO:0009987)
EVM0028617	EVM0028617	25.7446	78.928	54.6854	6.94951e-20	1.85949	up	1.45359e-43	2.08458	up	0.982718	-0.166339	normal	[G]	Carbohydrate transport and metabolism	Molecular Function: transporter activity (GO:0005215);; Biological Process: transport (GO:0006810);; Cellular Component: integral component of membrane (GO:0016021);;	K09872|0|gra:105789119|K09872 aquaporin PIP | (RefSeq) aquaporin PIP1-3	--	[G]	Carbohydrate transport and metabolism	Major intrinsic protein	Probable aquaporin PIP1-4 OS=Arabidopsis thaliana OX=3702 GN=PIP1.4 PE=1 SV=1	G	Carbohydrate transport and metabolism	aquaporin PIP1-3-like [Quercus suber]	molecular function: transporter activity (GO:0005215);; biological process: localization (GO:0051179);; cellular component: membrane (GO:0016020);; cellular component: membrane part (GO:0044425)
EVM0013964	EVM0013964	3.12134	86.5984	63.4555	2.86512e-20	5.10994	up	3.82185e-07	4.76609	up	0.996649	-0.0278315	normal	[G]	Carbohydrate transport and metabolism	Molecular Function: pectate lyase activity (GO:0030570);; Biological Process: pectin catabolic process (GO:0045490);; Molecular Function: metal ion binding (GO:0046872);;	K01728|0|pop:POPTR_0002s23990g|K01728 pectate lyase [EC:4.2.2.2] | (RefSeq) POPTRDRAFT_409041; hypothetical protein	Pentose and glucuronate interconversions (ko00040)	--	--	Pectate lyase;; Right handed beta helix region	Probable pectate lyase 8 OS=Arabidopsis thaliana OX=3702 GN=At3g07010 PE=2 SV=1	G	Carbohydrate transport and metabolism	probable pectate lyase 8 [Quercus suber]	molecular function: catalytic activity (GO:0003824);; biological process: metabolic process (GO:0008152);; molecular function: binding (GO:0005488)
EVM0016662	EVM0016662	10.6827	2.8778	0.559782	1.44323e-15	-3.46598	down	2.77877e-09	-1.40727	down	0.364791	-1.39101	normal	--	--	--	--	--	--	--	Myb-like DNA-binding domain	--	S	Function unknown	uncharacterized protein LOC112009918 [Quercus suber]	--
EVM0008886	EVM0008886	17.4779	4.83941	2.00234	8.68954e-42	-2.32315	down	6.08722e-15	-1.37371	down	0.667949	-0.771684	normal	--	--	Cellular Component: membrane (GO:0016020);;	--	--	--	--	--	--	S	Function unknown	myb-like protein X [Quercus suber]	cellular component: membrane (GO:0016020)
EVM0011122	EVM0011122	15.311	7.38822	1.8173	3.66299e-12	-2.31288	down	0.00315113	-0.572876	normal	0.0875522	-1.46235	normal	[K]	Transcription	--	--	--	[T]	Signal transduction mechanisms	NB-ARC domain;; Leucine rich repeat;; AAA domain	Disease resistance protein At4g27190 OS=Arabidopsis thaliana OX=3702 GN=At4g27190 PE=2 SV=1	S	Function unknown	probable disease resistance protein At4g27220 [Quercus suber]	--
EVM0019862	EVM0019862	16.0001	22.8265	31.29	1.63842e-12	1.8214	up	2.28531e-07	0.983878	up	0.512012	0.778537	normal	--	--	--	--	--	--	--	GRAM domain	GLABRA2 expression modulator OS=Arabidopsis thaliana OX=3702 GN=GEM PE=1 SV=1	S	Function unknown	GLABRA2 expression modulator-like [Quercus suber]	--
EVM0004300	EVM0004300	4.5452	0.381367	0.071076	2.34129e-20	-5.09187	down	6.46344e-12	-3.0202	down	--	--	--	[G]	Carbohydrate transport and metabolism	Biological Process: flavonoid biosynthetic process (GO:0009813);; Cellular Component: intracellular membrane-bounded organelle (GO:0043231);; Biological Process: flavonoid glucuronidation (GO:0052696);; Molecular Function: quercetin 3-O-glucosyltransferase activity (GO:0080043);; Molecular Function: quercetin 7-O-glucosyltransferase activity (GO:0080044);;	--	--	[GC]	Carbohydrate transport and metabolism;; Energy production and conversion	UDP-glucoronosyl and UDP-glucosyl transferase	UDP-glycosyltransferase 87A2 OS=Arabidopsis thaliana OX=3702 GN=UGT87A2 PE=1 SV=1	S	Function unknown	udp-glycosyltransferase 87a2 [Quercus suber]	biological process: metabolic process (GO:0008152);; cellular component: cell (GO:0005623);; cellular component: organelle (GO:0043226);; cellular component: cell part (GO:0044464);; biological process: cellular process (GO:0009987);; biological process: single-organism process (GO:0044699);; molecular function: catalytic activity (GO:0003824)
EVM0021272	EVM0021272	0.271597	4.43142	7.9961	1.12837e-25	5.64873	up	8.23129e-14	4.29937	up	0.407168	1.07334	normal	--	--	--	K14016|3.53209e-98|fve:101292678|K14016 ubiquitin fusion degradation protein 1 | (RefSeq) ubiquitin fusion degradation protein 1 homolog	Protein processing in endoplasmic reticulum (ko04141)	[O]	Posttranslational modification, protein turnover, chaperones	Ubiquitin fusion degradation protein UFD1	--	O	Posttranslational modification, protein turnover, chaperones	ubiquitin fusion degradation protein 1 homolog [Quercus suber]	--
EVM0033429	EVM0033429	0.629414	0.734414	0.0338005	0.00189057	-3.13144	down	0.44294	0.639744	normal	0.53329	-1.11195	normal	--	--	--	--	--	--	--	Lipase (class 3)	Senescence-associated carboxylesterase 101 OS=Arabidopsis thaliana OX=3702 GN=SAG101 PE=1 SV=1	S	Function unknown	senescence-associated carboxylesterase 101-like [Quercus suber]	--
EVM0019962	EVM0019962	16.7833	0.087366	0.0164825	1.99476e-21	-8.35037	down	8.23962e-28	-6.6428	down	--	--	--	--	--	--	--	--	--	--	--	Probable protein ABIL5 OS=Oryza sativa subsp. japonica OX=39947 GN=Os01g0760900 PE=2 SV=1	S	Function unknown	probable protein ABIL5 [Quercus suber]	--
EVM0000387	EVM0000387	2.06248	0.233859	0	9.7024e-06	-7.17529	down	0.000228769	-2.52893	down	--	--	--	--	--	--	K01047|6.69991e-58|tcc:TCM_039586|K01047 secretory phospholipase A2 [EC:3.1.1.4] | (RefSeq) Phospholipase A21	Glycerophospholipid metabolism (ko00564);; Ether lipid metabolism (ko00565);; Arachidonic acid metabolism (ko00590);; Linoleic acid metabolism (ko00591);; alpha-Linolenic acid metabolism (ko00592)	--	--	--	Phospholipase A2-alpha OS=Arabidopsis thaliana OX=3702 GN=PLA2-ALPHA PE=1 SV=1	I	Lipid transport and metabolism	phospholipase A2-alpha [Quercus suber]	--
EVM0009120	EVM0009120	6.11171	2.54074	1.56784	0.000475684	-1.1916	down	0.0251424	-0.779283	normal	0.98068	-0.267442	normal	--	--	--	--	--	[R]	General function prediction only	--	--	S	Function unknown	uncharacterized protein LOC111991384 [Quercus suber]	--
EVM0003450	EVM0003450	14.2929	4.28029	1.67587	1.35708e-25	-2.28897	down	4.02262e-09	-1.25795	down	0.681414	-0.812908	normal	--	--	Biological Process: microtubule cytoskeleton organization (GO:0000226);; Biological Process: cytokinesis (GO:0000910);; Molecular Function: microtubule binding (GO:0008017);;	K16732|0|cit:102623115|K16732 protein regulator of cytokinesis 1 | (RefSeq) 65-kDa microtubule-associated protein 3	--	[DZ]	Cell cycle control, cell division, chromosome partitioning;; Cytoskeleton	Microtubule associated protein (MAP65/ASE1 family)	65-kDa microtubule-associated protein 3 OS=Arabidopsis thaliana OX=3702 GN=MAP65-3 PE=1 SV=1	S	Function unknown	65-kDa microtubule-associated protein 3 [Quercus suber]	biological process: cellular process (GO:0009987);; biological process: cellular component organization or biogenesis (GO:0071840);; biological process: single-organism process (GO:0044699);; molecular function: binding (GO:0005488)
EVM0031494	EVM0031494	19.1894	6.03169	2.356	1.38741e-45	-2.21312	down	8.00795e-11	-1.19278	down	0.624527	-0.826353	normal	--	--	--	--	--	--	--	Filament-like plant protein, long coiled-coil	Filament-like plant protein (Fragment) OS=Solanum lycopersicum OX=4081 GN=FPP PE=1 SV=1	S	Function unknown	filament-like plant protein isoform X2 [Quercus suber]	--
EVM0033365	EVM0033365	643.894	189.361	48.9644	6.0821e-42	-2.90791	down	1.39677e-08	-1.29152	down	0.0122831	-1.45096	normal	--	--	Molecular Function: aspartic-type endopeptidase activity (GO:0004190);; Cellular Component: endoplasmic reticulum (GO:0005783);; Biological Process: proteolysis (GO:0006508);; Biological Process: response to water deprivation (GO:0009414);; Biological Process: systemic acquired resistance (GO:0009627);; Biological Process: response to abscisic acid (GO:0009737);;	--	--	[O]	Posttranslational modification, protein turnover, chaperones	Xylanase inhibitor N-terminal;; Xylanase inhibitor C-terminal;; Eukaryotic aspartyl protease	Protein ASPARTIC PROTEASE IN GUARD CELL 1 OS=Arabidopsis thaliana OX=3702 GN=ASPG1 PE=1 SV=1	O	Posttranslational modification, protein turnover, chaperones	protein ASPARTIC PROTEASE IN GUARD CELL 1 [Quercus suber]	molecular function: catalytic activity (GO:0003824);; biological process: metabolic process (GO:0008152);; cellular component: cell (GO:0005623);; cellular component: organelle (GO:0043226);; cellular component: cell part (GO:0044464);; biological process: response to stimulus (GO:0050896);; biological process: immune system process (GO:0002376);; biological process: multi-organism process (GO:00…
Castanea_mollissima_newGene_1197	--	1.03742	2.0701	1.42549	0.000205094	1.32266	up	0.0935525	0.847808	normal	0.944842	0.401327	normal	--	--	--	--	--	--	--	--	--	--	--	hypothetical protein CFP56_15717 [Quercus suber]	--
EVM0022681	EVM0022681	17.6455	8.6837	2.44073	1.79853e-13	-2.07174	down	0.0211288	-0.541571	normal	0.174754	-1.28135	normal	[NW]	Cell motility;; Extracellular structures	--	--	--	--	--	Protein tyrosine kinase;; Protein kinase domain;; D-mannose binding lectin;; PAN-like domain;; S-locus glycoprotein domain;; Domain of unknown function (DUF3403)	G-type lectin S-receptor-like serine/threonine-protein kinase RKS1 OS=Arabidopsis thaliana OX=3702 GN=RKS1 PE=3 SV=3	T	Signal transduction mechanisms	G-type lectin S-receptor-like serine/threonine-protein kinase RKS1 [Quercus suber]	--
EVM0014043	EVM0014043	52.0127	18.7642	7.36035	9.28636e-26	-2.00732	down	1.86004e-06	-0.98919	down	0.407717	-0.875571	normal	[R]	General function prediction only	--	--	--	--	--	Anaphase-promoting complex subunit 4 WD40 domain;; WD domain, G-beta repeat	COMPASS-like H3K4 histone methylase component WDR5A OS=Arabidopsis thaliana OX=3702 GN=WDR5A PE=1 SV=1	S	Function unknown	uncharacterized WD repeat-containing protein C2A9.03 isoform X1 [Quercus suber]	--
EVM0013037	EVM0013037	4.18454	1.20537	0.632732	1.35448e-10	-1.86474	down	0.000367127	-1.29648	down	0.976107	-0.320856	normal	--	--	Cellular Component: endosome (GO:0005768);; Cellular Component: vacuolar membrane (GO:0005774);; Cellular Component: trans-Golgi network (GO:0005802);; Molecular Function: S-adenosylmethionine-dependent methyltransferase activity (GO:0008757);; Cellular Component: integral component of membrane (GO:0016021);; Biological Process: methylation (GO:0032259);;	--	--	--	--	Putative S-adenosyl-L-methionine-dependent methyltransferase;; Methyltransferase domain	Probable methyltransferase PMT23 OS=Arabidopsis thaliana OX=3702 GN=At2g40280 PE=2 SV=2	S	Function unknown	probable methyltransferase PMT23 [Quercus suber]	cellular component: cell (GO:0005623);; cellular component: organelle (GO:0043226);; cellular component: cell part (GO:0044464);; cellular component: membrane (GO:0016020);; cellular component: organelle part (GO:0044422);; molecular function: catalytic activity (GO:0003824);; biological process: metabolic process (GO:0008152);; cellular component: membrane part (GO:0044425)
EVM0005015	EVM0005015	10.3043	0.160688	0	4.69536e-10	-9.18338	down	1.39696e-19	-5.29145	down	--	--	--	--	--	Cellular Component: plasma membrane (GO:0005886);; Cellular Component: plant-type vacuole membrane (GO:0009705);; Biological Process: unidimensional cell growth (GO:0009826);; Biological Process: plant-type secondary cell wall biogenesis (GO:0009834);; Biological Process: auxin efflux (GO:0010315);; Cellular Component: integral component of membrane (GO:0016021);; Molecular Function: transmembran…	--	--	--	--	EamA-like transporter family	Protein WALLS ARE THIN 1 OS=Arabidopsis thaliana OX=3702 GN=WAT1 PE=1 SV=1	U	Intracellular trafficking, secretion, and vesicular transport	protein WALLS ARE THIN 1-like [Quercus suber]	cellular component: cell (GO:0005623);; cellular component: membrane (GO:0016020);; cellular component: cell part (GO:0044464);; cellular component: organelle (GO:0043226);; cellular component: organelle part (GO:0044422);; biological process: cellular process (GO:0009987);; biological process: developmental process (GO:0032502);; biological process: growth (GO:0040007);; biological process: sing…
EVM0021769	EVM0021769	1.30678	0	0	2.94732e-05	-6.91711	down	1.71741e-05	-5.56425	down	--	--	--	[K]	Transcription	Cellular Component: membrane (GO:0016020);; Molecular Function: kinase activity (GO:0016301);; Biological Process: phosphorylation (GO:0016310);;	--	--	[R]	General function prediction only	Leucine rich repeat;; Leucine Rich repeats (2 copies);; Leucine Rich Repeat;; Leucine Rich repeat	Receptor like protein 29 OS=Arabidopsis thaliana OX=3702 GN=RLP29 PE=2 SV=1	S	Function unknown	piriformospora indica-insensitive protein 2-like isoform X1 [Quercus suber]	cellular component: membrane (GO:0016020);; molecular function: catalytic activity (GO:0003824);; biological process: metabolic process (GO:0008152);; biological process: cellular process (GO:0009987)
Castanea_mollissima_newGene_5851	--	8.32336	3.70816	0.835009	1.71321e-10	-2.50527	down	0.10555	-0.66965	normal	0.558813	-1.16769	normal	--	--	--	--	--	--	--	--	--	--	--	hypothetical protein CFP56_47594 [Quercus suber]	--
EVM0027133	EVM0027133	1.52626	0.163652	0	2.90621e-06	-7.48048	down	8.9097e-05	-2.54283	down	--	--	--	--	--	--	--	--	[T]	Signal transduction mechanisms	NB-ARC domain	Disease resistance protein RGA2 OS=Solanum bulbocastanum OX=147425 GN=RGA2 PE=1 SV=1	S	Function unknown	putative disease resistance protein RGA3 [Quercus suber]	--
EVM0025401	EVM0025401	65.3557	87.6803	82.7855	6.18134e-07	1.18473	up	4.20082e-07	0.890394	up	0.939355	0.296634	normal	--	--	Molecular Function: ubiquitin-protein transferase activity (GO:0004842);; Cellular Component: nucleus (GO:0005634);; Cellular Component: cytoplasm (GO:0005737);; Cellular Component: plasma membrane (GO:0005886);; Biological Process: trichome branching (GO:0010091);; Molecular Function: ligase activity (GO:0016874);; Biological Process: DNA endoreduplication (GO:0042023);; Biological Process: prot…	K10590|0|pper:PRUPE_ppa000080mg|K10590 E3 ubiquitin-protein ligase TRIP12 [EC:2.3.2.26] | (RefSeq) hypothetical protein	Ubiquitin mediated proteolysis (ko04120)	[O]	Posttranslational modification, protein turnover, chaperones	HECT-domain (ubiquitin-transferase);; Armadillo/beta-catenin-like repeat	E3 ubiquitin-protein ligase UPL3 OS=Arabidopsis thaliana OX=3702 GN=UPL3 PE=1 SV=1	O	Posttranslational modification, protein turnover, chaperones	E3 ubiquitin-protein ligase UPL3 [Quercus suber]	molecular function: catalytic activity (GO:0003824);; cellular component: cell (GO:0005623);; cellular component: organelle (GO:0043226);; cellular component: cell part (GO:0044464);; cellular component: membrane (GO:0016020);; biological process: cellular process (GO:0009987);; biological process: developmental process (GO:0032502);; biological process: single-organism process (GO:0044699);; bio…
EVM0019562	EVM0019562	4.08243	1.23654	0.488322	3.0963e-11	-2.26909	down	0.00023978	-1.2405	down	0.902141	-0.635221	normal	[T]	Signal transduction mechanisms	Cellular Component: integral component of membrane (GO:0016021);;	--	--	[R]	General function prediction only	Ankyrin repeats (3 copies);; Domain of unknown function;; Ankyrin repeats (many copies);; Ankyrin repeat;; Ankyrin repeats (many copies);; Ankyrin repeat	Ankyrin repeat-containing protein At2g01680 OS=Arabidopsis thaliana OX=3702 GN=At2g01680 PE=2 SV=1	S	Function unknown	ankyrin repeat-containing protein BDA1-like [Quercus suber]	cellular component: membrane (GO:0016020);; cellular component: membrane part (GO:0044425)
EVM0015315	EVM0015315	16.019	2.60973	1.48214	2.64654e-17	-2.58901	down	3.88678e-10	-2.11839	down	0.974219	-0.306658	normal	[GER]	Carbohydrate transport and metabolism;; Amino acid transport and metabolism;; General function prediction only	Cellular Component: integral component of membrane (GO:0016021);;	--	--	--	--	EamA-like transporter family	--	EG	Amino acid transport and metabolism;; Carbohydrate transport and metabolism	uncharacterized protein LOC112006570 [Quercus suber]	cellular component: membrane (GO:0016020);; cellular component: membrane part (GO:0044425)
EVM0008800	EVM0008800	5.88703	1.05695	0.378282	4.16844e-20	-3.06924	down	1.10764e-08	-1.97496	down	0.888241	-0.670584	normal	--	--	Molecular Function: hydrolase activity (GO:0016787);;	--	--	[M]	Cell wall/membrane/envelope biogenesis	Pectinacetylesterase	Pectin acetylesterase 10 OS=Arabidopsis thaliana OX=3702 GN=PAE10 PE=2 SV=1	S	Function unknown	pectin acetylesterase 10-like isoform X1 [Quercus suber]	molecular function: catalytic activity (GO:0003824)
EVM0031157	EVM0031157	5.97995	8.10642	10.4164	6.85354e-17	1.63108	up	0.000274242	0.90832	up	0.670856	0.669357	normal	--	--	Cellular Component: SAGA-type complex (GO:0070461);;	--	--	--	--	Transcriptional regulator of RNA polII, SAGA, subunit	--	S	Function unknown	uncharacterized protein LOC112033432 [Quercus suber]	cellular component: cell (GO:0005623);; cellular component: membrane-enclosed lumen (GO:0031974);; cellular component: macromolecular complex (GO:0032991);; cellular component: organelle (GO:0043226);; cellular component: organelle part (GO:0044422);; cellular component: cell part (GO:0044464)
EVM0031608	EVM0031608	2.2718	6.79791	4.54964	0.000226726	1.72645	up	0.000616942	1.97611	up	0.990278	-0.181352	normal	--	--	--	--	--	--	--	--	--	S	Function unknown	uncharacterized protein LOC112024765 [Quercus suber]	--
EVM0026915	EVM0026915	6.83095	0.770944	0.09522	1.00731e-24	-5.18866	down	3.85835e-14	-2.62794	down	0.59763	-1.14555	normal	--	--	--	--	--	--	--	SBP domain	Squamosa promoter-binding-like protein 6 OS=Arabidopsis thaliana OX=3702 GN=SPL6 PE=1 SV=2	S	Function unknown	squamosa promoter-binding-like protein 6 [Quercus suber]	--
EVM0017049	EVM0017049	9.54973	0.521814	0.889717	0.00166232	-2.39246	down	1.57387e-05	-3.40917	down	--	--	--	--	--	Biological Process: lipid transport (GO:0006869);; Molecular Function: lipid binding (GO:0008289);;	--	--	--	--	Protease inhibitor/seed storage/LTP family;; Probable lipid transfer	Non-specific lipid-transfer protein 1 OS=Prunus dulcis OX=3755 PE=3 SV=1	U	Intracellular trafficking, secretion, and vesicular transport	non-specific lipid-transfer protein 1-like [Quercus suber]	biological process: single-organism process (GO:0044699);; biological process: localization (GO:0051179);; molecular function: binding (GO:0005488)
EVM0003213	EVM0003213	10.0919	2.05885	0.232504	5.56488e-20	-4.4361	down	1.73908e-05	-1.7796	down	0.349302	-1.48896	normal	--	--	--	--	--	[S]	Function unknown	CLASP N terminal	--	S	Function unknown	TOG array regulator of axonemal microtubules protein 1 [Quercus suber]	--
EVM0015870	EVM0015870	2.19502	0.201945	0.326933	0.0235359	-1.72017	normal	0.0101835	-2.49846	normal	--	--	--	--	--	Cellular Component: cytoplasm (GO:0005737);; Biological Process: metal ion transport (GO:0030001);; Molecular Function: transition metal ion binding (GO:0046914);; Biological Process: cellular transition metal ion homeostasis (GO:0046916);;	--	--	--	--	--	Heavy metal-associated isoprenylated plant protein 47 OS=Arabidopsis thaliana OX=3702 GN=HIPP47 PE=3 SV=1	S	Function unknown	heavy metal-associated isoprenylated plant protein 46 [Quercus suber]	cellular component: cell (GO:0005623);; cellular component: cell part (GO:0044464);; biological process: localization (GO:0051179);; molecular function: binding (GO:0005488);; biological process: cellular process (GO:0009987);; biological process: single-organism process (GO:0044699);; biological process: biological regulation (GO:0065007)
EVM0028186	EVM0028186	4.56671	9.36746	6.36069	0.00189883	1.27569	up	0.00227203	1.48309	up	0.988767	-0.16514	normal	--	--	--	--	--	--	--	Legume lectin domain	Galactose-binding lectin OS=Arachis hypogaea OX=3818 PE=1 SV=3	--	--	L-type lectin-domain containing receptor kinase IX.1-like [Quercus suber]	--
EVM0033197	EVM0033197	60.9611	93.3731	121.575	6.14957e-31	1.8259	up	6.49114e-17	1.08593	up	0.505263	0.708785	normal	--	--	Molecular Function: nucleotide binding (GO:0000166);; Molecular Function: nucleic acid binding (GO:0003676);;	--	--	[R]	General function prediction only	RNA recognition motif. (a.k.a. RRM, RBD, or RNP domain);; Ataxin-2 C-terminal region	Polyadenylate-binding protein-interacting protein 11 OS=Arabidopsis thaliana OX=3702 GN=CID11 PE=2 SV=1	S	Function unknown	polyadenylate-binding protein-interacting protein 12-like isoform X2 [Quercus suber]	molecular function: binding (GO:0005488)
EVM0032169	EVM0032169	3.61009	21.588	69.4463	8.74414e-21	5.11198	up	2.02324e-12	2.99914	up	0.0164153	1.82477	normal	[G]	Carbohydrate transport and metabolism	Molecular Function: alpha-amylase activity (GO:0004556);; Molecular Function: calcium ion binding (GO:0005509);; Biological Process: carbohydrate metabolic process (GO:0005975);;	K01176|0|vra:106772881|K01176 alpha-amylase [EC:3.2.1.1] | (RefSeq) alpha-amylase	Starch and sucrose metabolism (ko00500)	[G]	Carbohydrate transport and metabolism	Alpha-amylase C-terminal beta-sheet domain;; Alpha amylase, catalytic domain;; Glycosyl hydrolase family 70	Alpha-amylase OS=Vigna mungo OX=3915 GN=AMY1.1 PE=2 SV=1	G	Carbohydrate transport and metabolism	alpha-amylase-like [Quercus suber]	molecular function: catalytic activity (GO:0003824);; molecular function: binding (GO:0005488);; biological process: metabolic process (GO:0008152)
EVM0031514	EVM0031514	34.4722	12.0523	5.04254	3.81058e-49	-1.95604	down	6.02832e-12	-1.03904	down	0.490161	-0.789583	normal	--	--	Molecular Function: translation initiation factor activity (GO:0003743);; Biological Process: translational initiation (GO:0006413);;	K11593|0|rcu:8275276|K11593 eukaryotic translation initiation factor 2C | (RefSeq) protein argonaute 5	--	[J]	Translation, ribosomal structure and biogenesis	Piwi domain;; PAZ domain;; N-terminal domain of argonaute;; Argonaute linker 1 domain;; Argonaute linker 2 domain;; Mid domain of argonaute	Protein argonaute 5 OS=Arabidopsis thaliana OX=3702 GN=AGO5 PE=1 SV=2	J	Translation, ribosomal structure and biogenesis	protein argonaute 5-like isoform X1 [Quercus suber]	molecular function: binding (GO:0005488);; biological process: metabolic process (GO:0008152);; biological process: cellular process (GO:0009987)
EVM0029401	EVM0029401	4.3056	0.045822	0	2.19764e-09	-8.94575	down	9.2968e-15	-5.67544	down	--	--	--	--	--	Molecular Function: protein serine/threonine kinase activity (GO:0004674);; Molecular Function: ATP binding (GO:0005524);; Cellular Component: plasma membrane (GO:0005886);; Biological Process: protein phosphorylation (GO:0006468);; Biological Process: cell surface receptor signaling pathway (GO:0007166);; Cellular Component: integral component of membrane (GO:0016021);; Molecular Function: polys…	--	--	[T]	Signal transduction mechanisms	Protein tyrosine kinase;; Protein kinase domain;; Wall-associated receptor kinase galacturonan-binding	Probably inactive receptor-like protein kinase At2g46850 OS=Arabidopsis thaliana OX=3702 GN=At2g46850 PE=3 SV=1	T	Signal transduction mechanisms	probably inactive receptor-like protein kinase At2g46850 [Quercus suber]	molecular function: catalytic activity (GO:0003824);; biological process: metabolic process (GO:0008152);; biological process: cellular process (GO:0009987);; molecular function: binding (GO:0005488);; cellular component: cell (GO:0005623);; cellular component: membrane (GO:0016020);; cellular component: cell part (GO:0044464);; biological process: signaling (GO:0023052);; biological process: sin…
EVM0021081	EVM0021081	1.43359	0.339924	0.219072	0.000499906	-1.90142	down	0.00690541	-1.5123	down	0.992661	-0.162937	normal	--	--	--	--	--	[R]	General function prediction only	Reverse transcriptase (RNA-dependent DNA polymerase);; Retroviral aspartyl protease	Uncharacterized mitochondrial protein AtMg00860 OS=Arabidopsis thaliana OX=3702 GN=AtMg00860 PE=4 SV=1	L	Replication, recombination and repair	uncharacterized protein LOC111992135 [Quercus suber]	--
EVM0018140	EVM0018140	4.36144	0	0.166094	1.64835e-07	-3.85201	down	4.64895e-07	-6.21592	down	--	--	--	--	--	--	--	--	--	--	--	--	S	Function unknown	hypothetical protein CFP56_29615 [Quercus suber]	--
EVM0030963	EVM0030963	31.5001	55.1518	47.5769	2.33035e-11	1.43953	up	2.26887e-15	1.27959	up	0.979832	0.17381	normal	[BQ]	Chromatin structure and dynamics;; Secondary metabolites biosynthesis, transport and catabolism	Cellular Component: nucleus (GO:0005634);; Biological Process: DNA mediated transformation (GO:0009294);; Biological Process: pathogenesis (GO:0009405);; Biological Process: jasmonic acid and ethylene-dependent systemic resistance (GO:0009861);; Biological Process: histone acetylation (GO:0016573);; Molecular Function: NAD-dependent histone deacetylase activity (H3-K14 specific) (GO:0032041);; Bi…	K06067|0|cit:102626043|K06067 histone deacetylase 1/2 [EC:3.5.1.98] | (RefSeq) histone deacetylase 19	--	[B]	Chromatin structure and dynamics	Histone deacetylase domain	Histone deacetylase 19 OS=Arabidopsis thaliana OX=3702 GN=HDA19 PE=1 SV=2	BQ	Chromatin structure and dynamics;; Secondary metabolites biosynthesis, transport and catabolism	histone deacetylase 19 [Quercus suber]	cellular component: cell (GO:0005623);; cellular component: organelle (GO:0043226);; cellular component: cell part (GO:0044464);; biological process: cellular process (GO:0009987);; biological process: multi-organism process (GO:0051704);; biological process: immune system process (GO:0002376);; biological process: response to stimulus (GO:0050896);; biological process: metabolic process (GO:0008…
EVM0023628	EVM0023628	5.59934	7.10262	10.2943	8.66903e-08	1.74362	up	0.00135105	0.811953	up	0.503524	0.843467	normal	--	--	Cellular Component: integral component of membrane (GO:0016021);; Molecular Function: transferase activity, transferring glycosyl groups (GO:0016757);;	--	--	--	--	GDP-fucose protein O-fucosyltransferase	Protein ESMERALDA 1 OS=Arabidopsis thaliana OX=3702 GN=ESMD1 PE=2 SV=1	S	Function unknown	protein ESMERALDA 1 [Quercus suber]	cellular component: membrane (GO:0016020);; cellular component: membrane part (GO:0044425);; molecular function: catalytic activity (GO:0003824)
Castanea_mollissima_newGene_4832	--	3.46282	0.259321	0.121412	8.16546e-14	-3.7801	down	7.91185e-08	-2.69083	down	--	--	--	--	--	--	--	--	--	--	--	Protein trichome birefringence-like 12 OS=Arabidopsis thaliana OX=3702 GN=TBL12 PE=2 SV=1	S	Function unknown	hypothetical protein CUMW_209750 [Citrus unshiu]	--
EVM0031058	EVM0031058	8.07057	11.2252	13.9844	9.00963e-06	1.67448	up	8.80618e-05	0.946391	up	0.740888	0.657813	normal	[L]	Replication, recombination and repair	--	K17675|0|mdm:103424039|K17675 ATP-dependent RNA helicase SUPV3L1/SUV3 [EC:3.6.4.13] | (RefSeq) ATP-dependent RNA helicase SUV3, mitochondrial-like	--	[A]	RNA processing and modification	Mitochondrial degradasome RNA helicase subunit C terminal;; Helicase conserved C-terminal domain	ATP-dependent RNA helicase SUV3, mitochondrial OS=Oryza sativa subsp. japonica OX=39947 GN=SUV3 PE=1 SV=1	L	Replication, recombination and repair	PREDICTED: DExH-box ATP-dependent RNA helicase DExH16, mitochondrial isoform X1 [Juglans regia]	--
EVM0025662	EVM0025662	0.718027	0.263756	0.083058	7.52501e-05	-2.16092	down	0.0823157	-0.932955	normal	0.936044	-0.524543	normal	[K]	Transcription	--	--	--	[T]	Signal transduction mechanisms	NB-ARC domain;; Leucine Rich repeats (2 copies)	Putative disease resistance protein RGA3 OS=Solanum bulbocastanum OX=147425 GN=RGA3 PE=2 SV=2	S	Function unknown	putative disease resistance protein RGA4 isoform X1 [Quercus suber]	--
Castanea_mollissima_newGene_5132	--	4.49271	0	0.005558	3.55917e-09	-6.68984	down	3.44722e-08	-6.62945	down	--	--	--	[T]	Signal transduction mechanisms	Molecular Function: protein kinase activity (GO:0004672);; Molecular Function: ATP binding (GO:0005524);; Biological Process: protein phosphorylation (GO:0006468);; Cellular Component: integral component of membrane (GO:0016021);;	--	--	--	--	Protein kinase domain;; Protein tyrosine kinase	MDIS1-interacting receptor like kinase 2 OS=Arabidopsis thaliana OX=3702 GN=MIK2 PE=1 SV=3	T	Signal transduction mechanisms	MDIS1-interacting receptor like kinase 2-like [Quercus suber]	molecular function: catalytic activity (GO:0003824);; biological process: metabolic process (GO:0008152);; biological process: cellular process (GO:0009987);; molecular function: binding (GO:0005488);; cellular component: membrane (GO:0016020);; cellular component: membrane part (GO:0044425)
EVM0029261	EVM0029261	5.70993	0.174708	0	1.02662e-09	-9.06595	down	1.57857e-16	-4.36417	down	--	--	--	--	--	Molecular Function: transcription factor activity, sequence-specific DNA binding (GO:0003700);; Biological Process: regulation of transcription, DNA-templated (GO:0006355);; Molecular Function: sequence-specific DNA binding (GO:0043565);;	--	--	--	--	Basic region leucine zipper;; bZIP transcription factor;; bZIP Maf transcription factor	Basic leucine zipper 61 OS=Arabidopsis thaliana OX=3702 GN=BZIP61 PE=1 SV=1	K	Transcription	basic leucine zipper 61-like [Quercus suber]	molecular function: nucleic acid binding transcription factor activity (GO:0001071);; biological process: biological regulation (GO:0065007);; molecular function: binding (GO:0005488)
EVM0027645	EVM0027645	11.4492	1.79381	0.492992	1.34407e-60	-3.71274	down	6.29426e-23	-2.18689	down	0.525845	-1.10592	normal	--	--	Molecular Function: nucleotide binding (GO:0000166);; Molecular Function: protein kinase activity (GO:0004672);; Biological Process: protein phosphorylation (GO:0006468);; Biological Process: microtubule-based process (GO:0007017);;	K08857|0|pmum:103344070|K08857 NIMA (never in mitosis gene a)-related kinase 1/4/5 [EC:2.7.11.1] | (RefSeq) serine/threonine-protein kinase Nek5-like	--	[R]	General function prediction only	--	Serine/threonine-protein kinase Nek5 OS=Arabidopsis thaliana OX=3702 GN=NEK5 PE=1 SV=1	T	Signal transduction mechanisms	serine/threonine-protein kinase Nek5 [Quercus suber]	molecular function: binding (GO:0005488);; molecular function: catalytic activity (GO:0003824);; biological process: metabolic process (GO:0008152);; biological process: cellular process (GO:0009987)
EVM0007478	EVM0007478	585.012	315.316	134.202	1.94982e-08	-1.35094	down	0.0296741	-0.419516	normal	0.44097	-0.80645	normal	--	--	--	--	--	--	--	Dormancy/auxin associated protein	Dormancy-associated protein homolog 3 OS=Arabidopsis thaliana OX=3702 GN=At1g56220 PE=1 SV=1	S	Function unknown	dormancy-associated protein homolog 3 isoform X2 [Quercus suber]	--
EVM0024092	EVM0024092	2.82596	1.4865	0.192462	1.78761e-05	-2.87295	down	0.542543	-0.420792	normal	0.621316	-1.11898	normal	--	--	Molecular Function: DNA binding (GO:0003677);;	K09422|3.67031e-86|tcc:TCM_029126|K09422 myb proto-oncogene protein, plant | (RefSeq) Myb domain protein 23	--	[K]	Transcription	Myb-like DNA-binding domain;; Myb-like DNA-binding domain	Transcription factor WER OS=Arabidopsis thaliana OX=3702 GN=WER PE=1 SV=1	K	Transcription	transcription factor WER-like isoform X1 [Quercus suber]	molecular function: binding (GO:0005488)
EVM0012697	EVM0012697	3.00252	0.410552	0.18752	0.000231787	-3.20271	down	0.000192766	-2.29618	down	--	--	--	--	--	Biological Process: maturation of 5.8S rRNA (GO:0000460);; Biological Process: maturation of LSU-rRNA (GO:0000470);; Molecular Function: nucleic acid binding (GO:0003676);; Cellular Component: nucleolus (GO:0005730);; Cellular Component: preribosome, large subunit precursor (GO:0030687);;	K14831|1.32036e-119|vvi:100854778|K14831 protein MAK16 | (RefSeq) protein MAK16 homolog	--	[A]	RNA processing and modification	Ribosomal L28e protein family;; Mak16 protein C-terminal region	--	S	Function unknown	protein MAK16 homolog [Quercus suber]	biological process: metabolic process (GO:0008152);; biological process: cellular process (GO:0009987);; biological process: cellular component organization or biogenesis (GO:0071840);; molecular function: binding (GO:0005488);; cellular component: cell (GO:0005623);; cellular component: organelle (GO:0043226);; cellular component: organelle part (GO:0044422);; cellular component: cell part (GO:0…
EVM0023350	EVM0023350	14.1955	5.86987	4.71032	1.83945e-06	-0.768933	down	5.86886e-06	-0.795201	down	0.995111	0.0579534	normal	--	--	Molecular Function: transferase activity (GO:0016740);;	--	--	[L]	Replication, recombination and repair	Nucleotidyltransferase domain;; Cid1 family poly A polymerase	--	L	Replication, recombination and repair	uncharacterized protein LOC112037447 isoform X1 [Quercus suber]	molecular function: catalytic activity (GO:0003824)
EVM0022173	EVM0022173	12.6971	77.7061	61.6808	9.65125e-11	3.10911	up	0.000404641	2.88593	up	0.994485	0.0732957	normal	--	--	--	--	--	--	--	Peptidase of plants and bacteria	Basic secretory protease (Fragments) OS=Boswellia serrata OX=613112 PE=1 SV=1	S	Function unknown	uncharacterized protein LOC112033117 [Quercus suber]	--
EVM0001571	EVM0001571	0.464067	178.197	572.512	6.7114e-86	10.9699	up	4.38329e-240	8.93964	up	0.0215003	1.81348	normal	[QR]	Secondary metabolites biosynthesis, transport and catabolism;; General function prediction only	Molecular Function: zinc ion binding (GO:0008270);; Molecular Function: oxidoreductase activity (GO:0016491);; Biological Process: oxidation-reduction process (GO:0055114);;	--	--	[R]	General function prediction only	Zinc-binding dehydrogenase;; N-terminal domain of oxidoreductase;; Zinc-binding dehydrogenase	2-alkenal reductase (NADP(+)-dependent) OS=Nicotiana tabacum OX=4097 GN=DBR PE=1 SV=1	S	Function unknown	PREDICTED: 2-alkenal reductase (NADP(+)-dependent)-like [Juglans regia]	molecular function: binding (GO:0005488);; molecular function: catalytic activity (GO:0003824);; biological process: metabolic process (GO:0008152);; biological process: single-organism process (GO:0044699)
EVM0027387	EVM0027387	23.2117	0.362483	0.097793	3.58173e-48	-6.92968	down	1.82198e-46	-5.41223	down	--	--	--	--	--	Cellular Component: integral component of membrane (GO:0016021);;	--	--	--	--	GDSL/SGNH-like Acyl-Esterase family found in Pmr5 and Cas1p;; PMR5 N terminal Domain	Protein PMR5 OS=Arabidopsis thaliana OX=3702 GN=PMR5 PE=2 SV=1	S	Function unknown	protein PMR5-like [Quercus suber]	cellular component: membrane (GO:0016020);; cellular component: membrane part (GO:0044425)
EVM0021620	EVM0021620	1.47363	0.396112	0.0898355	1.43574e-10	-3.19731	down	0.00182152	-1.38597	down	0.787209	-0.888112	normal	--	--	--	--	--	--	--	Domain of unknown function (DUF4220);; Protein of unknown function, DUF594	--	S	Function unknown	hypothetical protein CFP56_19922 [Quercus suber]	--
EVM0011754	EVM0011754	1.4826	0.460352	0.0903445	4.91682e-07	-3.13047	down	0.077676	-1.13369	normal	--	--	--	--	--	--	--	--	--	--	--	--	S	Function unknown	uncharacterized protein LOC111993000 [Quercus suber]	--
EVM0014856	EVM0014856	1.29307	0.049377	0	0.000111879	-6.51431	down	0.000943872	-3.23393	down	--	--	--	--	--	Molecular Function: DNA binding (GO:0003677);; Cellular Component: nucleus (GO:0005634);;	--	--	[O]	Posttranslational modification, protein turnover, chaperones	Myb-like DNA-binding domain	Protein RADIALIS-like 3 OS=Arabidopsis thaliana OX=3702 GN=RL3 PE=2 SV=1	K	Transcription	protein RADIALIS-like 3 isoform X1 [Quercus suber]	molecular function: binding (GO:0005488);; cellular component: cell (GO:0005623);; cellular component: organelle (GO:0043226);; cellular component: cell part (GO:0044464)
Castanea_mollissima_newGene_5700	--	2.69668	0	0.0338765	3.5459e-11	-5.52152	down	4.40917e-08	-6.59253	down	--	--	--	--	--	--	--	--	--	--	Plant mobile domain	Serine/threonine-protein phosphatase 7 long form homolog OS=Arabidopsis thaliana OX=3702 GN=MAIL3 PE=2 SV=1	S	Function unknown	serine/threonine-protein phosphatase 7 long form homolog [Quercus suber]	--
EVM0019822	EVM0019822	1.11815	3.30589	2.18755	1.08741e-07	1.81587	up	1.48557e-08	2.01296	up	0.989965	-0.157032	normal	[V]	Defense mechanisms	--	--	--	[Q]	Secondary metabolites biosynthesis, transport and catabolism	ABC transporter;; ABC transporter transmembrane region;; AAA domain, putative AbiEii toxin, Type IV TA system;; P-loop containing region of AAA domain;; 50S ribosome-binding GTPase	ABC transporter C family member 8 OS=Arabidopsis thaliana OX=3702 GN=ABCC8 PE=2 SV=3	V	Defense mechanisms	ABC transporter C family member 8-like isoform X2 [Quercus suber]	--
Castanea_mollissima_newGene_7825	--	5.45602	1.32885	0.733277	7.42631e-12	-2.05335	down	5.94777e-05	-1.52906	down	0.982718	-0.278312	normal	--	--	--	--	--	--	--	--	--	--	--	--	--
EVM0008898	EVM0008898	2.70679	1.51835	0.296765	1.98889e-07	-2.28298	down	0.419075	-0.354018	normal	0.620772	-1.11695	normal	[V]	Defense mechanisms	Biological Process: drug transmembrane transport (GO:0006855);; Molecular Function: drug transmembrane transporter activity (GO:0015238);; Molecular Function: antiporter activity (GO:0015297);; Cellular Component: integral component of membrane (GO:0016021);;	K03327|0|egr:104433509|K03327 multidrug resistance protein, MATE family | (RefSeq) protein DETOXIFICATION 29	--	[R]	General function prediction only	MatE	Protein DETOXIFICATION 31 OS=Arabidopsis thaliana OX=3702 GN=DTX31 PE=2 SV=1	V	Defense mechanisms	PREDICTED: protein DETOXIFICATION 29 [Juglans regia]	biological process: single-organism process (GO:0044699);; biological process: response to stimulus (GO:0050896);; biological process: localization (GO:0051179);; molecular function: transporter activity (GO:0005215);; cellular component: membrane (GO:0016020);; cellular component: membrane part (GO:0044425)
EVM0018178	EVM0018178	228.266	122.843	45.7868	2.41799e-10	-1.50449	down	0.114069	-0.425449	normal	0.256963	-0.95039	normal	[Q]	Secondary metabolites biosynthesis, transport and catabolism	Molecular Function: hydrolase activity (GO:0016787);;	--	--	[R]	General function prediction only	Dienelactone hydrolase family	Endo-1,3;1,4-beta-D-glucanase OS=Zea mays OX=4577 PE=1 SV=1	Q	Secondary metabolites biosynthesis, transport and catabolism	endo-1,3;1,4-beta-D-glucanase-like [Quercus suber]	molecular function: catalytic activity (GO:0003824)
EVM0024560	EVM0024560	71.1805	82.8774	159.264	8.16309e-07	2.04653	up	0.0166045	0.69256	normal	0.157809	1.21844	normal	--	--	Molecular Function: metal ion binding (GO:0046872);;	--	--	[R]	General function prediction only	A20-like zinc finger;; AN1-like Zinc finger	Zinc finger A20 and AN1 domain-containing stress-associated protein 3 OS=Arabidopsis thaliana OX=3702 GN=SAP3 PE=2 SV=1	S	Function unknown	zinc finger a20 and an1 domain-containing stress-associated protein 3 [Quercus suber]	molecular function: binding (GO:0005488)
EVM0013613	EVM0013613	170.01	203.659	189.709	3.23204e-06	0.968892	up	0.000861085	0.735646	up	0.95478	0.247842	normal	[O]	Posttranslational modification, protein turnover, chaperones	Molecular Function: ATP binding (GO:0005524);; Cellular Component: nucleus (GO:0005634);; Cellular Component: mitochondrion (GO:0005739);; Cellular Component: vacuolar membrane (GO:0005774);; Cellular Component: endoplasmic reticulum (GO:0005783);; Cellular Component: plasma membrane (GO:0005886);; Biological Process: protein folding (GO:0006457);; Biological Process: protein secretion (GO:000930…	K09487|0|pvu:PHAVU_001G005200g|K09487 heat shock protein 90kDa beta | (RefSeq) hypothetical protein	Protein processing in endoplasmic reticulum (ko04141);; Plant-pathogen interaction (ko04626)	[O]	Posttranslational modification, protein turnover, chaperones	Hsp90 protein;; Histidine kinase-, DNA gyrase B-, and HSP90-like ATPase;; Histidine kinase-, DNA gyrase B-, and HSP90-like ATPase	Endoplasmin homolog OS=Catharanthus roseus OX=4058 GN=HSP90 PE=2 SV=1	O	Posttranslational modification, protein turnover, chaperones	endoplasmin homolog isoform X2 [Quercus suber]	molecular function: binding (GO:0005488);; cellular component: cell (GO:0005623);; cellular component: organelle (GO:0043226);; cellular component: cell part (GO:0044464);; cellular component: membrane (GO:0016020);; cellular component: organelle part (GO:0044422);; biological process: cellular process (GO:0009987);; biological process: single-organism process (GO:0044699);; biological process: l…
EVM0020752	EVM0020752	30.4234	4.17815	1.33328	2.77805e-27	-3.60305	down	2.2643e-27	-2.3761	down	0.769374	-0.845282	normal	--	--	--	--	--	--	--	--	--	--	--	hypothetical protein CFP56_05604 [Quercus suber]	--
EVM0026653	EVM0026653	31.9562	81.3549	114.204	1.65567e-37	2.67467	up	1.29596e-22	1.81732	up	0.402442	0.809548	normal	[G]	Carbohydrate transport and metabolism	Biological Process: carbohydrate metabolic process (GO:0005975);; Cellular Component: integral component of membrane (GO:0016021);; Biological Process: dephosphorylation (GO:0016311);; Molecular Function: fructose 1,6-bisphosphate 1-phosphatase activity (GO:0042132);;	K03841|0|cic:CICLE_v10001734mg|K03841 fructose-1,6-bisphosphatase I [EC:3.1.3.11] | (RefSeq) hypothetical protein	Glycolysis / Gluconeogenesis (ko00010);; Pentose phosphate pathway (ko00030);; Fructose and mannose metabolism (ko00051);; Carbon fixation in photosynthetic organisms (ko00710);; Carbon metabolism (ko01200)	[G]	Carbohydrate transport and metabolism	Fructose-1-6-bisphosphatase, N-terminal domain	Fructose-1,6-bisphosphatase, cytosolic OS=Beta vulgaris OX=161934 PE=2 SV=2	G	Carbohydrate transport and metabolism	fructose-1,6-bisphosphatase, cytosolic isoform X1 [Quercus suber]	biological process: metabolic process (GO:0008152);; cellular component: membrane (GO:0016020);; cellular component: membrane part (GO:0044425);; biological process: cellular process (GO:0009987);; molecular function: catalytic activity (GO:0003824)
Castanea_mollissima_newGene_5573	--	3.36704	0.484701	0.118177	1.00466e-15	-4.01997	down	2.06353e-07	-2.44485	down	--	--	--	--	--	--	--	--	--	--	--	--	--	--	uncharacterized protein LOC111989670, partial [Quercus suber]	--
EVM0026859	EVM0026859	0.528885	1.78638	1.76589	4.63376e-06	2.50854	up	0.0113494	2.0509	normal	0.982718	0.26638	normal	[R]	General function prediction only	Cellular Component: integral component of membrane (GO:0016021);; Molecular Function: transferase activity (GO:0016740);;	--	--	[R]	General function prediction only	Methyltransferase domain;; Cephalosporin hydroxylase	--	S	Function unknown	uncharacterized protein LOC111993262 [Quercus suber]	cellular component: membrane (GO:0016020);; cellular component: membrane part (GO:0044425);; molecular function: catalytic activity (GO:0003824)
EVM0015220	EVM0015220	4.38217	1.78782	0.572087	6.74044e-13	-2.08833	down	0.0155594	-0.809326	normal	0.734937	-0.885515	normal	--	--	--	--	--	--	--	--	--	S	Function unknown	cell wall protein RBR3 [Quercus suber]	--
EVM0010971	EVM0010971	40.0293	4.0173	0.356469	5.07218e-86	-6.00288	down	1.32664e-66	-2.83391	down	0.00500922	-2.43358	down	[O]	Posttranslational modification, protein turnover, chaperones	Molecular Function: ATP binding (GO:0005524);;	K03283|0|vvi:100253562|K03283 heat shock 70kDa protein 1/8 | (RefSeq) heat shock cognate 70 kDa protein-like	Spliceosome (ko03040);; Protein processing in endoplasmic reticulum (ko04141);; Endocytosis (ko04144)	[O]	Posttranslational modification, protein turnover, chaperones	Hsp70 protein;; MreB/Mbl protein;; NAD-specific glutamate dehydrogenase	Heat shock cognate 70 kDa protein OS=Petunia hybrida OX=4102 GN=HSP70 PE=2 SV=1	O	Posttranslational modification, protein turnover, chaperones	probable mediator of RNA polymerase II transcription subunit 37e [Quercus suber]	molecular function: binding (GO:0005488)
EVM0002227	EVM0002227	18.9971	4.95279	2.88479	4.39866e-24	-1.89702	down	5.51174e-12	-1.46037	down	0.94699	-0.341302	normal	[M]	Cell wall/membrane/envelope biogenesis	Molecular Function: protein serine/threonine kinase activity (GO:0004674);; Molecular Function: ATP binding (GO:0005524);; Cellular Component: plasma membrane (GO:0005886);; Biological Process: protein phosphorylation (GO:0006468);; Cellular Component: integral component of membrane (GO:0016021);;	K04733|0|pmum:103327940|K04733 interleukin-1 receptor-associated kinase 4 [EC:2.7.11.1] | (RefSeq) proline-rich receptor-like protein kinase PERK1	--	[T]	Signal transduction mechanisms	Protein tyrosine kinase;; Protein kinase domain	Proline-rich receptor-like protein kinase PERK1 OS=Arabidopsis thaliana OX=3702 GN=PERK1 PE=1 SV=1	T	Signal transduction mechanisms	proline-rich receptor-like protein kinase PERK1 [Quercus suber]	molecular function: catalytic activity (GO:0003824);; biological process: metabolic process (GO:0008152);; biological process: cellular process (GO:0009987);; molecular function: binding (GO:0005488);; cellular component: cell (GO:0005623);; cellular component: membrane (GO:0016020);; cellular component: cell part (GO:0044464);; cellular component: membrane part (GO:0044425)
EVM0001559	EVM0001559	22.1722	37.7654	31.218	8.02475e-15	1.32835	up	8.67002e-21	1.24013	up	0.990278	0.110839	normal	--	--	Molecular Function: ubiquitin-protein transferase activity (GO:0004842);; Cellular Component: nucleus (GO:0005634);; Cellular Component: cytoplasm (GO:0005737);; Molecular Function: ligase activity (GO:0016874);; Biological Process: protein ubiquitination involved in ubiquitin-dependent protein catabolic process (GO:0042787);;	K10590|0|pmum:103337775|K10590 E3 ubiquitin-protein ligase TRIP12 [EC:2.3.2.26] | (RefSeq) E3 ubiquitin-protein ligase UPL4	Ubiquitin mediated proteolysis (ko04120)	[O]	Posttranslational modification, protein turnover, chaperones	HECT-domain (ubiquitin-transferase);; Armadillo/beta-catenin-like repeat	E3 ubiquitin-protein ligase UPL4 OS=Arabidopsis thaliana OX=3702 GN=UPL4 PE=3 SV=1	O	Posttranslational modification, protein turnover, chaperones	E3 ubiquitin-protein ligase UPL4 [Quercus suber]	molecular function: catalytic activity (GO:0003824);; cellular component: cell (GO:0005623);; cellular component: organelle (GO:0043226);; cellular component: cell part (GO:0044464);; biological process: metabolic process (GO:0008152);; biological process: cellular process (GO:0009987)
EVM0001294	EVM0001294	13.0695	2.76128	1.75452	1.20538e-15	-2.05682	down	1.14966e-08	-1.75207	down	0.990278	-0.184792	normal	[R]	General function prediction only	Molecular Function: GTP binding (GO:0005525);; Cellular Component: intracellular (GO:0005622);; Biological Process: small GTPase mediated signal transduction (GO:0007264);;	K07910|9.85386e-114|cit:102624050|K07910 Ras-related protein Rab-18 | (RefSeq) ras-related protein RABC2a	--	[R]	General function prediction only	Ras family;; Ras of Complex, Roc, domain of DAPkinase;; ADP-ribosylation factor family;; Gtr1/RagA G protein conserved region;; 50S ribosome-binding GTPase	Ras-related protein RABC2a OS=Arabidopsis thaliana OX=3702 GN=RABC2A PE=1 SV=1	S	Function unknown	ras-related protein RABC2a-like isoform X3 [Quercus suber]	molecular function: binding (GO:0005488);; cellular component: cell (GO:0005623);; cellular component: cell part (GO:0044464);; biological process: cellular process (GO:0009987);; biological process: signaling (GO:0023052);; biological process: single-organism process (GO:0044699);; biological process: response to stimulus (GO:0050896);; biological process: biological regulation (GO:0065007)
EVM0011064	EVM0011064	11.5206	37.3416	31.6433	1.16997e-53	2.2785	up	4.12057e-47	2.1625	up	0.988373	0.135643	normal	[K]	Transcription	Molecular Function: protein serine/threonine kinase activity (GO:0004674);; Molecular Function: ATP binding (GO:0005524);; Biological Process: protein phosphorylation (GO:0006468);; Cellular Component: integral component of membrane (GO:0016021);;	--	--	--	--	Protein kinase domain;; Leucine rich repeat;; Leucine Rich repeats (2 copies);; Protein tyrosine kinase;; Leucine Rich Repeat;; Leucine rich repeat N-terminal domain	Serine/threonine-protein kinase BRI1-like 1 OS=Arabidopsis thaliana OX=3702 GN=BRL1 PE=1 SV=1	S	Function unknown	receptor-like protein kinase BRI1-like 3 [Quercus suber]	molecular function: catalytic activity (GO:0003824);; biological process: metabolic process (GO:0008152);; biological process: cellular process (GO:0009987);; molecular function: binding (GO:0005488);; cellular component: membrane (GO:0016020);; cellular component: membrane part (GO:0044425)
EVM0032684	EVM0032684	63.0683	459.363	387.272	8.05765e-99	3.43617	up	8.13015e-87	3.33055	up	0.990019	0.125004	normal	[Q]	Secondary metabolites biosynthesis, transport and catabolism	Molecular Function: iron ion binding (GO:0005506);; Molecular Function: oxidoreductase activity (GO:0016491);; Biological Process: oxidation-reduction process (GO:0055114);;	--	--	[QR]	Secondary metabolites biosynthesis, transport and catabolism;; General function prediction only	non-haem dioxygenase in morphine synthesis N-terminal;; 2OG-Fe(II) oxygenase superfamily	Protein DMR6-LIKE OXYGENASE 2 OS=Arabidopsis thaliana OX=3702 GN=DLO2 PE=2 SV=1	S	Function unknown	protein DMR6-LIKE OXYGENASE 2-like isoform X3 [Quercus suber]	molecular function: binding (GO:0005488);; molecular function: catalytic activity (GO:0003824);; biological process: metabolic process (GO:0008152);; biological process: single-organism process (GO:0044699)
EVM0005068	EVM0005068	1.02059	0.318626	0.178162	0.00223629	-1.67486	down	0.0856626	-1.15475	normal	--	--	--	[K]	Transcription	--	--	--	[R]	General function prediction only	Leucine rich repeat;; Leucine Rich repeats (2 copies);; Leucine Rich Repeat	Receptor-like protein 7 OS=Arabidopsis thaliana OX=3702 GN=RLP7 PE=3 SV=2	S	Function unknown	receptor-like protein Cf-9 homolog [Quercus suber]	--
EVM0017384	EVM0017384	12.777	0.223164	0.015293	1.32066e-33	-8.23516	down	7.03901e-54	-5.26179	down	--	--	--	--		Molecular Function: protein serine/threonine kinase activity (GO:0004674);; Molecular Function: ATP binding (GO:0005524);; Biological Process: protein phosphorylation (GO:0006468);; Cellular Component: integral component of membrane (GO:0016021);;	--	--	--	--	Protein kinase domain;; Protein tyrosine kinase;; Leucine rich repeat;; Leucine rich repeat N-terminal domain;; Leucine Rich repeats (2 copies)	Probable LRR receptor-like serine/threonine-protein kinase At2g23950 OS=Arabidopsis thaliana OX=3702 GN=At2g23950 PE=2 SV=1	T	Signal transduction mechanisms	probable LRR receptor-like serine/threonine-protein kinase At2g23950 [Quercus suber]	molecular function: catalytic activity (GO:0003824);; biological process: metabolic process (GO:0008152);; biological process: cellular process (GO:0009987);; molecular function: binding (GO:0005488);; cellular component: membrane (GO:0016020);; cellular component: membrane part (GO:0044425)
EVM0024431	EVM0024431	5.33079	0.501837	0.195857	1.6902e-06	-3.83712	down	2.25865e-06	-2.8062	down	--	--	--	--	--	--	K11699|3.95616e-44|vvi:100260997|K11699 RNA-dependent RNA polymerase [EC:2.7.7.48] | (RefSeq) probable RNA-dependent RNA polymerase 5	--	[A]	RNA processing and modification	RNA dependent RNA polymerase	Probable RNA-dependent RNA polymerase 5 OS=Arabidopsis thaliana OX=3702 GN=RDR5 PE=2 SV=2	K	Transcription	probable RNA-dependent RNA polymerase 5 [Quercus suber]	--
EVM0018437	EVM0018437	4.17255	8.2953	7.22274	5.22203e-06	1.6029	up	0.000190748	1.45108	up	0.983387	0.160607	normal	[NW]	Cell motility;; Extracellular structures	--	--	--	--	--	Protein tyrosine kinase;; Protein kinase domain;; D-mannose binding lectin;; S-locus glycoprotein domain;; PAN-like domain;; Domain of unknown function (DUF3403);; Phosphotransferase enzyme family;; Haspin like kinase domain	G-type lectin S-receptor-like serine/threonine-protein kinase At4g27290 OS=Arabidopsis thaliana OX=3702 GN=At4g27290 PE=3 SV=4	T	Signal transduction mechanisms	LOW QUALITY PROTEIN: uncharacterized protein LOC18781335 [Prunus persica]	--
EVM0020586	EVM0020586	14.0551	0.038886	0	4.09753e-14	-10.531	down	3.29511e-31	-7.43488	down	--	--	--	[G]	Carbohydrate transport and metabolism	Molecular Function: cellulase activity (GO:0008810);; Biological Process: cellulose catabolic process (GO:0030245);;	--	--	--	--	Glycosyl hydrolase family 9	Endoglucanase 11 OS=Arabidopsis thaliana OX=3702 GN=At2g32990 PE=2 SV=1	G	Carbohydrate transport and metabolism	endoglucanase 11 [Quercus suber]	molecular function: catalytic activity (GO:0003824);; biological process: metabolic process (GO:0008152);; biological process: cellular process (GO:0009987)
EVM0001833	EVM0001833	1006.83	24.0881	1.78104	3.87147e-136	-8.33987	down	7.91039e-113	-4.88985	down	1.46437e-06	-2.9679	down	--	--	--	--	--	--	--	Sieve element occlusion N-terminus;; Sieve element occlusion C-terminus	Protein SIEVE ELEMENT OCCLUSION B OS=Arabidopsis thaliana OX=3702 GN=SEOB PE=1 SV=1	--	--	protein SIEVE ELEMENT OCCLUSION B-like [Quercus suber]	--
EVM0019394	EVM0019394	0.975539	9.24341	19.5256	9.28616e-47	5.15041	up	6.71e-25	3.66323	up	0.0727749	1.33358	normal	[G]	Carbohydrate transport and metabolism	Biological Process: maltose metabolic process (GO:0000023);; Molecular Function: alpha-1,4-glucosidase activity (GO:0004558);; Molecular Function: carbohydrate binding (GO:0030246);; Molecular Function: maltose alpha-glucosidase activity (GO:0032450);;	--	--	[GMO]	Carbohydrate transport and metabolism;; Cell wall/membrane/envelope biogenesis;; Posttranslational modification, protein turnover, chaperones	Glycosyl hydrolases family 31	Alpha-glucosidase OS=Beta vulgaris OX=161934 PE=1 SV=1	G	Carbohydrate transport and metabolism	uncharacterized protein LOC112026477 [Quercus suber]	biological process: metabolic process (GO:0008152);; biological process: cellular process (GO:0009987);; biological process: single-organism process (GO:0044699);; molecular function: catalytic activity (GO:0003824);; molecular function: binding (GO:0005488)
EVM0000812	EVM0000812	43.5714	2.50863	0.106259	7.1254e-61	-7.74664	down	2.27554e-69	-3.62228	down	0.0439164	-2.28214	normal	--	--	--	--	--	--	--	KIP1-like protein	Kinase-interacting family protein OS=Arabidopsis thaliana OX=3702 GN=At1g48405 PE=2 SV=1	S	Function unknown	kinase-interacting family protein-like [Quercus suber]	--
EVM0008063	EVM0008063	41.3751	2.95343	0.419928	3.66584e-178	-5.80638	down	3.46122e-105	-3.32512	down	0.0393588	-1.93092	normal	--	--	--	K10406|0|vvi:100256435|K10406 kinesin family member C2/C3 | (RefSeq) kinesin-like protein KIN-14J	--	[Z]	Cytoskeleton	Kinesin motor domain;; Microtubule binding;; Calponin homology (CH) domain	Kinesin-like protein KIN-14J OS=Arabidopsis thaliana OX=3702 GN=KIN14J PE=1 SV=1	Z	Cytoskeleton	kinesin-like protein kin-14j [Quercus suber]	--
EVM0001936	EVM0001936	47.2223	79.5153	71.1555	1.38742e-15	1.42603	up	8.24582e-16	1.22237	up	0.969321	0.21495	normal	--	--	Molecular Function: translation initiation factor activity (GO:0003743);; Biological Process: DNA-templated transcription, initiation (GO:0006352);; Biological Process: translational initiation (GO:0006413);; Molecular Function: protein heterodimerization activity (GO:0046982);;	K03133|9.74586e-98|rcu:8284646|K03133 transcription initiation factor TFIID subunit 9B | (RefSeq) transcription initiation factor TFIID subunit 9	Basal transcription factors (ko03022)	[K]	Transcription	Transcription initiation factor IID, 31kD subunit;; CENP-S protein	Transcription initiation factor TFIID subunit 9 OS=Arabidopsis thaliana OX=3702 GN=TAF9 PE=1 SV=1	K	Transcription	transcription initiation factor tfiid subunit 9 [Quercus suber]	molecular function: binding (GO:0005488);; biological process: metabolic process (GO:0008152);; biological process: cellular process (GO:0009987)
EVM0023326	EVM0023326	16.6807	4.20323	0.476976	1.23341e-31	-4.30836	down	6.75695e-09	-1.50174	down	0.102094	-1.90691	normal	--	--	--	--	--	--	--	Protein of unknown function (DUF674)	--	S	Function unknown	uncharacterized protein LOC112000069 [Quercus suber]	--
EVM0025355	EVM0025355	6.51797	2.48018	1.51621	0.00116076	-1.36322	down	6.92465e-05	-0.915668	down	0.969321	-0.315109	normal	--	--	Biological Process: rRNA processing (GO:0006364);; Biological Process: tRNA export from nucleus (GO:0006409);; Cellular Component: small-subunit processome (GO:0032040);; Cellular Component: CURI complex (GO:0032545);; Cellular Component: UTP-C complex (GO:0034456);;	K14544|0|vvi:100242719|K14544 U3 small nucleolar RNA-associated protein 22 | (RefSeq) nucleolar protein 6	Ribosome biogenesis in eukaryotes (ko03008)	[S]	Function unknown	Nrap protein PAP/OAS1-like domain 5;; Nrap protein domain 3;; Nrap protein nucleotidyltransferase domain 4;; Nrap protein PAP/OAS-like domain;; Nrap protein domain 6	--	S	Function unknown	nucleolar protein 6-like [Quercus suber]	biological process: metabolic process (GO:0008152);; biological process: cellular process (GO:0009987);; biological process: single-organism process (GO:0044699);; biological process: localization (GO:0051179);; cellular component: cell (GO:0005623);; cellular component: macromolecular complex (GO:0032991);; cellular component: cell part (GO:0044464);; cellular component: organelle (GO:0043226);;…
EVM0032131	EVM0032131	1.13963	0.278806	0.121945	2.58039e-07	-2.32279	down	0.00544857	-1.50094	down	--	--	--	[K]	Transcription	Molecular Function: protein kinase activity (GO:0004672);; Biological Process: protein phosphorylation (GO:0006468);; Biological Process: single-organism metabolic process (GO:0044710);;	--	--	--	--	Protein tyrosine kinase;; Protein kinase domain;; Leucine rich repeat;; Leucine Rich repeats (2 copies);; Leucine Rich Repeat	Probable leucine-rich repeat receptor-like protein kinase At5g49770 OS=Arabidopsis thaliana OX=3702 GN=At5g49770 PE=2 SV=1	S	Function unknown	probable leucine-rich repeat receptor-like protein kinase At5g49770 isoform X2 [Quercus suber]	molecular function: catalytic activity (GO:0003824);; biological process: metabolic process (GO:0008152);; biological process: cellular process (GO:0009987);; biological process: single-organism process (GO:0044699)
EVM0021422	EVM0021422	11.7863	3.88408	2.75798	8.06929e-08	-1.30332	down	3.17765e-05	-1.11711	down	0.993553	-0.11544	normal	[U]	Intracellular trafficking, secretion, and vesicular transport	--	--	--	--	--	--	--	S	Function unknown	uncharacterized protein LOC112026588 isoform X1 [Quercus suber]	--
EVM0006124	EVM0006124	2.1035	4.9835	7.35995	6.33497e-11	2.65135	up	0.00077443	1.67953	up	0.622494	0.823712	normal	--	--	Cellular Component: ESCRT II complex (GO:0000814);; Biological Process: protein transport to vacuole involved in ubiquitin-dependent protein catabolic process via the multivesicular body sorting pathway (GO:0043328);;	K12188|7.60142e-165|jcu:105632933|K12188 ESCRT-II complex subunit VPS22 | (RefSeq) vacuolar protein sorting-associated protein 22 homolog 1	Endocytosis (ko04144)	[K]	Transcription	EAP30/Vps36 family	Vacuolar protein sorting-associated protein 22 homolog 1 OS=Arabidopsis thaliana OX=3702 GN=VP22-1 PE=2 SV=2	U	Intracellular trafficking, secretion, and vesicular transport	vacuolar protein sorting-associated protein 22 homolog 1-like [Quercus suber]	cellular component: cell (GO:0005623);; cellular component: membrane (GO:0016020);; cellular component: macromolecular complex (GO:0032991);; cellular component: organelle (GO:0043226);; cellular component: organelle part (GO:0044422);; cellular component: membrane part (GO:0044425);; cellular component: cell part (GO:0044464);; biological process: single-organism process (GO:0044699);; biologica…
EVM0012301	EVM0012301	3.87255	63.2058	107.614	3.1284e-66	5.64069	up	9.59325e-93	4.47936	up	0.206236	1.07096	normal	[V]	Defense mechanisms	Biological Process: drug transmembrane transport (GO:0006855);; Molecular Function: drug transmembrane transporter activity (GO:0015238);; Molecular Function: antiporter activity (GO:0015297);; Cellular Component: integral component of membrane (GO:0016021);;	K03327|0|cic:CICLE_v10000950mg|K03327 multidrug resistance protein, MATE family | (RefSeq) hypothetical protein	--	[R]	General function prediction only	MatE	Protein DETOXIFICATION 27 OS=Arabidopsis thaliana OX=3702 GN=DTX27 PE=2 SV=1	V	Defense mechanisms	protein DETOXIFICATION 27-like isoform X1 [Quercus suber]	biological process: single-organism process (GO:0044699);; biological process: response to stimulus (GO:0050896);; biological process: localization (GO:0051179);; molecular function: transporter activity (GO:0005215);; cellular component: membrane (GO:0016020);; cellular component: membrane part (GO:0044425)
EVM0032950	EVM0032950	10.7911	4.61422	1.94593	4.23555e-13	-1.68166	down	0.00186557	-0.749339	down	0.769374	-0.726858	normal	[J]	Translation, ribosomal structure and biogenesis	Molecular Function: copper ion binding (GO:0005507);; Biological Process: translation (GO:0006412);; Molecular Function: methyltransferase activity (GO:0008168);; Biological Process: methylation (GO:0032259);;	--	--	[J]	Translation, ribosomal structure and biogenesis	Mitochondrial small ribosomal subunit Rsm22;; Methyltransferase domain	--	J	Translation, ribosomal structure and biogenesis	methyltransferase-like protein 17, mitochondrial [Quercus suber]	molecular function: binding (GO:0005488);; biological process: metabolic process (GO:0008152);; biological process: cellular process (GO:0009987);; molecular function: catalytic activity (GO:0003824)
EVM0028621	EVM0028621	34.4755	9.30044	0.858641	1.45431e-49	-4.5235	down	8.74274e-09	-1.40463	down	0.000243628	-2.59127	down	[I]	Lipid transport and metabolism	Biological Process: pentacyclic triterpenoid biosynthetic process (GO:0019745);; Molecular Function: beta-amyrin synthase activity (GO:0042300);;	K15813|0|pper:PRUPE_ppa001812mg|K15813 beta-amyrin synthase [EC:5.4.99.39] | (RefSeq) hypothetical protein	Sesquiterpenoid and triterpenoid biosynthesis (ko00909)	[I]	Lipid transport and metabolism	Squalene-hopene cyclase C-terminal domain;; Squalene-hopene cyclase N-terminal domain;; Prenyltransferase and squalene oxidase repeat;; Pectic acid lyase	Beta-amyrin synthase OS=Betula platyphylla OX=78630 GN=OSCBPY PE=1 SV=1	I	Lipid transport and metabolism	beta-amyrin synthase-like [Quercus suber]	biological process: metabolic process (GO:0008152);; biological process: cellular process (GO:0009987);; biological process: single-organism process (GO:0044699);; molecular function: catalytic activity (GO:0003824)
EVM0000016	EVM0000016	0.647925	0.177873	0.05107	7.24568e-05	-2.66063	down	0.086459	-1.29484	normal	--	--	--	--	--	--	--	--	[T]	Signal transduction mechanisms	--	Putative disease resistance RPP13-like protein 1 OS=Arabidopsis thaliana OX=3702 GN=RPPL1 PE=3 SV=1	S	Function unknown	putative disease resistance rpp13-like protein 1 [Quercus suber]	--
EVM0026380	EVM0026380	43.6094	5.03334	3.14625	1.42969e-76	-2.99334	down	5.1606e-60	-2.63536	down	0.963593	-0.275711	normal	--	--	--	K11699|0|vvi:100260997|K11699 RNA-dependent RNA polymerase [EC:2.7.7.48] | (RefSeq) probable RNA-dependent RNA polymerase 5	--	[A]	RNA processing and modification	RNA dependent RNA polymerase	Probable RNA-dependent RNA polymerase 5 OS=Arabidopsis thaliana OX=3702 GN=RDR5 PE=2 SV=2	K	Transcription	probable RNA-dependent RNA polymerase 5 [Quercus suber]	--
EVM0002110	EVM0002110	3.39717	23.612	17.1561	1.38704e-22	3.12598	up	5.03104e-20	3.23347	up	0.993553	-0.0855122	normal	[QV]	Secondary metabolites biosynthesis, transport and catabolism;; Defense mechanisms	Molecular Function: monooxygenase activity (GO:0004497);; Molecular Function: iron ion binding (GO:0005506);; Cellular Component: integral component of membrane (GO:0016021);; Molecular Function: oxidoreductase activity, acting on paired donors, with incorporation or reduction of molecular oxygen (GO:0016705);; Molecular Function: heme binding (GO:0020037);; Biological Process: oxidation-reductio…	--	--	[QI]	Secondary metabolites biosynthesis, transport and catabolism;; Lipid transport and metabolism	Cytochrome P450	Cytochrome P450 CYP749A22 OS=Panax ginseng OX=4054 PE=2 SV=1	Q	Secondary metabolites biosynthesis, transport and catabolism	cytochrome P450 CYP749A22-like [Quercus suber]	molecular function: catalytic activity (GO:0003824);; biological process: metabolic process (GO:0008152);; biological process: single-organism process (GO:0044699);; molecular function: binding (GO:0005488);; cellular component: membrane (GO:0016020);; cellular component: membrane part (GO:0044425)
EVM0014637	EVM0014637	173.744	71.3707	10.6574	6.79175e-22	-3.26241	down	1.5987e-05	-0.803922	down	0.000863289	-2.1316	down	--	--	Molecular Function: DNA binding (GO:0003677);; Cellular Component: nucleus (GO:0005634);;	--	--	--	--	SBP domain	Squamosa promoter-binding-like protein 13B OS=Arabidopsis thaliana OX=3702 GN=SPL13B PE=3 SV=1	S	Function unknown	squamosa promoter-binding-like protein 13A [Quercus suber]	molecular function: binding (GO:0005488);; cellular component: cell (GO:0005623);; cellular component: organelle (GO:0043226);; cellular component: cell part (GO:0044464)
EVM0010914	EVM0010914	84.0879	23.7695	15.1024	1.11562e-15	-1.70096	down	1.26407e-22	-1.34822	down	0.953452	-0.280546	normal	--	--	--	--	--	--	--	Weak chloroplast movement under blue light	WEB family protein At5g16730, chloroplastic OS=Arabidopsis thaliana OX=3702 GN=At5g16730 PE=1 SV=1	S	Function unknown	WEB family protein At5g16730, chloroplastic-like [Quercus suber]	--
Castanea_mollissima_newGene_5366	--	6.99712	1.38883	0.490994	9.54055e-15	-2.97183	down	4.0547e-06	-1.80971	down	0.916236	-0.606547	normal	--	--	--	--	--	--	--	--	--	--	--	hypothetical protein CFP56_60147 [Quercus suber]	--
EVM0030465	EVM0030465	20.3901	33.5759	36.8054	1.48759e-16	1.69049	up	2.27712e-13	1.18757	up	0.816832	0.485707	normal	--		Molecular Function: protein serine/threonine kinase activity (GO:0004674);; Molecular Function: ATP binding (GO:0005524);; Biological Process: protein phosphorylation (GO:0006468);; Cellular Component: integral component of membrane (GO:0016021);; Molecular Function: carbohydrate binding (GO:0030246);;	K04733|0|pmum:103340487|K04733 interleukin-1 receptor-associated kinase 4 [EC:2.7.11.1] | (RefSeq) probable L-type lectin-domain containing receptor kinase S.5	--	--	--	Protein kinase domain;; Legume lectin domain;; Protein tyrosine kinase	Probable L-type lectin-domain containing receptor kinase S.5 OS=Arabidopsis thaliana OX=3702 GN=LECRKS5 PE=2 SV=1	T	Signal transduction mechanisms	probable L-type lectin-domain containing receptor kinase S.5 [Quercus suber]	molecular function: catalytic activity (GO:0003824);; biological process: metabolic process (GO:0008152);; biological process: cellular process (GO:0009987);; molecular function: binding (GO:0005488);; cellular component: membrane (GO:0016020);; cellular component: membrane part (GO:0044425)
EVM0015019	EVM0015019	3.28025	1.04985	0.741004	0.000291025	-1.37494	down	0.000593154	-1.14893	down	0.993553	-0.130098	normal	--	--	Biological Process: protein transport (GO:0015031);; Cellular Component: integral component of membrane (GO:0016021);;	--	--	[R]	General function prediction only	PPR repeat family;; PPR repeat;; PPR repeat;; Pentatricopeptide repeat domain;; Pentacotripeptide-repeat region of PRORP;; Tetratricopeptide repeat;; Region in Clathrin and VPS;; Tetratricopeptide repeat	Pentatricopeptide repeat-containing protein At1g73710 OS=Arabidopsis thaliana OX=3702 GN=At1g73710 PE=2 SV=1	S	Function unknown	pentatricopeptide repeat-containing protein At1g73710 [Quercus suber]	biological process: localization (GO:0051179);; cellular component: membrane (GO:0016020);; cellular component: membrane part (GO:0044425)
EVM0028937	EVM0028937	2.23755	4.3944	2.42193	0.000286973	0.927247	up	1.07966e-05	1.4347	up	0.918358	-0.415294	normal	[K]	Transcription	--	--	--	[R]	General function prediction only	Leucine rich repeat;; Leucine Rich repeats (2 copies);; Leucine Rich Repeat;; Leucine rich repeat N-terminal domain	Receptor-like protein 6 OS=Arabidopsis thaliana OX=3702 GN=RLP6 PE=3 SV=1	S	Function unknown	receptor-like protein 12 [Quercus suber]	--
EVM0024090	EVM0024090	5.20369	1.71332	0.584126	1.99438e-13	-2.34977	down	0.000417973	-1.11388	down	0.652449	-0.92152	normal	[K]	Transcription	Molecular Function: protein serine/threonine kinase activity (GO:0004674);; Molecular Function: ATP binding (GO:0005524);; Cellular Component: plasma membrane (GO:0005886);; Biological Process: protein phosphorylation (GO:0006468);; Cellular Component: integral component of membrane (GO:0016021);;	--	--	--	--	Di-glucose binding within endoplasmic reticulum;; Protein tyrosine kinase;; Protein kinase domain;; Leucine rich repeat	Probable LRR receptor-like serine/threonine-protein kinase At1g56130 OS=Arabidopsis thaliana OX=3702 GN=At1g56130 PE=2 SV=2	T	Signal transduction mechanisms	probable LRR receptor-like serine/threonine-protein kinase At1g56140 isoform X2 [Quercus suber]	molecular function: catalytic activity (GO:0003824);; biological process: metabolic process (GO:0008152);; biological process: cellular process (GO:0009987);; molecular function: binding (GO:0005488);; cellular component: cell (GO:0005623);; cellular component: membrane (GO:0016020);; cellular component: cell part (GO:0044464);; cellular component: membrane part (GO:0044425)
EVM0014374	EVM0014374	0.304382	0.498596	0.118411	--	--	--	--	--	--	--	--	--	[O]	Posttranslational modification, protein turnover, chaperones	--	--	--	[O]	Posttranslational modification, protein turnover, chaperones	Papain family cysteine protease;; Cathepsin propeptide inhibitor domain (I29);; Peptidase C1-like family	Senescence-specific cysteine protease SAG12 OS=Arabidopsis thaliana OX=3702 GN=SAG12 PE=1 SV=1	O	Posttranslational modification, protein turnover, chaperones	zingipain-2-like [Quercus suber]	--
EVM0005818	EVM0005818	8.97813	4.79034	3.30737	0.00611307	-0.650243	down	0.142138	-0.432129	normal	0.990295	-0.147484	normal	[T]	Signal transduction mechanisms	Cellular Component: proteasome complex (GO:0000502);; Cellular Component: cell wall (GO:0005618);;	K06694|3.65113e-139|jcu:105630516|K06694 26S proteasome non-ATPase regulatory subunit 10 | (RefSeq) 26S proteasome non-ATPase regulatory subunit 10	--	[O]	Posttranslational modification, protein turnover, chaperones	Ankyrin repeats (many copies);; Ankyrin repeats (3 copies);; Ankyrin repeat;; Ankyrin repeat;; Ankyrin repeats (many copies)	Potassium channel GORK OS=Arabidopsis thaliana OX=3702 GN=GORK PE=1 SV=2	S	Function unknown	26S proteasome non-ATPase regulatory subunit 10 [Quercus suber]	cellular component: cell (GO:0005623);; cellular component: macromolecular complex (GO:0032991);; cellular component: cell part (GO:0044464)
EVM0006216	EVM0006216	3.12478	0.727504	0.531764	2.75144e-05	-1.7569	down	6.36405e-05	-1.58421	down	0.995177	-0.0743274	normal	--	--	Molecular Function: RNA polymerase II regulatory region sequence-specific DNA binding (GO:0000977);; Molecular Function: transcription factor activity, sequence-specific DNA binding (GO:0003700);; Cellular Component: nucleus (GO:0005634);; Biological Process: regulation of transcription from RNA polymerase II promoter (GO:0006357);;	--	--	[L]	Replication, recombination and repair	Domain of unknown function (DUF4413);; hAT family C-terminal dimerisation region	Zinc finger BED domain-containing protein RICESLEEPER 2 OS=Oryza sativa subsp. japonica OX=39947 GN=Os03g0733400 PE=2 SV=1	S	Function unknown	zinc finger BED domain-containing protein RICESLEEPER 2-like [Quercus suber]	molecular function: binding (GO:0005488);; molecular function: nucleic acid binding transcription factor activity (GO:0001071);; biological process: biological regulation (GO:0065007);; cellular component: cell (GO:0005623);; cellular component: organelle (GO:0043226);; cellular component: cell part (GO:0044464)
EVM0002833	EVM0002833	9.64105	1.2287	0.905478	2.2432e-26	-2.59854	down	8.90046e-18	-2.471	down	0.995321	-0.0550385	normal	[R]	General function prediction only	Molecular Function: zinc ion binding (GO:0008270);;	K18164|0|vvi:100266373|K18164 NADH dehydrogenase [ubiquinone] 1 alpha subcomplex assembly factor 7 | (RefSeq) protein arginine methyltransferase NDUFAF7 homolog, mitochondrial	--	[S]	Function unknown	Putative S-adenosyl-L-methionine-dependent methyltransferase	--	S	Function unknown	protein arginine methyltransferase NDUFAF7, mitochondrial isoform X1 [Quercus suber]	molecular function: binding (GO:0005488)
EVM0010575	EVM0010575	4.82705	8.61584	6.32557	5.47798e-05	1.21498	up	0.000132352	1.28858	up	0.995177	-0.0437731	normal	--	--	--	--	--	--	--	Cotton fibre expressed protein	--	S	Function unknown	protein BNI1-like [Quercus suber]	--
EVM0033165	EVM0033165	25.2369	37.4731	46.7539	2.90467e-10	1.74478	up	3.56938e-08	1.0379	up	0.645453	0.662926	normal	--	--	--	--	--	--	--	Myb-like DNA-binding domain	AT-rich interactive domain-containing protein 2 OS=Arabidopsis thaliana OX=3702 GN=ARID2 PE=1 SV=1	S	Function unknown	uncharacterized protein LOC111990920 [Quercus suber]	--
EVM0004357	EVM0004357	1.56629	7.07294	10.3369	2.37702e-15	3.49371	up	0.0004102	2.5005	up	0.761857	0.744501	normal	--	--	--	--	--	--	--	--	--	S	Function unknown	late embryogenesis abundant protein 2-like [Quercus suber]	--
EVM0029315	EVM0029315	10.3857	4.49137	2.95042	0.000135535	-1.04418	down	0.00300159	-0.733315	down	0.981513	-0.222971	normal	[J]	Translation, ribosomal structure and biogenesis	Biological Process: RNA methylation (GO:0001510);; Biological Process: RNA processing (GO:0006396);; Molecular Function: RNA methyltransferase activity (GO:0008173);;	--	--	--	--	Methyltransferase small domain;; Conserved hypothetical protein 95	--	J	Translation, ribosomal structure and biogenesis	uncharacterized protein LOC111991953 [Quercus suber]	biological process: metabolic process (GO:0008152);; biological process: cellular process (GO:0009987);; molecular function: catalytic activity (GO:0003824)
EVM0002727	EVM0002727	2.91724	0.053106	0.0187015	2.24871e-07	-5.39134	down	4.15935e-06	-4.23148	down	--	--	--	--	--	--	--	--	--	--	--	--	--	--	uncharacterized protein LOC111998566 [Quercus suber]	--
EVM0014108	EVM0014108	122.657	18.5081	3.51738	5.55813e-64	-4.3487	down	1.14206e-64	-2.25216	down	0.0036882	-1.83799	down	--	--	--	--	--	--	--	KIP1-like protein	Protein NETWORKED 1A OS=Arabidopsis thaliana OX=3702 GN=NET1A PE=1 SV=1	S	Function unknown	protein NETWORKED 1A-like isoform X3 [Quercus suber]	--
EVM0027341	EVM0027341	3.79481	5.60022	7.2023	1.8064e-07	1.76252	up	0.0264208	1.00865	normal	0.850354	0.619003	normal	--	--	--	--	--	--	--	--	--	S	Function unknown	hypothetical protein CFP56_79127 [Quercus suber]	--
EVM0019826	EVM0019826	49.8655	4.66641	2.13363	1.0256e-34	-3.65318	down	1.02032e-56	-2.93025	down	0.890563	-0.55564	normal	[DPM]	Cell cycle control, cell division, chromosome partitioning;; Inorganic ion transport and metabolism;; Cell wall/membrane/envelope biogenesis	Molecular Function: copper ion binding (GO:0005507);; Molecular Function: L-ascorbate oxidase activity (GO:0008447);; Cellular Component: plant-type cell wall (GO:0009505);; Cellular Component: plasmodesma (GO:0009506);; Cellular Component: integral component of membrane (GO:0016021);; Molecular Function: oxidoreductase activity, oxidizing metal ions (GO:0016722);; Cellular Component: anchored co…	--	--	[Q]	Secondary metabolites biosynthesis, transport and catabolism	Multicopper oxidase;; Multicopper oxidase;; Multicopper oxidase	Monocopper oxidase-like protein SKU5 OS=Arabidopsis thaliana OX=3702 GN=SKU5 PE=1 SV=1	Q	Secondary metabolites biosynthesis, transport and catabolism	monocopper oxidase-like protein SKU5 [Quercus suber]	molecular function: binding (GO:0005488);; molecular function: catalytic activity (GO:0003824);; biological process: metabolic process (GO:0008152);; biological process: single-organism process (GO:0044699);; cellular component: cell (GO:0005623);; cellular component: cell part (GO:0044464);; cellular component: cell junction (GO:0030054);; cellular component: membrane (GO:0016020);; cellular com…
EVM0030621	EVM0030621	22.3278	105.317	67.5376	3.6674e-08	2.44983	up	0.000218728	2.58597	up	0.97655	-0.194383	normal	[E]	Amino acid transport and metabolism	Molecular Function: cysteine synthase activity (GO:0004124);; Molecular Function: copper ion binding (GO:0005507);; Cellular Component: mitochondrion (GO:0005739);; Biological Process: cysteine biosynthetic process from serine (GO:0006535);; Biological Process: immune response (GO:0006955);; Cellular Component: chloroplast (GO:0009507);; Molecular Function: transferase activity (GO:0016740);; Bio…	K13034|0|gra:105802709|K13034 L-3-cyanoalanine synthase/ cysteine synthase [EC:2.5.1.47 4.4.1.9] | (RefSeq) bifunctional L-3-cyanoalanine synthase/cysteine synthase 1, mitochondrial-like	Cysteine and methionine metabolism (ko00270);; Cyanoamino acid metabolism (ko00460);; Sulfur metabolism (ko00920);; Carbon metabolism (ko01200);; Biosynthesis of amino acids (ko01230)	[E]	Amino acid transport and metabolism	Pyridoxal-phosphate dependent enzyme	L-3-cyanoalanine synthase 1, mitochondrial OS=Malus domestica OX=3750 GN=CAS1 PE=1 SV=1	E	Amino acid transport and metabolism	bifunctional L-3-cyanoalanine synthase/cysteine synthase 1, mitochondrial [Quercus suber]	molecular function: catalytic activity (GO:0003824);; molecular function: binding (GO:0005488);; cellular component: cell (GO:0005623);; cellular component: organelle (GO:0043226);; cellular component: cell part (GO:0044464);; biological process: metabolic process (GO:0008152);; biological process: cellular process (GO:0009987);; biological process: single-organism process (GO:0044699);; biologic…
EVM0025687	EVM0025687	3.23614	21.2169	12.4384	2.18048e-06	2.61465	up	2.13739e-13	3.13207	up	0.932623	-0.403153	normal	--	--	Molecular Function: DNA binding (GO:0003677);;	K09422|0|vvi:100240910|K09422 myb proto-oncogene protein, plant | (RefSeq) transcription factor MYB86	--	[K]	Transcription	Myb-like DNA-binding domain;; Myb-like DNA-binding domain	Transcription factor MYB61 OS=Arabidopsis thaliana OX=3702 GN=MYB61 PE=2 SV=1	K	Transcription	transcription factor MYB61-like [Quercus suber]	molecular function: binding (GO:0005488)
Castanea_mollissima_newGene_4809	--	0	1.30514	3.01114	9.18466e-10	9.17447	up	1.2681e-05	6.21229	up	0.568097	1.08376	normal	--	--	Biological Process: carbohydrate metabolic process (GO:0005975);; Molecular Function: glucan endo-1,3-beta-D-glucosidase activity (GO:0042973);;	--	--	--	--	Glycosyl hydrolases family 17;; Glycosyl hydrolases family 17	Glucan endo-1,3-beta-glucosidase OS=Vitis vinifera OX=29760 GN=VIT_06s0061g00120 PE=1 SV=2	G	Carbohydrate transport and metabolism	glucan endo-1,3-beta-glucosidase-like [Quercus suber]	biological process: metabolic process (GO:0008152);; molecular function: catalytic activity (GO:0003824)
EVM0019332	EVM0019332	0.974575	0.632632	0.06104	0.000735047	-3.08169	down	0.857366	-0.133425	normal	0.666961	-0.976677	normal	[K]	Transcription	--	K13457|4.10749e-166|rcu:8289736|K13457 disease resistance protein RPM1 | (RefSeq) disease resistance protein RPM1	Plant-pathogen interaction (ko04626)	[T]	Signal transduction mechanisms	NB-ARC domain	Disease resistance protein RPM1 OS=Arabidopsis thaliana OX=3702 GN=RPM1 PE=1 SV=1	S	Function unknown	disease resistance protein RPM1-like [Quercus suber]	--
EVM0020644	EVM0020644	6.51319	1.02016	0.119384	3.07568e-39	-4.80736	down	2.66648e-15	-2.17584	down	0.368951	-1.46	normal	--	--	--	--	--	--	--	--	--	S	Function unknown	titin homolog isoform X1 [Quercus suber]	--
EVM0005899	EVM0005899	12.2292	1.45575	0.123511	3.38892e-41	-5.66949	down	3.93608e-18	-2.57016	down	0.223004	-1.71114	normal	--	--	--	--	--	--	--	SBP domain	Squamosa promoter-binding-like protein 7 OS=Oryza sativa subsp. japonica OX=39947 GN=SPL7 PE=2 SV=2	K	Transcription	squamosa promoter-binding-like protein 7 [Quercus suber]	--
EVM0004908	EVM0004908	16.2915	37.5633	35.9701	2.61734e-24	1.96944	up	2.55002e-15	1.67406	up	0.943043	0.296261	normal	--	--	Cellular Component: plasma membrane (GO:0005886);; Cellular Component: plasmodesma (GO:0009506);;	--	--	--	--	Cleavage site for pathogenic type III effector avirulence factor Avr	RPM1-interacting protein 4 OS=Arabidopsis thaliana OX=3702 GN=RIN4 PE=1 SV=1	S	Function unknown	RPM1-interacting protein 4-like [Quercus suber]	cellular component: cell (GO:0005623);; cellular component: membrane (GO:0016020);; cellular component: cell part (GO:0044464);; cellular component: cell junction (GO:0030054)
EVM0004261	EVM0004261	16.6787	21.7705	20.1473	6.49102e-07	1.12009	up	3.15132e-09	0.854648	up	0.954471	0.269376	normal	[R]	General function prediction only	Molecular Function: metalloendopeptidase activity (GO:0004222);; Cellular Component: mitochondrion (GO:0005739);; Molecular Function: zinc ion binding (GO:0008270);; Cellular Component: chloroplast stroma (GO:0009570);; Biological Process: embryo development ending in seed dormancy (GO:0009793);; Biological Process: protein processing (GO:0016485);;	--	--	[O]	Posttranslational modification, protein turnover, chaperones	Peptidase M16 inactive domain;; Insulinase (Peptidase family M16)	Stromal processing peptidase, chloroplastic OS=Pisum sativum OX=3888 GN=SPP PE=1 SV=2	O	Posttranslational modification, protein turnover, chaperones	stromal processing peptidase, chloroplastic [Quercus suber]	molecular function: catalytic activity (GO:0003824);; biological process: metabolic process (GO:0008152);; cellular component: cell (GO:0005623);; cellular component: organelle (GO:0043226);; cellular component: cell part (GO:0044464);; molecular function: binding (GO:0005488);; cellular component: organelle part (GO:0044422);; biological process: reproduction (GO:0000003);; biological process: r…
EVM0005914	EVM0005914	1.27568	8.58345	8.4149	3.18258e-63	3.52274	up	2.85292e-24	3.17975	up	0.94699	0.313088	normal	[R]	General function prediction only	Molecular Function: binding (GO:0005488);; Molecular Function: kinase activity (GO:0016301);;	--	--	--	--	Legume lectin domain;; Protein kinase domain;; Protein tyrosine kinase;; Legume-like lectin family	L-type lectin-domain containing receptor kinase IX.1 OS=Arabidopsis thaliana OX=3702 GN=LECRK91 PE=1 SV=1	T	Signal transduction mechanisms	L-type lectin-domain containing receptor kinase IX.1-like [Quercus suber]	molecular function: binding (GO:0005488);; molecular function: catalytic activity (GO:0003824)
EVM0007580	EVM0007580	26.4	80.9567	120.01	2.10219e-16	3.05803	up	1.6782e-23	2.08317	up	0.423444	0.893412	normal	--	--	Biological Process: defense response (GO:0006952);;	--	--	--	--	Hs1pro-1 protein C-terminus;; Hs1pro-1 N-terminus	Nematode resistance protein-like HSPRO2 OS=Arabidopsis thaliana OX=3702 GN=HSPRO2 PE=1 SV=1	S	Function unknown	nematode resistance protein-like HSPRO2 [Quercus suber]	biological process: response to stimulus (GO:0050896)
EVM0021803	EVM0021803	12.4927	6.21914	2.08456	1.28465e-08	-1.79829	down	0.117718	-0.528586	normal	0.585708	-0.971427	normal	[IR]	Lipid transport and metabolism;; General function prediction only	Molecular Function: hydrolase activity, acting on ester bonds (GO:0016788);;	--	--	--	--	GDSL-like Lipase/Acylhydrolase	GDSL esterase/lipase At5g14450 OS=Arabidopsis thaliana OX=3702 GN=At5g14450 PE=2 SV=1	--	--	GDSL esterase/lipase At5g14450-like [Quercus suber]	molecular function: catalytic activity (GO:0003824)
EVM0029778	EVM0029778	0.70076	0	0	0.000214383	-6.3051	down	0.000223644	-4.96366	down	--	--	--	--	--	--	--	--	--	--	--	Protein BIG GRAIN 1-like C OS=Arabidopsis thaliana OX=3702 GN=At3g42800 PE=2 SV=1	S	Function unknown	protein BIG GRAIN 1-like A [Quercus suber]	--
Castanea_mollissima_newGene_5798	--	4.1112	2.0073	0.969519	0.000148725	-1.48247	down	0.0466467	-0.631846	normal	0.888748	-0.607691	normal	--	--	--	--	--	[R]	General function prediction only	zinc-binding in reverse transcriptase	Putative ribonuclease H protein At1g65750 OS=Arabidopsis thaliana OX=3702 GN=At1g65750 PE=3 SV=1	S	Function unknown	putative ribonuclease h protein [Quercus suber]	--
EVM0018836	EVM0018836	10.3603	0	0	1.55951e-10	-9.35217	down	3.86293e-13	-8.05711	down	--	--	--	--	--	Molecular Function: transcription factor activity, sequence-specific DNA binding (GO:0003700);; Cellular Component: nucleus (GO:0005634);; Biological Process: regulation of transcription, DNA-templated (GO:0006355);; Molecular Function: sequence-specific DNA binding (GO:0043565);;	K09419|2.58954e-137|gmx:100806150|K09419 heat shock transcription factor, other eukaryote | (RefSeq) heat stress transcription factor B-4b-like	--	[K]	Transcription	HSF-type DNA-binding	Heat stress transcription factor B-4b OS=Oryza sativa subsp. japonica OX=39947 GN=HSFB4B PE=1 SV=1	K	Transcription	heat stress transcription factor B-4b-like [Quercus suber]	molecular function: nucleic acid binding transcription factor activity (GO:0001071);; biological process: biological regulation (GO:0065007);; cellular component: cell (GO:0005623);; cellular component: organelle (GO:0043226);; cellular component: cell part (GO:0044464);; molecular function: binding (GO:0005488)
EVM0028043	EVM0028043	0.04011	0.575976	0.840793	1.07773e-08	5.07166	up	0.00371047	3.60268	up	0.883243	0.660533	normal	[T]	Signal transduction mechanisms	--	--	--	--	--	Protein tyrosine kinase;; Protein kinase domain;; D-mannose binding lectin;; S-locus glycoprotein domain;; PAN-like domain;; Domain of unknown function (DUF3403)	G-type lectin S-receptor-like serine/threonine-protein kinase At4g27290 OS=Arabidopsis thaliana OX=3702 GN=At4g27290 PE=3 SV=4	T	Signal transduction mechanisms	G-type lectin S-receptor-like serine/threonine-protein kinase At4g27290 [Quercus suber]	--
EVM0014606	EVM0014606	9.6255	15.8506	8.33193	0.0541291	0.58844	normal	0.000548475	1.18586	up	0.871629	-0.493875	normal	--	--	Molecular Function: DNA helicase activity (GO:0003678);; Biological Process: DNA repair (GO:0006281);; Cellular Component: intracellular organelle (GO:0043229);;	--	--	--	--	Protein of unknown function (DUF295)	Putative F-box protein At1g65770 OS=Arabidopsis thaliana OX=3702 GN=At1g65770 PE=4 SV=1	S	Function unknown	F-box protein SKIP23-like [Quercus suber]	molecular function: catalytic activity (GO:0003824);; biological process: metabolic process (GO:0008152);; biological process: cellular process (GO:0009987);; biological process: response to stimulus (GO:0050896);; cellular component: cell (GO:0005623);; cellular component: organelle (GO:0043226);; cellular component: cell part (GO:0044464)
Castanea_mollissima_newGene_6699	--	14.3754	5.80844	3.48627	3.17215e-07	-1.2552	down	0.000628181	-0.826341	down	0.954088	-0.330413	normal	--	--	Molecular Function: DNA binding (GO:0003677);;	--	--	[L]	Replication, recombination and repair	hAT family C-terminal dimerisation region;; Domain of unknown function (DUF4413);; BED zinc finger	Zinc finger BED domain-containing protein RICESLEEPER 2 OS=Oryza sativa subsp. japonica OX=39947 GN=Os03g0733400 PE=2 SV=1	S	Function unknown	zinc finger BED domain-containing protein RICESLEEPER 1-like [Quercus suber]	molecular function: binding (GO:0005488)
EVM0028743	EVM0028743	10.0486	4.52144	1.34387	1.78465e-21	-2.09827	down	0.0061825	-0.677448	down	0.457831	-1.09865	normal	[DZ]	Cell cycle control, cell division, chromosome partitioning;; Cytoskeleton	--	--	--	[S]	Function unknown	Regulator of chromosome condensation (RCC1) repeat;; Regulator of chromosome condensation (RCC1) repeat	Ultraviolet-B receptor UVR8 OS=Arabidopsis thaliana OX=3702 GN=UVR8 PE=1 SV=1	DZ	Cell cycle control, cell division, chromosome partitioning;; Cytoskeleton	ultraviolet-B receptor UVR8 isoform X1 [Quercus suber]	--
EVM0002631	EVM0002631	25.1333	95.4416	184.778	5.75601e-57	3.72037	up	1.12948e-51	2.391	up	0.0697564	1.23784	normal	--	--	--	K14488|2.79919e-65|mdm:103418405|K14488 SAUR family protein | (RefSeq) auxin-responsive protein SAUR36-like	Plant hormone signal transduction (ko04075)	--	--	Auxin responsive protein	Auxin-responsive protein SAUR36 OS=Arabidopsis thaliana OX=3702 GN=SAUR36 PE=2 SV=1	S	Function unknown	auxin-responsive protein SAUR36 [Quercus suber]	--
EVM0014336	EVM0014336	0	9.59628	66.3973	5.1286e-21	13.2509	up	4.16936e-21	9.97299	up	4.23959e-05	2.72469	up	--	--	--	--	--	--	--	Thaumatin family	Thaumatin-like protein 1 OS=Pyrus pyrifolia OX=3767 GN=TL1 PE=1 SV=1	S	Function unknown	thaumatin-like protein 1b [Quercus suber]	--
EVM0009568	EVM0009568	2.31594	0.930191	0.649832	0.00236621	-1.04732	down	0.0350382	-0.825003	normal	0.993851	-0.12401	normal	[O]	Posttranslational modification, protein turnover, chaperones	Molecular Function: serine-type endopeptidase activity (GO:0004252);; Cellular Component: cell wall (GO:0005618);; Biological Process: proteolysis (GO:0006508);;	--	--	--	--	Subtilase family;; Peptidase inhibitor I9;; PA domain	Subtilisin-like protease SBT1.7 OS=Arabidopsis thaliana OX=3702 GN=SBT1.7 PE=1 SV=1	O	Posttranslational modification, protein turnover, chaperones	subtilisin-like protease SBT1.7 [Quercus suber]	molecular function: catalytic activity (GO:0003824);; biological process: metabolic process (GO:0008152);; cellular component: cell (GO:0005623);; cellular component: cell part (GO:0044464)
EVM0030124	EVM0030124	0.440954	2.26498	0.558207	--	--	--	2.2982e-05	2.67024	up	0.628082	-1.0738	normal	--	--	Cellular Component: membrane (GO:0016020);;	--	--	[R]	General function prediction only	Glycosyl transferase family 90	--	S	Function unknown	LOW QUALITY PROTEIN: protein O-glucosyltransferase 1-like [Quercus suber]	cellular component: membrane (GO:0016020)
EVM0032749	EVM0032749	26.313	38.6347	43.2943	1.19727e-17	1.55351	up	2.30957e-10	1.0257	up	0.787376	0.510083	normal	--	--	Cellular Component: cytoplasm (GO:0005737);;	--	--	[K]	Transcription	PurA ssDNA and RNA-binding protein;; Protein of unknown function (DUF3276)	Transcription factor Pur-alpha 1 OS=Arabidopsis thaliana OX=3702 GN=PURA1 PE=1 SV=2	K	Transcription	transcription factor Pur-alpha 1 [Quercus suber]	cellular component: cell (GO:0005623);; cellular component: cell part (GO:0044464)
EVM0016765	EVM0016765	5.32221	1.4914	1.85799	0.00727807	-0.742921	down	6.35105e-06	-1.3491	down	0.908092	0.519639	normal	[K]	Transcription	--	--	--	[R]	General function prediction only	WD domain, G-beta repeat;; Nucleoporin Nup120/160	Zinc finger CCCH domain-containing protein 17 OS=Oryza sativa subsp. japonica OX=39947 GN=Os02g0677700 PE=2 SV=2	S	Function unknown	zinc finger CCCH domain-containing protein 48-like isoform X2 [Quercus suber]	--
EVM0015301	EVM0015301	9.91452	3.65958	1.97934	5.88851e-07	-1.47616	down	0.00238672	-0.959325	down	0.950016	-0.383971	normal	--	--	Molecular Function: aspartic-type endopeptidase activity (GO:0004190);; Biological Process: proteolysis (GO:0006508);; Biological Process: protein catabolic process (GO:0030163);;	--	--	[O]	Posttranslational modification, protein turnover, chaperones	Xylanase inhibitor N-terminal;; Eukaryotic aspartyl protease;; Xylanase inhibitor C-terminal	Aspartyl protease family protein At5g10770 OS=Arabidopsis thaliana OX=3702 GN=At5g10770 PE=2 SV=1	O	Posttranslational modification, protein turnover, chaperones	aspartyl protease family protein At5g10770-like [Quercus suber]	molecular function: catalytic activity (GO:0003824);; biological process: metabolic process (GO:0008152)
EVM0022691	EVM0022691	15.571	30.2641	29.9396	1.39601e-20	1.73309	up	1.03181e-13	1.42649	up	0.929509	0.313641	normal	--	--	--	--	--	--	--	Domain of unknown function (DUF4378)	Protein LONGIFOLIA 2 OS=Arabidopsis thaliana OX=3702 GN=LNG2 PE=1 SV=1	S	Function unknown	protein LONGIFOLIA 2-like isoform X1 [Quercus suber]	--
EVM0017249	EVM0017249	1.40342	10.3206	8.32424	1.584e-11	3.26482	up	0.000123401	3.10247	up	0.996815	0.0199939	normal	[H]	Coenzyme transport and metabolism	Biological Process: chlorophyll biosynthetic process (GO:0015995);; Molecular Function: magnesium chelatase activity (GO:0016851);;	K03403|0|pmum:103322036|K03403 magnesium chelatase subunit H [EC:6.6.1.1] | (RefSeq) magnesium-chelatase subunit ChlH, chloroplastic	Porphyrin and chlorophyll metabolism (ko00860)	--	--	CobN/Magnesium Chelatase;; Domain of unknown function (DUF3479)	Magnesium-chelatase subunit ChlH, chloroplastic OS=Arabidopsis thaliana OX=3702 GN=CHLH PE=1 SV=1	H	Coenzyme transport and metabolism	magnesium-chelatase subunit ChlH, chloroplastic [Quercus suber]	biological process: metabolic process (GO:0008152);; biological process: cellular process (GO:0009987);; biological process: single-organism process (GO:0044699);; molecular function: catalytic activity (GO:0003824)
EVM0025415	EVM0025415	10.8327	4.15477	1.78116	7.36902e-06	-1.85204	down	0.00056852	-0.902943	down	0.82014	-0.703229	normal	--	--	--	--	--	[R]	General function prediction only	PPR repeat;; PPR repeat family;; Pentatricopeptide repeat domain;; Tetratricopeptide repeat	Pentatricopeptide repeat-containing protein At4g21705, mitochondrial OS=Arabidopsis thaliana OX=3702 GN=At4g21705 PE=2 SV=1	S	Function unknown	pentatricopeptide repeat-containing protein At4g21705, mitochondrial [Quercus suber]	--
EVM0021059	EVM0021059	107.145	49.546	21.957	1.32791e-12	-1.46629	down	0.00465244	-0.63971	down	0.528652	-0.719794	normal	[O]	Posttranslational modification, protein turnover, chaperones	--	--	--	[O]	Posttranslational modification, protein turnover, chaperones	DnaJ domain	Chaperone protein dnaJ 49 OS=Arabidopsis thaliana OX=3702 GN=ATJ49 PE=2 SV=2	O	Posttranslational modification, protein turnover, chaperones	uncharacterized protein LOC112041130 isoform X1 [Quercus suber]	--
EVM0032775	EVM0032775	5.793	1.48447	0.233017	2.28872e-24	-3.73609	down	3.0542e-05	-1.46152	down	0.3963	-1.39535	normal	--	--	Cellular Component: nucleus (GO:0005634);;	K06627|0|tcc:TCM_038308|K06627 cyclin A | (RefSeq) Mitotic-like cyclin 3B from	--	[D]	Cell cycle control, cell division, chromosome partitioning	Cyclin, N-terminal domain;; Cyclin, C-terminal domain	Cyclin-A2-2 OS=Arabidopsis thaliana OX=3702 GN=CYCA2-2 PE=2 SV=1	D	Cell cycle control, cell division, chromosome partitioning	cyclin-A2-2-like [Quercus suber]	cellular component: cell (GO:0005623);; cellular component: organelle (GO:0043226);; cellular component: cell part (GO:0044464)
EVM0022181	EVM0022181	15.8406	4.64131	2.57641	2.53026e-16	-1.79723	down	3.34733e-07	-1.29009	down	0.936044	-0.391642	normal	[E]	Amino acid transport and metabolism	Molecular Function: transporter activity (GO:0005215);; Biological Process: transport (GO:0006810);; Cellular Component: integral component of membrane (GO:0016021);;	K14638|0|cit:102610070|K14638 solute carrier family 15 (peptide/histidine transporter), member 3/4 | (RefSeq) protein NRT1/ PTR FAMILY 2.11-like	--	[E]	Amino acid transport and metabolism	POT family	Protein NRT1/ PTR FAMILY 2.11 OS=Arabidopsis thaliana OX=3702 GN=NPF2.11 PE=1 SV=1	E	Amino acid transport and metabolism	protein NRT1/ PTR FAMILY 2.11-like [Quercus suber]	molecular function: transporter activity (GO:0005215);; biological process: localization (GO:0051179);; cellular component: membrane (GO:0016020);; cellular component: membrane part (GO:0044425)
EVM0026232	EVM0026232	29.4603	7.27255	6.05975	5.42958e-18	-1.47212	down	1.42856e-12	-1.53274	down	0.994485	0.0843397	normal	--	--	--	--	--	[V]	Defense mechanisms	--	--	S	Function unknown	uncharacterized protein LOC112019853 [Quercus suber]	--
Castanea_mollissima_newGene_4749	--	0.366243	1.68908	0.931689	0.000398648	1.97705	up	1.31035e-05	2.55817	up	0.931087	-0.460688	normal	--	--	--	--	--	--	--	--	--	S	Function unknown	hypothetical protein CFP56_51608 [Quercus suber]	--
EVM0003198	EVM0003198	9.95068	5.26708	1.87757	4.73076e-12	-1.58519	down	0.135911	-0.43454	normal	0.662602	-0.8784	normal	[J]	Translation, ribosomal structure and biogenesis	Molecular Function: translation elongation factor activity (GO:0003746);; Cellular Component: cytoplasm (GO:0005737);; Biological Process: translational elongation (GO:0006414);;	--	--	--	--	Elongation factor P (EF-P) KOW-like domain;; Elongation factor P, C-terminal;; Elongation factor P (EF-P) OB domain	--	J	Translation, ribosomal structure and biogenesis	uncharacterized protein LOC112000128 isoform X1 [Quercus suber]	molecular function: binding (GO:0005488);; biological process: metabolic process (GO:0008152);; biological process: cellular process (GO:0009987);; cellular component: cell (GO:0005623);; cellular component: cell part (GO:0044464)
EVM0030899	EVM0030899	49.8343	231.311	252.812	3.9924e-64	3.17055	up	6.13547e-50	2.6812	up	0.808001	0.476101	normal	[T]	Signal transduction mechanisms	Biological Process: response to stress (GO:0006950);;	--	--	--	--	Universal stress protein family	--	T	Signal transduction mechanisms	uncharacterized protein LOC111992529 isoform X2 [Quercus suber]	biological process: response to stimulus (GO:0050896)
EVM0016940	EVM0016940	26.9253	1.70009	0.153772	1.01726e-62	-6.54858	down	4.98542e-40	-3.4716	down	0.153907	-1.84575	normal	[M]	Cell wall/membrane/envelope biogenesis	Cellular Component: Golgi membrane (GO:0000139);; Cellular Component: integral component of membrane (GO:0016021);; Biological Process: pectin biosynthetic process (GO:0045489);; Molecular Function: polygalacturonate 4-alpha-galacturonosyltransferase activity (GO:0047262);; Biological Process: cell wall organization (GO:0071555);;	K20867|0|pper:PRUPE_ppa004043mg|K20867 galacturonosyltransferase 12/13/14/15 [EC:2.4.1.-] | (RefSeq) hypothetical protein	Starch and sucrose metabolism (ko00500);; Amino sugar and nucleotide sugar metabolism (ko00520)	--	--	Glycosyl transferase family 8	Probable galacturonosyltransferase 12 OS=Arabidopsis thaliana OX=3702 GN=GAUT12 PE=2 SV=1	G	Carbohydrate transport and metabolism	probable galacturonosyltransferase 12 [Quercus suber]	cellular component: cell (GO:0005623);; cellular component: membrane (GO:0016020);; cellular component: organelle (GO:0043226);; cellular component: organelle part (GO:0044422);; cellular component: cell part (GO:0044464);; cellular component: membrane part (GO:0044425);; biological process: metabolic process (GO:0008152);; biological process: single-organism process (GO:0044699);; molecular func…
Castanea_mollissima_newGene_334	--	2.6921	0.772157	0.28242	2.25636e-10	-2.40231	down	0.00313102	-1.29129	down	0.91223	-0.619266	normal	--	--	Cellular Component: chloroplast (GO:0009507);;	--	--	[R]	General function prediction only	--	--	O	Posttranslational modification, protein turnover, chaperones	hypothetical protein CFP56_68479 [Quercus suber]	cellular component: cell (GO:0005623);; cellular component: organelle (GO:0043226);; cellular component: cell part (GO:0044464)
EVM0017338	EVM0017338	3.3863	7.40678	3.68607	0.00134343	0.92599	up	1.40551e-05	1.58127	up	0.867443	-0.536972	normal	[IQR]	Lipid transport and metabolism;; Secondary metabolites biosynthesis, transport and catabolism;; General function prediction only	Molecular Function: oxidoreductase activity (GO:0016491);; Biological Process: oxidation-reduction process (GO:0055114);;	K15095|3.80422e-133|pper:PRUPE_ppa009290mg|K15095 (+)-neomenthol dehydrogenase [EC:1.1.1.208] | (RefSeq) hypothetical protein	Monoterpenoid biosynthesis (ko00902)	[Q]	Secondary metabolites biosynthesis, transport and catabolism	short chain dehydrogenase;; Enoyl-(Acyl carrier protein) reductase;; KR domain;; NAD dependent epimerase/dehydratase family	(+)-neomenthol dehydrogenase OS=Arabidopsis thaliana OX=3702 GN=SDR1 PE=1 SV=1	S	Function unknown	(+)-neomenthol dehydrogenase-like [Quercus suber]	molecular function: catalytic activity (GO:0003824);; biological process: metabolic process (GO:0008152);; biological process: single-organism process (GO:0044699)
EVM0018980	EVM0018980	61.121	4.25119	21.3081	0.650785	-0.493638	normal	7.17022e-07	-3.21132	down	0.038012	2.04491	normal	--	--	--	--	--	--	--	--	--	--	--	--	--
EVM0028080	EVM0028080	5.04908	7.27043	8.15506	1.33685e-13	1.49589	up	0.00157423	0.98918	up	0.890786	0.465479	normal	[P]	Inorganic ion transport and metabolism	Cellular Component: integral component of membrane (GO:0016021);; Biological Process: metal ion transport (GO:0030001);; Molecular Function: metal ion transmembrane transporter activity (GO:0046873);; Biological Process: transmembrane transport (GO:0055085);;	--	--	--	--	CorA-like Mg2+ transporter protein	--	S	Function unknown	uncharacterized protein LOC111986351 [Quercus suber]	cellular component: membrane (GO:0016020);; cellular component: membrane part (GO:0044425);; biological process: localization (GO:0051179);; molecular function: transporter activity (GO:0005215)
EVM0028804	EVM0028804	1.45495	0.642649	0.199644	7.59726e-06	-2.01058	down	0.192968	-0.691969	normal	0.912998	-0.618978	normal	--		Molecular Function: protein serine/threonine kinase activity (GO:0004674);; Molecular Function: ATP binding (GO:0005524);; Biological Process: protein phosphorylation (GO:0006468);;	--	--	[T]	Signal transduction mechanisms	Protein tyrosine kinase;; Protein kinase domain	Probable serine/threonine-protein kinase PIX13 OS=Arabidopsis thaliana OX=3702 GN=PIX13 PE=1 SV=2	T	Signal transduction mechanisms	putative serine/threonine-protein kinase pix13 [Quercus suber]	molecular function: catalytic activity (GO:0003824);; biological process: metabolic process (GO:0008152);; biological process: cellular process (GO:0009987);; molecular function: binding (GO:0005488)
[truncated: 10,288 more rows]

## Sheet: Table S2
Table S2 The common-DEGs (6,137) present in at least two comparisons
[truncated: 6,138 more rows]

## Sheet: Table S3
Table S3 GO enrichment analysis of the common-DEGs
[truncated: 54 more rows]

## Sheet: Table S4
Table S4 KEGG pathway analysis of the common-DEGs
Pathway ID	Description	DEGs with pathway annotation	pvalue	qvalue	geneID
[truncated: 125 more rows]

## Sheet: Table S5
Table S5 DEGs involved in plant hormone signal transduction pathways
[truncated: 94 more rows]

[truncated: 4 more sheets: Table S6, Table S7, Table S8, Table S9]
